# Supplementary material for: Hypothesis: determining phenotypic specificity facilitates understanding of pathophysiology in rare genetic disorders
Source: PubMed Central journal article supplement — J Inherit Metab Dis. 2020 Jan 17;43(4):701–11. doi: 10.1002/jimd.12201 (PMC7383723; doi:10.1002/jimd.12201), 2020-01-17
Supplement: JIMD-43-701-s001.pdf [file JIMD-43-701-s001.pdf]

**Supplementary Figure 1: Number of phenotypic features versus phenotypic frequency in COG-CDG**

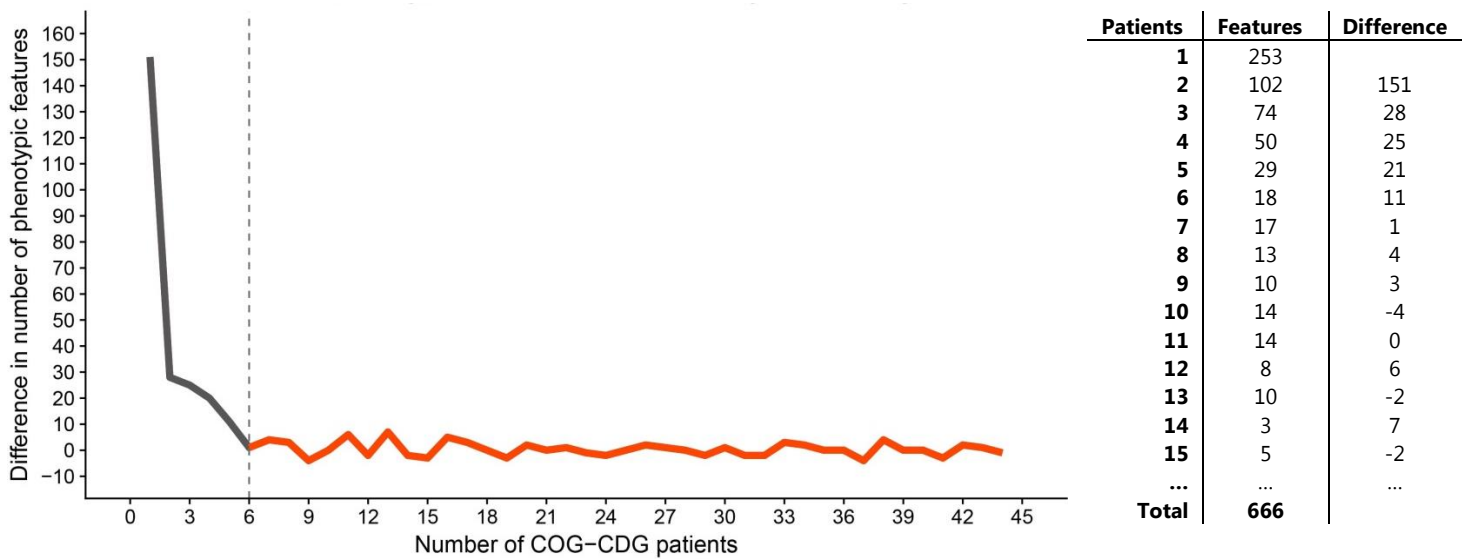

A sliding scale was noted of only one phenotypic feature that is described in all patients, towards many phenotypic features that are described in only one COG-CDG patient (table, column "features"). For features described in at least six COG-CDG patients the number of phenotypic features added to the total list per added patient frequency is very constant (Figure). This suggests that zooming in on features described in at least six COG-CDG patients provides the most relevant focus.

**Supplementary Figure 2: Specificity ratio versus phenotypic frequency in COG-CDG**

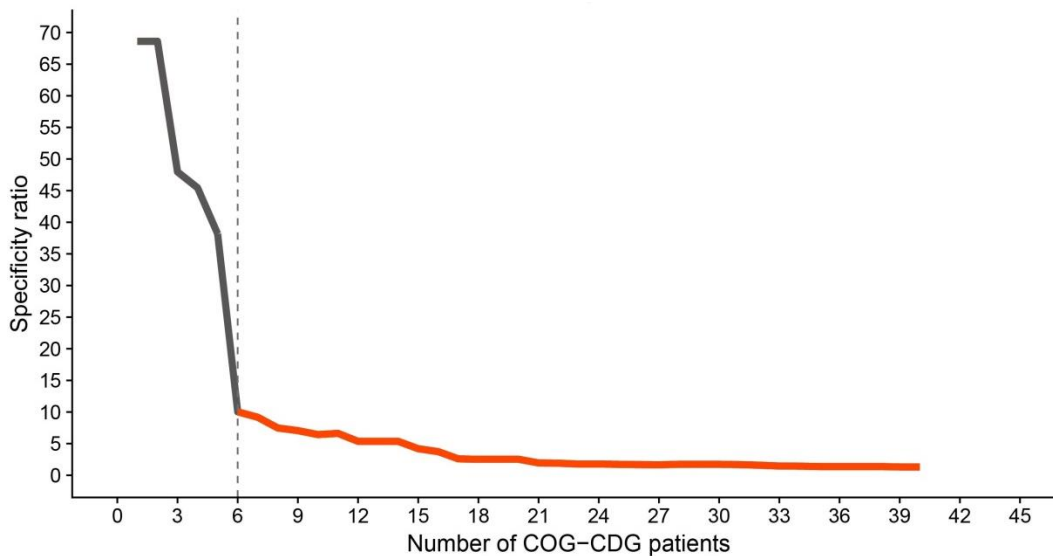

A "specificity ratio" was calculated: the ratio of the median occurrence ratio of the top 10 phenotypic features over the median occurrence ratio of all other phenotypic features. This specificity ratio in relation to the number of COG-CDG patients presenting with a phenotypic feature supported the cut-off value of at least six patients presenting with a certain phenotypic feature.

**Supplementary Figure 3: Phenotypic specificity when assessing features present in at least four patients**

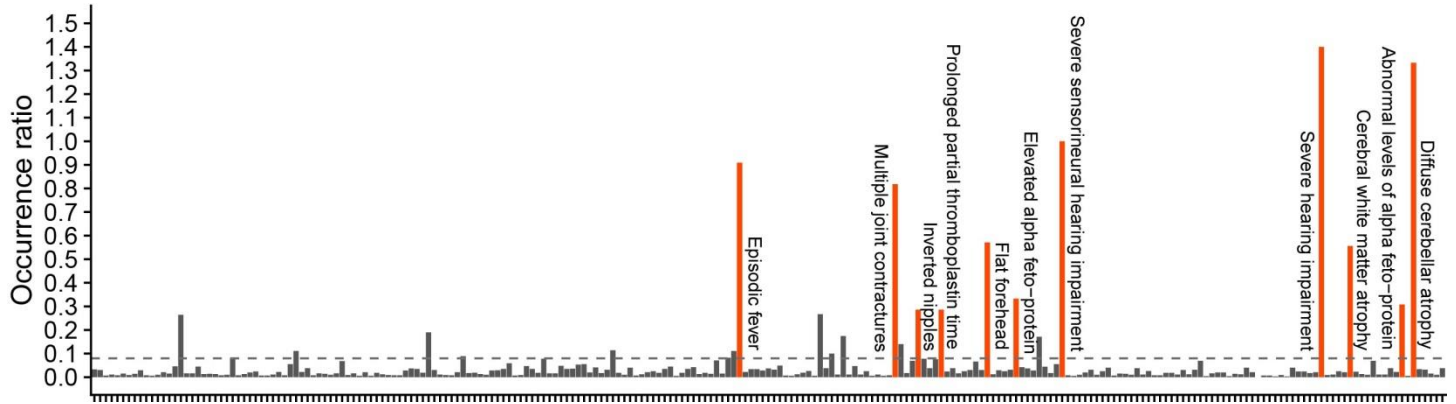

A wider zoom than the cut-off value of a phenotypic feature being present in at least six COG-CDG patients, namely being present in at least four COG-CDG patients, results in a longer list of less relevant features.

**Supplementary Figure 4: Phenotypic specificity when assessing features present in at least eight patients**

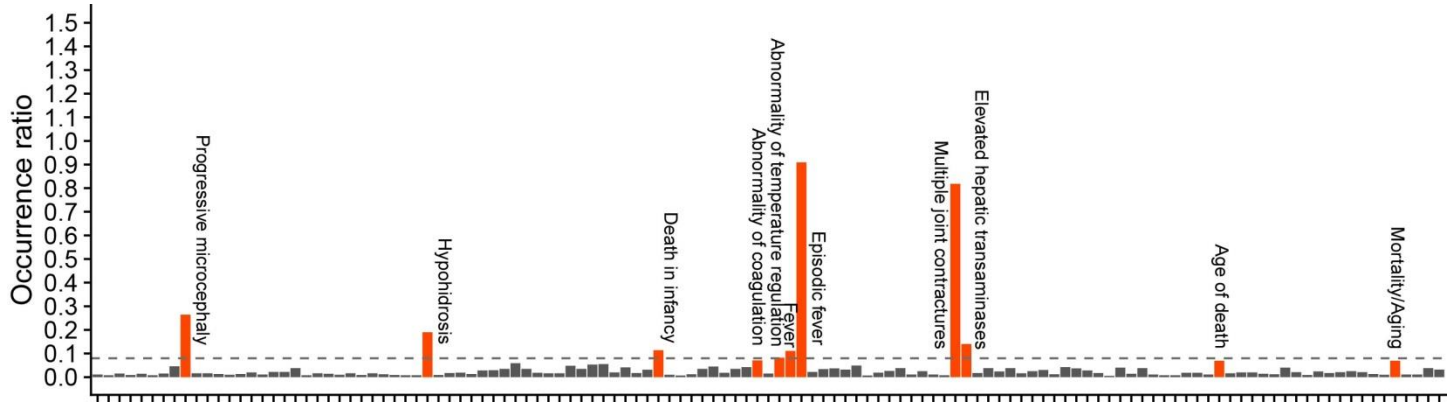

A narrower zoom than the cut-off value of a phenotypic feature being present in at least six COG-CDG patients, namely being present in at least eight COG-CDG patients, results in missing relevant features.

## Supplementary Figure 5: Specific phenotypic features in COG-CDG associated with other CDG

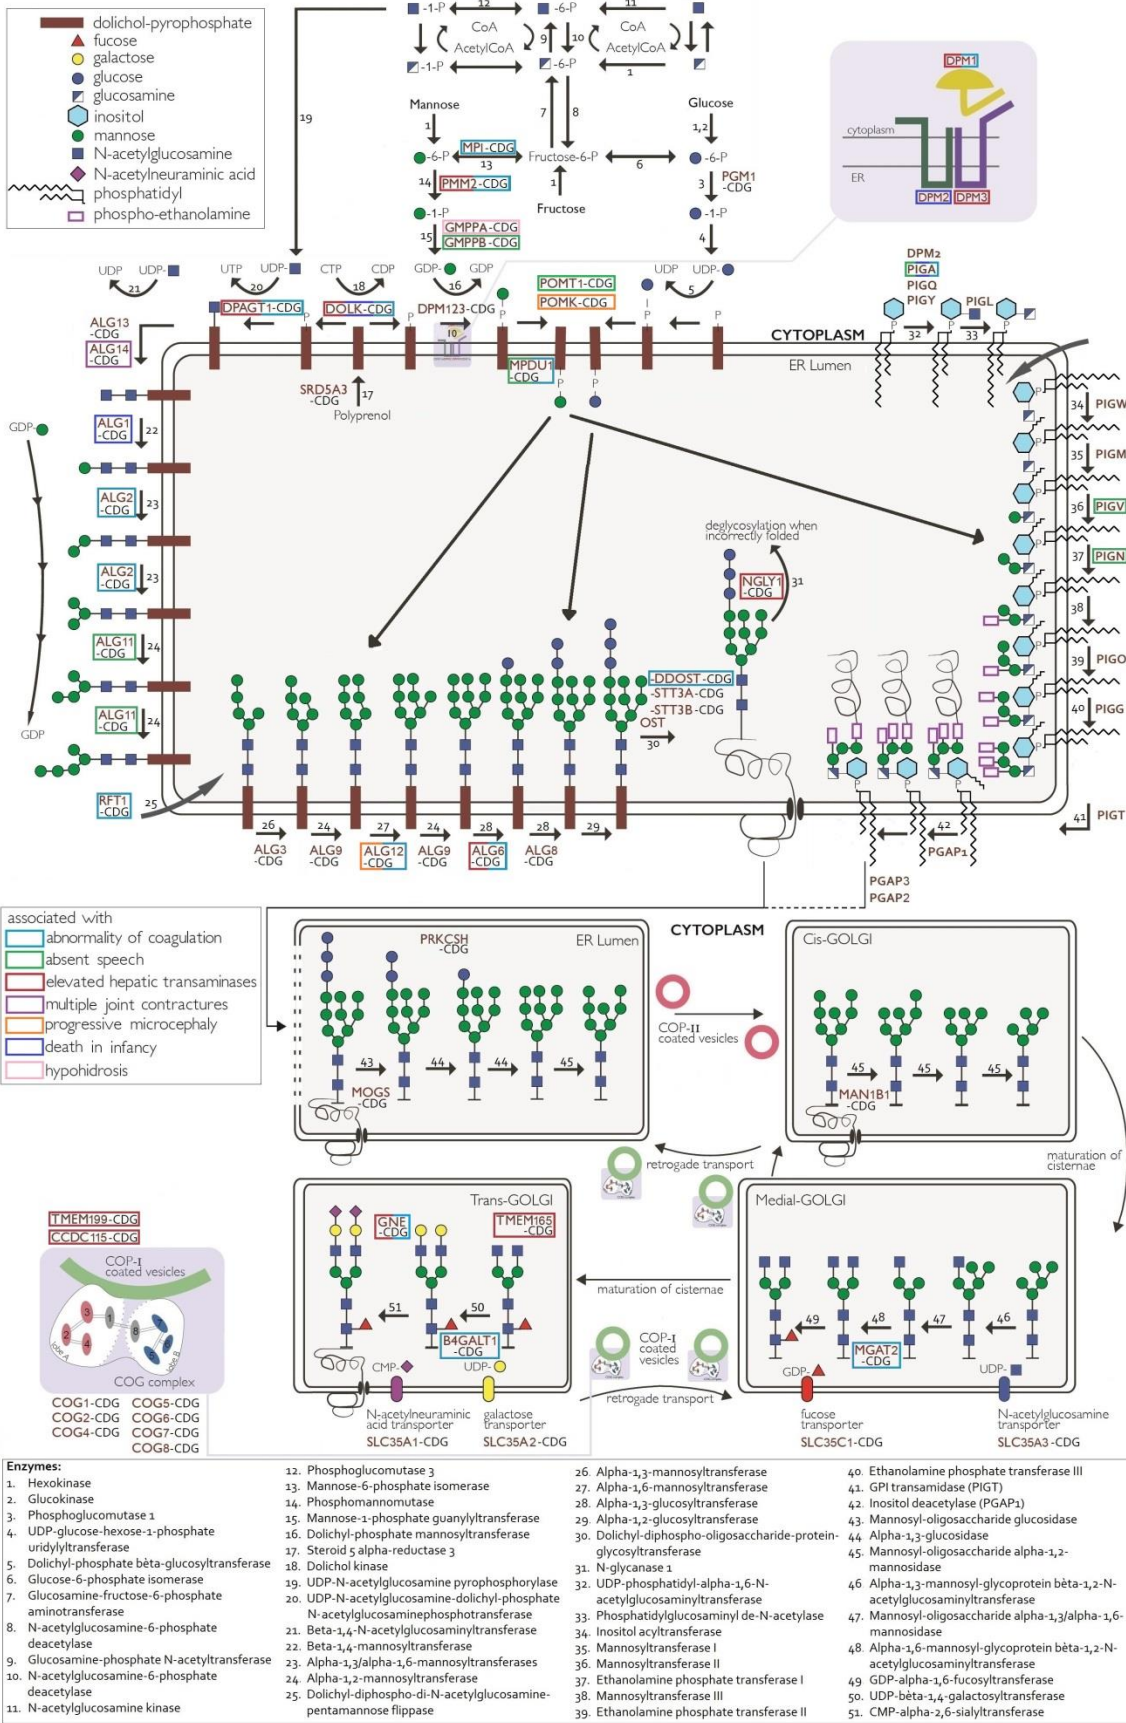

The glycosylation process. ER, endoplasmic reticulum; COG, Conserved Oligomeric Golgi; CDG, Congenital Disorder of Glycosylation. Black text: metabolites. Red text: known CDG, caused by a deficiency of the gene encoding the required enzyme. Seven of the ten extracted highly specific phenotypic features are clearly associated with other CDG, depicted in the different colors surrounding the known CDG. For example, abnormality of coagulation and elevated hepatic transaminases are mainly seen in CDG affecting N-glycosylation (process drawn on the left of the ER), while absent speech is seen in CDG affecting O-mannosylation and glycosylphosphatidylinositol anchoring (process drawn on the right of the ER).

## Supplementary Notes 1: R code to create figures

```
library('ggplot2')
library('cowplot')

setwd("~/Promotietraject/3) COG-CDG/A) Change of focus")
color<-c('TRUE'='orangered', 'FALSE'='gray34')

# Load files
AllRatios<-read.csv("COG_AllRatios_CSV.csv", sep=";", stringsAsFactors=FALSE)
AllRatios$HPOcode<-factor(AllRatios$HPOcode, levels=unique(AllRatios$HPOcode))
SelRatios<-read.csv("COG_SelRatios_CSV.csv", sep=";", stringsAsFactors=FALSE)
SelRatios$HPOcode<-factor(SelRatios$HPOcode, levels=unique(SelRatios$HPOcode))

# Figure 1A and 1B
p1<-ggplot()+
  geom_bar(data=AllRatios[which(AllRatios[,5]>5),],
  stat='identity', aes(x=HPOcode, y=Ratio, fill=Ratio>=0.08))+
  geom_text(data=AllRatios[which(AllRatios[,6]>=0.08 & AllRatios[,5]>5),],
  aes(x=HPOcode, y=Ratio, label=Feature), size=3, vjust=0)+
  geom_hline(yintercept=0.08, col='gray43', linetype=2)+
  scale_fill_manual(values=color)+
  scale_y_continuous(breaks=seq(0, 1.5, 0.1), limits=c(0, 1.5))+
  labs(x='HPO code', y='Occurrence ratio', title='Phenotypic specificity in
  COG-CDG')+
  theme(axis.text.x=element_text(angle=90, hjust=1, size=7),
  legend.position='none')

p2<-ggplot()+
  geom_bar(data=SelRatios[which(SelRatios[,5]>5),],
  stat='identity', aes(x=HPOcode, y=Ratio, fill=Ratio>=0.07))+
  geom_text(data=SelRatios[which(SelRatios[,6]>=0.07 & SelRatios[,5]>5),],
  aes(x=HPOcode, y=Ratio, label=Feature), size=3, vjust=0)+
  geom_hline(yintercept=0.07, col='gray43', linetype=2)+
  scale_fill_manual(values=color)+
  scale_y_continuous(breaks=seq(0, 1.5, 0.1), limits=c(0, 1.5))+
  labs(x='HPO code', y='Ratio COG-CDG patients over HPO associated genes',
  title='Phenotypic specificity in COG-CDG, excluding super classes of
  episodic fever')+
  theme(axis.text.x=element_text(angle=90, hjust=1, size=7),
  legend.position='none')

plot_grid(p1, p2, ncol=1, axis='rlbt', rel_heights=c(1, 1))
rm(p1, p2)

# Supplementary Figure 1
Diff<-read.csv("COG_difference_CSV.csv", sep=";", stringsAsFactors=FALSE)
ggplot(Diff)+
  geom_line(aes(x=Patients, y=Difference, col=Patients<5), size=2)+
  geom_line(aes(x=Patients, y=Difference, col=Patients>=6), size=2)+
  geom_vline(xintercept=6, col='gray43', linetype=2)+
  scale_color_manual(values=color)+
  scale_y_continuous(breaks=seq(-10, 160, 10), limits=c(-10, 160))+
  scale_x_continuous(breaks=seq(0, 45, 3), limits=c(0, 45))+
  labs(x='Number of COG-CDG patients', y='Difference in number of phenotypic
  features', title='Number of phenotypic features versus phenotypic frequency
  in COG-CDG')+
  theme(legend.position='none')

# Supplementary Figure 2
AllRatios<-AllRatios[order(-AllRatios$Ratio),]
Spec<-setNames(data.frame(matrix(ncol=3, nrow=45)),
c('MedianTop10', 'MedianNoise', 'MedianRatio'))
for(freq in 1:40) {
  Spec[freq, 1]<-median(as.numeric(AllRatios[which(AllRatios[,5]>
(freq-1)), 6][1:10]), na.rm=TRUE)
  Spec[freq, 2]<-median(as.numeric(AllRatios[which(AllRatios[,5]>
(freq-1)), 6][11:length(AllRatios[which(AllRatios[,5]>
(freq-1)), 6])]), na.rm=TRUE)
  Spec[freq, 3]<-(Spec[freq, 1]/Spec[freq, 2])
}
```

```

Spec$Patients<-as.numeric(as.character(rownames(Spec)))
ggplot(Spec)+
  geom_line(aes(x=Patients,y=MedianRatio,col=Patients<5),size=2)+
  geom_line(aes(x=Patients,y=MedianRatio,col=Patients>=6),size=2)+
  geom_vline(xintercept = 6,col='gray43',linetype=2)+
  scale_color_manual(values=color)+
  scale_x_continuous(breaks=seq(0,45,3),limits=c(0,45))+
  scale_y_continuous(breaks=seq(0,70,5),limits=c(0,70))+
  labs(x='Number of COG-CDG patients',y='Specificity ratio',
  title='Specificity ratio versus phenotypic frequency in COG-CDG')+
  theme(legend.position='none')

```

#### # Supplementary Figure 3

```

ggplot()+
  geom_bar(data=AllRatios[which(AllRatios[,5]>3),],
  stat='identity',aes(x=HPOcode,y=Ratio,fill=Ratio>=0.28))+
  geom_text(data=AllRatios[which(AllRatios[,6]>=0.08 & AllRatios[,5]>3),],
  aes(x=HPOcode,y=Ratio,label=Feature),size=3,vjust=0)+
  geom_hline(yintercept=0.08,col='gray43',linetype=2)+
  scale_fill_manual(values=color)+
  scale_y_continuous(breaks=seq(0,1.5,0.1),limits=c(0,1.5))+
  labs(x='HPO code',y='Occurrence ratio', title='Phenotypic specificity in
  COG-CDG')+
  theme(axis.text.x=element_text(angle=90,hjust=1,size=7),
  legend.position='none')

```

#### # Supplementary Figure 4

```

ggplot()+
  geom_bar(data=AllRatios[which(AllRatios[,5]>7),],
  stat='identity',aes(x=HPOcode,y=Ratio,fill=Ratio>=0.06))+
  geom_text(data=AllRatios[which(AllRatios[,6]>=0.08 & AllRatios[,5]>7),],
  aes(x=HPOcode,y=Ratio,label=Feature),size=3,vjust=0)+
  geom_hline(yintercept=0.08,col='gray43',linetype=2)+
  scale_fill_manual(values=color)+
  scale_y_continuous(breaks=seq(0,1.5,0.1),limits=c(0,1.5))+
  labs(x='HPO code',y='Occurrence ratio', title='Phenotypic specificity in
  COG-CDG')+
  theme(axis.text.x=element_text(angle=90,hjust=1,size=7),
  legend.position='none')

```

## Supplementary Notes 2: Standard Operating Procedure "Determining phenotypic specificity to facilitate understanding of underlying pathophysiology in rare genetic disorders"

A Standard Operation Procedure for the identification of highly specific phenotypic features in rare genetic disorders, to study shared pathophysiology.

### Listing all phenotypic features

1. Perform a literature study. Identify all described cases and collect all data from case-reports and case-series. If you need additional information, do not hesitate to contact the authors.

*Example: 45 COG-CDG patients from 32 families, reported in 22 case-reports and case-series.*

2. Choose a single case to start with, preferably the one described in most detail

3. For this case, list all described phenotypic features (preferably in an Excel-like program).

*Example:*

Pregnancy and delivery of the female patient were uncomplicated and at term. The patient suffered from intractable focal seizures, vomiting and loss of consciousness due to intracranial bleedings. Biochemical investigations revealed a normal level for albumin and mildly elevated values for lactate, aspartate aminotransferase and creatine kinase. Metabolic investigations revealed cholestasis and subsequent vitamin K deficiency, explaining in part her intracranial bleedings. The patient died due to brain edema at 5 weeks of age. Since the clinical phenotype of the patient was suspect for a CDG syndrome, initial CDG diagnosis was established by isoelectric focusing (IEF) of the patient's serum transferrin.

*Lübbehusen et al. 2010, Human Molecular Genetics*

*List: intractable focal seizures, vomiting, intracranial bleeding, elevated lactate, elevated aspartate aminotransferase, elevated creatine kinase, cholestasis, vitamin K deficiency*

4. For each phenotypic feature, list the most appropriate HPO-term and the associated HPO-code via [http://compbio.charite.de/hpoweb/showterm?id=HP:0000118#id=HP\\_0000118](http://compbio.charite.de/hpoweb/showterm?id=HP:0000118#id=HP_0000118) (Figure 1). In the search bar you can type the phenotypic feature to see the possible HPO-terms. Primary ID on the left renders the HPO-code. In the middle text block, synonyms for the feature are listed and on the right a textual definition is provided. Super classes and subclasses are listed below. Always be as precise as possible, if a subclass is applicable, it is preferred over its superclass.

Figure 1

The screenshot shows the HPO web interface for the term 'Focal seizures'. At the top, there is a search bar with the text 'Enter search terms ...'. Below the search bar, the page title is 'Focal seizures'. The main content area is divided into several sections:

- Primary ID:** HP:0007359
- Alternative IDs:** HP:0002358
- PURL:** [http://purl.obolibrary.org/obo/HP\\_0007359](http://purl.obolibrary.org/obo/HP_0007359)
- Synonyms:** Partial seizures
- Textual definition:** Seizures of which initial semiology indicates, or is consistent with, initial activation of only part of one cerebral hemisphere.
- Logical definition:** 'has part' some Intersection of
  - [increased amount](#)
  - 'inheres in' some [partial seizure](#)
  - 'has modifier' some [abnormal](#)
- Superclasses:** [Seizures](#)
- Subclasses:** [Focal seizures without impairment of consciousness or awareness](#), [Focal motor seizures](#), [Auras](#), [Focal seizures, afebril](#)

Example:

|                            |                         |            |
|----------------------------|-------------------------|------------|
| Intractable focal seizures | Focal seizures          | HP:0002358 |
| Vomiting                   | Vomiting                | HP:0002013 |
| Intracranial bleeding      | Intracranial hemorrhage | HP:0002170 |
| Elevated lactate           | Increased serum lactate | HP:0002151 |

5. Expand the list of phenotypic features by listing the super classes of each of the phenotypic features that you listed. For the patient that you started with, score each phenotypic feature and all super classes. If you do this, you will preserve the tree-like hierarchical structure of HPO.

Example:

|                                             |            | P1 |  |
|---------------------------------------------|------------|----|--|
| 0. Phenotypic abnormality                   | HP:0000118 | 1  |  |
| 1. Abnormality of the nervous system        | HP:0000707 | 1  |  |
| 2. Abnormality of nervous system physiology | HP:0012638 | 1  |  |
| 3. Seizures                                 | HP:0001250 | 1  |  |
| 4. Focal seizures                           | HP:0002358 | 1  |  |

When more super classes are applicable, list the most appropriate one. If you cannot choose, list both.

6. When you finished this for the first patient, you can add the second:

Example: add the phenotypic feature "profound intellectual disability" to your list:

|                                             |            | P1 | P2 |
|---------------------------------------------|------------|----|----|
| 0. Phenotypic abnormality                   | HP:0000118 | 1  | 1  |
| 1. Abnormality of the nervous system        | HP:0000707 | 1  | 1  |
| 2. Abnormality of nervous system physiology | HP:0012638 | 1  | 1  |
| 3. Neurodevelopmental abnormality           | HP:0012759 | 0  | 1  |
| 4. Intellectual disability                  | HP:0001249 | 0  | 1  |
| 5. Intellectual disability, profound        | HP:0002187 | 0  | 1  |
| 3. Seizures                                 | HP:0001250 | 1  | 0  |
| 4. Focal seizures                           | HP:0002358 | 1  | 0  |

7. Retake step 3-7 until you listed all phenotypic features as detailed as possible for all your patients. Be meticulous in also scoring all appropriate super classes of the phenotypic features.

Example: Supplementary Table 2

#### Calculating gene occurrence ratios

8. Sum the total number of patients for each listed phenotypic feature.

Example: Supplementary Table 2

9. Calculate the phenotypic frequency by dividing the total number of patients that present with a phenotypic feature over the total number of included patients

Example: Supplementary Table 1

10. Retrieve from HPO for each phenotypic feature the number of associated genes and note this number for each of the phenotypic features and all super classes.

The associated number of genes can be found below the number of associated diseases (Figure 2). HPO is frequently updated, so note the date you last consulted HPO and during your assessment, regularly check if nothing has changed.

Figure 2

| 66 associated diseases |                                                                            |
|------------------------|----------------------------------------------------------------------------|
| Disease id             | Disease name                                                               |
| OMIM:607745            | SEIZURES, BENIGN FAMILIAL INFANTILE, 3                                     |
| OMIM:614563            | MENTAL RETARDATION, AUTOSOMAL DOMINANT 13                                  |
| ORPHA:31709            | Infantile convulsions and choreoathetosis                                  |
| ORPHA:369929           | Aldosterone-producing adenoma with seizures and neurological abnormalities |
| ORPHA:1935             | Early myoclonic encephalopathy                                             |
| ORPHA:398189           | Focal facial dermal dysplasia type IV                                      |

Export to Excel  Export to CSV 

  

| 50 associated genes |                                                                                                                                                                       |
|---------------------|-----------------------------------------------------------------------------------------------------------------------------------------------------------------------|
| Gene                | Associated diseases                                                                                                                                                   |
| NHLRC1 (378884)     | MYOCLONIC EPILEPSY OF LAFORA (OMIM:254780)                                                                                                                            |
| GABRB3 (2562)       | Lennox-Gastaut syndrome (ORPHA:2382), EPILEPTIC ENCEPHALOPATHY, EARLY INFANTIL... (OMIM:617113)                                                                       |
| GABRG2 (2566)       | Dravet syndrome (ORPHA:33069), GENERALIZED EPILEPSY WITH FEBRILE SEIZUR... (OMIM:611277)                                                                              |
| SLC25A22 (79751)    | Early myoclonic encephalopathy (ORPHA:1935), EPILEPTIC ENCEPHALOPATHY, EARLY INFANTIL... (OMIM:609304)                                                                |
| CLN8 (2055)         | CEROID LIPOFUSCINOSIS, NEURONAL, 8, NORT... (OMIM:610003), Progressive epilepsy-intellectual disabi... (ORPHA:1947), CEROID LIPOFUSCINOSIS, NEURONAL, 8 (OMIM:600143) |
| CACNA1D (776)       | Aldosterone-producing adenoma with seizu... (ORPHA:369929), PRIMARY ALDOSTERONISM, SEIZURES, AND NEU... (OMIM:615474), SINUS BRADYCARDIA AND DEAFNESS (OMIM:614896)   |

Export to Excel  Export to CSV 

Copy Id/Label Graph view

Example: Supplementary Table 1

- Calculate the **gene occurrence ratio** by dividing the frequency in the patient cohort over the number of associated genes.  
 Example: episodic fever was noted in 20 patients (Table 1) and the feature is associated with 22 genes. Occurrence ratio is  $20/22 = 0.909$ . For all occurrence ratios, see Supplementary Table 1.

Determine the cut-off value to meet a minimum sensitivity

- Order all phenotypic features on the total number of patients that present with the phenotypic feature and calculate the number of phenotypic features that were noted in only one patient, the number of phenotypic features that were noted in only two patients, etc. and tabulate this.  
 Example: Supplementary Figure 1
- Calculate and plot the differences between these numbers. The cut-off value is the number of patients from whereon the difference in number of phenotypic features is fairly stable.  
 Example: Supplementary Figure 1
- This cut-off value can be checked by calculating the specificity ratio. This is the ratio of the median occurrence ratio of the top ten phenotypic features over the median occurrence ratio of all phenotypic features.
  - If no cut-off value is used, calculate the median occurrence ratio of the ten phenotypic features with the highest occurrence ratios. In addition, calculate the median occurrence of all other phenotypic features. The specificity ratio is calculated by dividing the median occurrence ratio of the top ten phenotypic features over the median occurrence ratio of all phenotypic features.
  - Exclude all phenotypic features that are noted in only one patient and calculate the second specificity ratio.
  - Exclude all phenotypic features that are noted in one or two patients and calculate the third specificity ratio.
  - Calculate specificity ratios for all possible phenotypic frequencies and plot this. This should support the cut-off value from step 13.

Example: Supplementary Figure 2



### Study highly specific phenotypic features

15. To study the top XX highly specific phenotypic features of a given disease (in the paper top 10 phenotypic features), retrieve the list of associated genes from HPO (Figure 2, Export to Excel).

*Example: Table 2*

16. Derive the gene encoded protein functions from GeneCards.com or other resources.

*Example: for episodic fever one of the genes is ELP1. According to GeneCards this is Elongator Protein Complex 1, a scaffold protein and regulator for three different kinases involved in proinflammatory signaling.*

17. Classify the protein functions into – data-driven – categories.

*Example: Table 2. ELP1 was categorized in the category "Immune system".*

18. Note the number of genes per category to assess differences in distribution over the categories from the different phenotypic features.

*Example: Table 1.*

19. Based on your research question, decide what might be an interesting phenotypic feature to look into.

*Example: for episodic fever even its two super classes (fever (HP:0001945) and abnormality of temperature regulation (HP:0004370)) stood out as highly specific phenotypic features and it was not associated to any other glycosylation disorder, so this phenotypic feature was chosen to (first) look into.*

20. Perform literature studies for each of the associated genes and see if you can establish one or multiple pathophysiological pathways where genes are related to. This way you can conceive a hypothesis on the possible function in this pathway of the gene you are studying.

### Disclaimer

Please bear in mind that the systematic assessment of phenotypic specificity and shared pathophysiology as described here heavily relies on the extent, specificity and completeness of the initial phenotypic description, and also on the accuracy and completeness of the used open access databases: HPO and GeneCards. For HPO, be aware that it is regularly updated, not always with adjustment of the version (Figure 3).

### *Figure 3*

Ontology version: <http://purl.obolibrary.org/obo/hp/releases/2017-12-12/hp.owl>  
Copyright 2018 - Sebastian Köhler & The Phenomics Group Berlin  
[Contact: dr.sebastian.koehler@gmail.com](mailto:dr.sebastian.koehler@gmail.com)

**Supplementary Table 1: Aligning phenotypic descriptions to assess phenotypic frequency using the Human Phenotype Ontology in COG-CDG – Summarized table**

| Clinical features                             | HPO code <sup>a</sup> | COG1             | COG2 | COG4 | COG5 | COG6 | COG7 | COG8 | Total | %   |
|-----------------------------------------------|-----------------------|------------------|------|------|------|------|------|------|-------|-----|
|                                               |                       | N=3 <sup>b</sup> | N=1  | N=2  | N=10 | N=18 | N=8  | N=3  | N=45  |     |
| Abn. of the nervous system                    | HP:0000707            | 3                | 1    | 2    | 10   | 18   | 8    | 3    | 45    | 100 |
| Microcephaly                                  | HP:0000252            | 3                | 1    | 1    | 7    | 15   | 6    | 1    | 34    | 76  |
| Global developmental delay                    | HP:0001263            | 3                | 1    | 2    | 6    | 16   | 4    | 1    | 33    | 73  |
| Intellectual disability                       | HP:0001249            | 2                | 1    |      | 10   | 9    |      | 2    | 24    | 53  |
| Seizures                                      | HP:0001250            |                  | 1    | 2    | 1    | 4    | 5    | 2    | 15    | 33  |
| Cerebral atrophy                              | HP:0002059            | 2                | 1    | 2    | 1    | 4    | 2    | 1    | 13    | 29  |
| Cerebellar atrophy                            | HP:0001272            | 2                |      |      | 5    | 1    | 2    | 2    | 12    | 27  |
| Reduced tendon reflexes                       | HP:0001315            |                  |      |      | 4    | 1    | 5    | 2    | 12    | 27  |
| Abnormality of the abdomen                    | HP:0001438            | 1                | 1    | 2    | 3    | 12   | 8    | 3    | 30    | 67  |
| Abnormality of the liver                      | HP:0001392            | 1                | 1    | 2    | 2    | 12   | 7    | 2    | 27    | 60  |
| Elevated hepatic transam.                     | HP:0002910            |                  |      | 2    | 1    | 12   | 5    | 2    | 22    | 49  |
| Hepatomegaly                                  | HP:0002240            | 1                |      | 1    | 2    | 6    | 5    |      | 15    | 33  |
| Splenomegaly                                  | HP:0001744            | 1                |      | 1    | 1    | 8    | 2    |      | 13    | 29  |
| Growth abnormality                            | HP:0001507            | 3                |      | 1    | 6    | 14   | 8    | 2    | 34    | 76  |
| Failure to thrive                             | HP:0001508            | 1                |      | 1    | 3    | 12   | 8    | 1    | 26    | 58  |
| Short stature                                 | HP:0004322            | 2                |      | 1    | 5    | 3    | 3    | 1    | 15    | 33  |
| Muscular hypotonia                            | HP:0001252            | 1                |      | 2    | 7    | 11   | 8    | 3    | 32    | 71  |
| Abnormality of the face                       | HP:0000271            | 3                | 1    | 1    | 4    | 15   | 6    | 2    | 32    | 71  |
| Abnormality of the mouth                      | HP:0000153            | 2                |      |      | 1    | 6    | 4    |      | 13    | 29  |
| Abnormality of the nose                       | HP:0000366            | 1                |      |      | 2    | 5    | 3    | 1    | 12    | 27  |
| Abn. of the orbital region                    | HP:0000315            | 2                |      |      |      | 6    | 3    | 1    | 12    | 27  |
| Abnormality of the skull                      | HP:0000929            | 1                |      |      | 1    | 4    | 5    | 1    | 12    | 27  |
| Abn. of skeletal morphology                   | HP:0011842            | 2                |      |      | 6    | 11   | 5    | 1    | 25    | 56  |
| Episodic fever                                | HP:0001954            |                  |      |      |      | 11   | 8    | 1    | 20    | 44  |
| Abnormality of blood or blood-forming tissues | HP:0001871            | 1                | 1    | 2    | 1    | 9    | 2    | 1    | 17    | 38  |
| Abnormality of limbs                          | HP:0040064            | 3                |      |      | 2    | 4    | 4    | 2    | 15    | 33  |
| Abnormality of eye physiology                 | HP:0012373            | 1                |      | 1    | 3    | 5    | 2    | 2    | 14    | 31  |
| Abnormality of the ear                        | HP:0000598            | 2                |      |      | 4    | 1    | 6    |      | 13    | 29  |
| Recurrent infections                          | HP:0002719            | 1                |      | 2    | 1    | 7    | 2    |      | 13    | 29  |
| Abn. of the urinary system                    | HP:0000079            | 2                |      |      | 4    | 3    | 3    | 1    | 13    | 29  |
| Abn. of circulating protein level             | HP:0010876            |                  |      | 1    | 1    | 5    | 3    | 2    | 12    | 27  |
| Abn. of the cardiovasc. system                | HP:0001626            | 2                |      |      |      | 6    | 4    |      | 12    | 27  |
| Death in infancy                              | HP:0001522            |                  |      |      |      |      |      |      | 15    | 33  |
| Neonatal death                                | HP:0003811            |                  |      |      |      |      |      |      | 1     |     |

|        |        |        |        |         |
|--------|--------|--------|--------|---------|
| 25-40% | 41-55% | 56-70% | 71-85% | 86-100% |
|--------|--------|--------|--------|---------|

a) HPO: Human Phenotype Ontology. b) N: number of patients.

**Supplementary Table 2: Aligning phenotypic descriptions using the Human Phenotype Ontology in COG-CDG - Full table**

| <b>Index</b> | <b>Superclass</b> | <b>Clinical feature</b>                                  | <b>HPO code</b> | <b>COG1</b> | <b>COG2</b> | <b>COG4</b> | <b>COG5</b> | <b>COG6</b> | <b>COG7</b> | <b>COG8</b> | <b>All</b> | <b>Ass. genes</b> | <b>Occ. ratio</b> |
|--------------|-------------------|----------------------------------------------------------|-----------------|-------------|-------------|-------------|-------------|-------------|-------------|-------------|------------|-------------------|-------------------|
| 1            | 1                 | Abnormality of blood or blood-forming tissues            | HP:0001871      | 1           | 1           | 2           | 1           | 9           | 2           | 1           | <b>17</b>  | <b>944</b>        | <b>0.018</b>      |
| 2            | 2                 | Abnormal bleeding                                        | HP:0001892      | 0           | 0           | 0           | 0           | 4           | 1           | 1           | <b>6</b>   | <b>340</b>        | <b>0.018</b>      |
| 3            | 3                 | Gingival bleeding                                        | HP:0000225      | 0           | 0           | 0           | 0           | 1           | 0           | 0           | <b>1</b>   | <b>27</b>         | <b>0.037</b>      |
| 4            | 3                 | Epistaxis                                                | HP:0000421      | 0           | 0           | 0           | 0           | 1           | 0           | 0           | <b>1</b>   | <b>60</b>         | <b>0.017</b>      |
| 5            | 4                 | Spontaneous, recurrent epistaxis                         | HP:0004406      | 0           | 0           | 0           | 0           | 1           | 0           | 0           | <b>1</b>   | <b>4</b>          | <b>0.250</b>      |
| 6            | 3                 | Internal hemorrhage                                      | HP:0011029      | 0           | 0           | 0           | 0           | 4           | 1           | 0           | <b>5</b>   | <b>191</b>        | <b>0.026</b>      |
| 7            | 4                 | Hemorrhage of the eye                                    | HP:0011885      | 0           | 0           | 0           | 0           | 1           | 0           | 0           | <b>1</b>   | <b>23</b>         | <b>0.043</b>      |
| 8            | 5                 | Retinal hemorrhage                                       | HP:0000573      | 0           | 0           | 0           | 0           | 1           | 0           | 0           | <b>1</b>   | <b>10</b>         | <b>0.100</b>      |
| 9            | 4                 | Intracranial hemorrhage                                  | HP:0002170      | 0           | 0           | 0           | 0           | 2           | 0           | 0           | <b>2</b>   | <b>71</b>         | <b>0.028</b>      |
| 10           | 5                 | Subdural hemorrhage                                      | HP:0100309      | 0           | 0           | 0           | 0           | 1           | 0           | 0           | <b>1</b>   | <b>1</b>          | <b>1.000</b>      |
| 11           | 4                 | Gastrointestinal bleeding                                | HP:0002239      | 0           | 0           | 0           | 0           | 2           | 0           | 0           | <b>2</b>   | <b>116</b>        | <b>0.017</b>      |
| 12           | 3                 | Subcutaneous hemorrhage                                  | HP:0001933      | 0           | 0           | 0           | 0           | 0           | 0           | 1           | <b>1</b>   | <b>174</b>        | <b>0.006</b>      |
| 13           | 4                 | Spontaneous hematomas                                    | HP:0007420      | 0           | 0           | 0           | 0           | 0           | 0           | 1           | <b>1</b>   | <b>23</b>         | <b>0.043</b>      |
| 14           | 2                 | Abnormal thrombosis                                      | HP:0001977      | 0           | 0           | 0           | 0           | 1           | 0           | 0           | <b>1</b>   | <b>95</b>         | <b>0.011</b>      |
| 15           | 3                 | Disseminated intravascular coagulation                   | HP:0005521      | 0           | 0           | 0           | 0           | 1           | 0           | 0           | <b>1</b>   | <b>3</b>          | <b>0.333</b>      |
| 16           | 2                 | Abnormality of coagulation                               | HP:0001928      | 0           | 1           | 2           | 1           | 3           | 1           | 1           | <b>9</b>   | <b>127</b>        | <b>0.071</b>      |
| 17           | 3                 | Abnormality of the coagulation cascade                   | HP:0003256      | 0           | 0           | 2           | 0           | 1           | 1           | 1           | <b>5</b>   | <b>66</b>         | <b>0.076</b>      |
| 18           | 4                 | Reduced antithrombin III activity                        | HP:0001976      | 0           | 0           | 1           | 0           | 0           | 0           | 1           | <b>2</b>   | <b>8</b>          | <b>0.250</b>      |
| 19           | 4                 | Reduced protein C activity                               | HP:0005543      | 0           | 0           | 0           | 0           | 0           | 0           | 1           | <b>1</b>   | <b>2</b>          | <b>0.500</b>      |
| 20           | 4                 | Reduced protein S activity                               | HP:0004855      | 0           | 0           | 0           | 0           | 0           | 0           | 1           | <b>1</b>   | <b>2</b>          | <b>0.500</b>      |
| 21           | 4                 | Abnormality of the intrinsic pathway                     | HP:0010989      | 0           | 0           | 0           | 0           | 1           | 0           | 0           | <b>1</b>   | <b>23</b>         | <b>0.043</b>      |
| 22           | 5                 | Reduced factor XI activity                               | HP:0001929      | 0           | 0           | 0           | 0           | 1           | 0           | 0           | <b>1</b>   | <b>5</b>          | <b>0.200</b>      |
| 23           | 3                 | Prolonged partial thromboplastin time                    | HP:0003645      | 0           | 0           | 0           | 1           | 3           | 0           | 0           | <b>4</b>   | <b>14</b>         | <b>0.286</b>      |
| 24           | 2                 | Abnormality of thrombocytes                              | HP:0001872      | 1           | 0           | 1           | 1           | 5           | 1           | 0           | <b>9</b>   | <b>260</b>        | <b>0.035</b>      |
| 25           | 3                 | Abnormal platelet count                                  | HP:0011873      | 1           | 0           | 1           | 1           | 5           | 1           | 0           | <b>9</b>   | <b>227</b>        | <b>0.040</b>      |
| 26           | 4                 | Thrombocytopenia                                         | HP:0001873      | 1           | 0           | 1           | 1           | 5           | 1           | 0           | <b>9</b>   | <b>216</b>        | <b>0.042</b>      |
| 27           | 5                 | Macrothrombocytopenia                                    | HP:0040185      | 1           | 0           | 0           | 0           | 0           | 0           | 0           | <b>1</b>   | <b>6</b>          | <b>0.167</b>      |
| 28           | 2                 | Abnormality of bone marrow cell morphology               | HP:0005561      | 1           | 0           | 0           | 0           | 4           | 1           | 0           | <b>6</b>   | <b>191</b>        | <b>0.031</b>      |
| 29           | 3                 | Abnormality of cells of the erythroid lineage            | HP:0012130      | 1           | 0           | 0           | 0           | 3           | 1           | 0           | <b>5</b>   | <b>2</b>          | <b>2.500</b>      |
| 30           | 4                 | Abnormality of erythrocytes                              | HP:0001877      | 1           | 0           | 0           | 0           | 3           | 1           | 0           | <b>5</b>   | <b>395</b>        | <b>0.013</b>      |
| 31           | 5                 | Anemia                                                   | HP:0001903      | 1           | 0           | 0           | 0           | 3           | 1           | 0           | <b>5</b>   | <b>365</b>        | <b>0.014</b>      |
| 32           | 3                 | Abnormality of cells of the monocyte/macrophage lineage  | HP:0012144      | 0           | 0           | 0           | 0           | 2           | 0           | 0           | <b>2</b>   | <b>33</b>         | <b>0.061</b>      |
| 33           | 4                 | Abnormality of macrophages                               | HP:0004311      | 0           | 0           | 0           | 0           | 1           | 0           | 0           | <b>1</b>   | <b>27</b>         | <b>0.037</b>      |
| 34           | 5                 | Hemophagocytosis                                         | HP:0012156      | 0           | 0           | 0           | 0           | 1           | 0           | 0           | <b>1</b>   | <b>8</b>          | <b>0.125</b>      |
| 35           | 4                 | Abnormal monocyte count                                  | HP:0012310      | 0           | 0           | 0           | 0           | 1           | 0           | 0           | <b>1</b>   | <b>6</b>          | <b>0.167</b>      |
| 36           | 5                 | Monocytosis                                              | HP:0012311      | 0           | 0           | 0           | 0           | 1           | 0           | 0           | <b>1</b>   | <b>4</b>          | <b>0.250</b>      |
| 37           | 3                 | Abnormality of multiple cell lineages in the bone marrow | HP:0012145      | 0           | 0           | 0           | 0           | 2           | 0           | 0           | <b>2</b>   | <b>88</b>         | <b>0.023</b>      |
| 38           | 4                 | Pancytopenia                                             | HP:0001876      | 0           | 0           | 0           | 0           | 2           | 0           | 0           | <b>2</b>   | <b>56</b>         | <b>0.036</b>      |

|    |   |                                               |            |   |   |   |   |    |   |   |    |      |       |
|----|---|-----------------------------------------------|------------|---|---|---|---|----|---|---|----|------|-------|
| 39 | 2 | Abnormality of leukocytes                     | HP:0001881 | 0 | 0 | 0 | 0 | 2  | 0 | 0 | 2  | 418  | 0.005 |
| 40 | 3 | Abnormal leukocyte count                      | HP:0011893 | 0 | 0 | 0 | 0 | 2  | 0 | 0 | 2  | 218  | 0.009 |
| 41 | 4 | Leukocytosis                                  | HP:0001974 | 0 | 0 | 0 | 0 | 2  | 0 | 0 | 2  | 57   | 0.035 |
| 42 | 1 | Abnormality of connective tissue              | HP:0003549 | 0 | 0 | 0 | 0 | 1  | 1 | 0 | 2  | 1019 | 0.002 |
| 43 | 2 | Abnormality of adipose tissue                 | HP:0009124 | 0 | 0 | 0 | 0 | 1  | 1 | 0 | 2  | 157  | 0.013 |
| 44 | 3 | Lipodystrophy                                 | HP:0009125 | 0 | 0 | 0 | 0 | 2  | 0 | 0 | 2  | 84   | 0.024 |
| 45 | 3 | Abnormality of subcutaneous fat tissue        | HP:0001001 | 0 | 0 | 0 | 0 | 1  | 1 | 0 | 2  | 35   | 0.057 |
| 46 | 4 | Abnormal subcutaneous fat tissue distribution | HP:0007552 | 0 | 0 | 0 | 0 | 1  | 1 | 0 | 2  | 7    | 0.286 |
| 47 | 1 | Abnormality of head or neck                   | HP:0000152 | 3 | 1 | 1 | 4 | 15 | 6 | 2 | 32 | 2186 | 0.015 |
| 48 | 2 | Abnormality of the neck                       | HP:0000464 | 2 | 0 | 0 | 1 | 1  | 5 | 0 | 9  | 414  | 0.022 |
| 49 | 3 | Short neck                                    | HP:0000470 | 2 | 0 | 0 | 1 | 1  | 5 | 0 | 9  | 238  | 0.038 |
| 50 | 3 | Low posterior hairline                        | HP:0002162 | 1 | 0 | 0 | 0 | 0  | 0 | 0 | 1  | 69   | 0.014 |
| 51 | 2 | Abnormality of the head                       | HP:0000234 | 3 | 1 | 1 | 4 | 15 | 6 | 2 | 32 | 2160 | 0.015 |
| 52 | 3 | Abnormality of the face                       | HP:0000271 | 3 | 1 | 1 | 4 | 15 | 6 | 2 | 32 | 1954 | 0.016 |
| 53 | 4 | Abnormal facial shape                         | HP:0001999 | 0 | 0 | 0 | 0 | 0  | 1 | 0 | 1  | 625  | 0.002 |
| 54 | 5 | Flat face                                     | HP:0012368 | 0 | 0 | 0 | 0 | 0  | 1 | 0 | 1  | 69   | 0.014 |
| 55 | 4 | Abnormality of the forehead                   | HP:0000290 | 1 | 0 | 1 | 1 | 2  | 3 | 0 | 8  | 610  | 0.013 |
| 56 | 5 | Narrow forehead                               | HP:0000341 | 1 | 0 | 0 | 0 | 1  | 3 | 0 | 5  | 61   | 0.082 |
| 57 | 5 | Flat forehead                                 | HP:0004425 | 0 | 0 | 1 | 0 | 0  | 3 | 0 | 4  | 7    | 0.571 |
| 58 | 5 | Abnormality of the metopic suture             | HP:0005556 | 0 | 0 | 0 | 0 | 1  | 0 | 0 | 1  | 38   | 0.026 |
| 59 | 6 | Metopic synostosis                            | HP:0011330 | 0 | 0 | 0 | 0 | 1  | 0 | 0 | 1  | 3    | 0.333 |
| 60 | 5 | Abnormality of the frontal hairline           | HP:0000599 | 0 | 0 | 0 | 1 | 1  | 1 | 0 | 3  | 78   | 0.038 |
| 61 | 6 | Low anterior hairline                         | HP:0000294 | 0 | 0 | 0 | 1 | 1  | 1 | 0 | 3  | 52   | 0.058 |
| 62 | 4 | Abnormality of the nose                       | HP:0000366 | 1 | 0 | 0 | 2 | 5  | 3 | 1 | 12 | 1109 | 0.011 |
| 63 | 5 | Wide nose                                     | HP:0000445 | 0 | 0 | 0 | 0 | 0  | 3 | 1 | 4  | 73   | 0.055 |
| 64 | 5 | Abnormality of the nares                      | HP:0005288 | 1 | 0 | 0 | 0 | 1  | 0 | 0 | 2  | 377  | 0.005 |
| 65 | 6 | Anteverted nares                              | HP:0000463 | 1 | 0 | 0 | 0 | 1  | 0 | 0 | 2  | 363  | 0.006 |
| 66 | 7 | Broad nasal tip                               | HP:0000455 | 0 | 0 | 0 | 0 | 1  | 0 | 0 | 1  | 57   | 0.018 |
| 67 | 5 | Abnormal nasal morphology                     | HP:0005105 | 0 | 0 | 0 | 2 | 2  | 3 | 1 | 8  | 642  | 0.012 |
| 68 | 6 | Prominent nose                                | HP:0000448 | 0 | 0 | 0 | 2 | 2  | 0 | 1 | 5  | 45   | 0.111 |
| 69 | 6 | Short nose                                    | HP:0003196 | 0 | 0 | 0 | 0 | 0  | 3 | 0 | 3  | 204  | 0.015 |
| 70 | 5 | Abnormality of the nasal bridge               | HP:0000422 | 1 | 0 | 0 | 1 | 2  | 0 | 1 | 5  | 657  | 0.008 |
| 71 | 6 | Depressed nasal bridge                        | HP:0005280 | 0 | 0 | 0 | 0 | 1  | 0 | 1 | 2  | 307  | 0.007 |
| 72 | 6 | Wide nasal bridge                             | HP:0000431 | 1 | 0 | 0 | 1 | 1  | 0 | 0 | 3  | 352  | 0.009 |
| 73 | 4 | Abnormality of the mouth                      | HP:0000153 | 2 | 0 | 0 | 1 | 6  | 4 | 0 | 13 | 1417 | 0.009 |
| 74 | 5 | Abnormality of mouth size                     | HP:0011337 | 1 | 0 | 0 | 0 | 3  | 3 | 0 | 7  | 237  | 0.030 |
| 75 | 6 | Narrow mouth                                  | HP:0000160 | 1 | 0 | 0 | 0 | 0  | 3 | 0 | 4  | 136  | 0.029 |
| 76 | 6 | Wide mouth                                    | HP:0000154 | 0 | 0 | 0 | 0 | 3  | 0 | 0 | 3  | 113  | 0.027 |
| 77 | 5 | Abnormality of the oral cavity                | HP:0000163 | 1 | 0 | 0 | 1 | 5  | 3 | 0 | 10 | 1213 | 0.008 |
| 78 | 6 | Abnormality of the oral mucosa                | HP:0011830 | 0 | 0 | 0 | 0 | 1  | 2 | 0 | 3  | 205  | 0.015 |
| 79 | 7 | Abnormality of the gingiva                    | HP:0000168 | 0 | 0 | 0 | 0 | 1  | 2 | 0 | 3  | 144  | 0.021 |

|     |   |                                          |            |   |   |   |   |   |   |   |    |      |       |
|-----|---|------------------------------------------|------------|---|---|---|---|---|---|---|----|------|-------|
| 80  | 8 | Gingival overgrowth                      | HP:0000212 | 0 | 0 | 0 | 0 | 1 | 2 | 0 | 3  | 75   | 0.040 |
| 81  | 6 | Abnormality of the palate                | HP:0000174 | 1 | 0 | 0 | 1 | 1 | 0 | 0 | 3  | 677  | 0.004 |
| 82  | 7 | High palate                              | HP:0000218 | 1 | 0 | 0 | 1 | 1 | 0 | 0 | 3  | 389  | 0.008 |
| 83  | 6 | Abnormality of the tongue                | HP:0000157 | 0 | 0 | 0 | 0 | 0 | 1 | 0 | 1  | 238  | 0.004 |
| 84  | 7 | Protruding tongue                        | HP:0010808 | 0 | 0 | 0 | 0 | 0 | 1 | 0 | 1  | 19   | 0.053 |
| 85  | 6 | Abnormality of the teeth                 | HP:0000164 | 0 | 0 | 0 | 0 | 4 | 0 | 0 | 4  | 619  | 0.006 |
| 86  | 7 | Abnormal number of teeth                 | HP:0006483 | 0 | 0 | 0 | 0 | 1 | 0 | 0 | 1  | 200  | 0.005 |
| 87  | 8 | Reduced number of teeth                  | HP:0009804 | 0 | 0 | 0 | 0 | 1 | 0 | 0 | 1  | 183  | 0.005 |
| 88  | 7 | Abnormality of dental structure          | HP:0011061 | 0 | 0 | 0 | 0 | 3 | 0 | 0 | 3  | 256  | 0.012 |
| 89  | 8 | Carious teeth                            | HP:0000670 | 0 | 0 | 0 | 0 | 2 | 0 | 0 | 2  | 145  | 0.014 |
| 90  | 8 | Hypoplasia of teeth                      | HP:0000685 | 0 | 0 | 0 | 0 | 2 | 0 | 0 | 2  | 60   | 0.033 |
| 91  | 6 | Abnormality of the oral frenula          | HP:0000190 | 1 | 0 | 0 | 0 | 0 | 0 | 0 | 1  | 29   | 0.034 |
| 92  | 7 | Short lingual frenulum                   | HP:0000200 | 1 | 0 | 0 | 0 | 0 | 0 | 0 | 1  | 3    | 0.333 |
| 93  | 5 | Abnormality of the lip                   | HP:0000159 | 2 | 0 | 0 | 0 | 4 | 3 | 0 | 9  | 666  | 0.014 |
| 94  | 6 | Abnormality of upper lip                 | HP:0000177 | 2 | 0 | 0 | 0 | 1 | 2 | 0 | 5  | 517  | 0.010 |
| 95  | 7 | Abnormality of the philtrum              | HP:0000288 | 2 | 0 | 0 | 0 | 1 | 2 | 0 | 5  | 350  | 0.014 |
| 96  | 8 | Smooth philtrum                          | HP:0000319 | 1 | 0 | 0 | 0 | 0 | 2 | 0 | 3  | 69   | 0.043 |
| 97  | 8 | Long philtrum                            | HP:0000343 | 1 | 0 | 0 | 0 | 1 | 0 | 0 | 2  | 213  | 0.009 |
| 98  | 8 | Hypoplastic philtrum                     | HP:0005326 | 0 | 0 | 0 | 0 | 1 | 0 | 0 | 1  | 1    | 1.000 |
| 99  | 6 | Full lips                                | HP:0012471 | 0 | 0 | 0 | 0 | 1 | 1 | 0 | 2  | 155  | 0.013 |
| 100 | 6 | Thin vermilion border                    | HP:0000233 | 2 | 0 | 0 | 0 | 2 | 0 | 0 | 4  | 192  | 0.021 |
| 101 | 7 | Thin upper lip vermilion                 | HP:0000219 | 2 | 0 | 0 | 0 | 0 | 0 | 0 | 2  | 130  | 0.015 |
| 102 | 5 | Pierre-Robin sequence                    | HP:0000201 | 1 | 0 | 0 | 0 | 0 | 0 | 0 | 1  | 13   | 0.077 |
| 103 | 4 | Abnormality of the midface               | HP:0000309 | 1 | 0 | 0 | 0 | 0 | 3 | 0 | 4  | 375  | 0.008 |
| 104 | 5 | Abnormality of malar bones               | HP:0012369 | 0 | 0 | 0 | 0 | 0 | 3 | 0 | 3  | 182  | 0.016 |
| 105 | 6 | Malar flattening                         | HP:0000272 | 0 | 0 | 0 | 0 | 0 | 3 | 0 | 3  | 175  | 0.017 |
| 106 | 5 | Hypoplasia of midface                    | HP:0011800 | 1 | 0 | 0 | 0 | 0 | 0 | 0 | 1  | 167  | 0.006 |
| 107 | 4 | Abnormality of the orbital region        | HP:0000315 | 2 | 0 | 0 | 0 | 6 | 3 | 1 | 12 | 1220 | 0.010 |
| 108 | 5 | Abnormal morphology of the ocular adnexa | HP:0030669 | 2 | 0 | 0 | 0 | 6 | 3 | 1 | 12 | 949  | 0.013 |
| 109 | 6 | Abnormality of the eyelid                | HP:0000492 | 2 | 0 | 0 | 0 | 5 | 3 | 1 | 11 | 800  | 0.014 |
| 110 | 7 | Epicanthus                               | HP:0000286 | 0 | 0 | 0 | 0 | 3 | 0 | 1 | 4  | 316  | 0.013 |
| 111 | 7 | Abnormality of the palpebral fissures    | HP:0008050 | 2 | 0 | 0 | 0 | 3 | 3 | 0 | 8  | 481  | 0.017 |
| 112 | 8 | Slanting of the palpebral fissures       | HP:0200006 | 2 | 0 | 0 | 0 | 0 | 2 | 0 | 4  | 400  | 0.010 |
| 113 | 9 | Upslanted palpebral fissure              | HP:0000582 | 0 | 0 | 0 | 0 | 0 | 2 | 0 | 2  | 162  | 0.012 |
| 114 | 9 | Downslanted palpebral fissures           | HP:0000494 | 2 | 0 | 0 | 0 | 0 | 0 | 0 | 2  | 275  | 0.007 |
| 115 | 8 | Abnormal size of the palpebral fissures  | HP:0200007 | 0 | 0 | 0 | 0 | 3 | 3 | 0 | 6  | 159  | 0.038 |
| 116 | 9 | Short palpebral fissure                  | HP:0012745 | 0 | 0 | 0 | 0 | 0 | 3 | 0 | 3  | 70   | 0.043 |
| 117 | 9 | Long palpebral fissure                   | HP:0000637 | 0 | 0 | 0 | 0 | 3 | 0 | 0 | 3  | 25   | 0.120 |
| 118 | 6 | Abnormality of the eyebrow               | HP:0000534 | 0 | 0 | 0 | 0 | 1 | 0 | 0 | 1  | 362  | 0.003 |
| 119 | 7 | Laterally extended eyebrow               | HP:0011230 | 0 | 0 | 0 | 0 | 1 | 0 | 0 | 1  | 0    | 0.000 |
| 120 | 3 | Abnormality of the skull                 | HP:0000929 | 1 | 0 | 0 | 1 | 4 | 5 | 1 | 12 | 1454 | 0.008 |

|     |   |                                                 |            |   |   |   |   |   |   |   |    |      |       |
|-----|---|-------------------------------------------------|------------|---|---|---|---|---|---|---|----|------|-------|
| 121 | 4 | Abnormality of the calvaria                     | HP:0002683 | 0 | 0 | 0 | 0 | 1 | 0 | 0 | 1  | 689  | 0.001 |
| 122 | 5 | Abnormality of calvarial morphology             | HP:0002658 | 0 | 0 | 0 | 0 | 1 | 0 | 0 | 1  | 31   | 0.032 |
| 123 | 6 | Skull asymmetry                                 | HP:0002678 | 0 | 0 | 0 | 0 | 1 | 0 | 0 | 1  | 5    | 0.200 |
| 124 | 4 | Abnormality of the facial skeleton              | HP:0011821 | 1 | 0 | 0 | 1 | 3 | 5 | 1 | 11 | 780  | 0.014 |
| 125 | 5 | Abnormality of the mandible                     | HP:0000277 | 1 | 0 | 0 | 1 | 2 | 5 | 1 | 10 | 623  | 0.016 |
| 126 | 6 | Retrognathia                                    | HP:0000278 | 0 | 0 | 0 | 1 | 3 | 3 | 0 | 7  | 155  | 0.045 |
| 127 | 6 | Aplasia/hypoplasia of the mandible              | HP:0009118 | 1 | 0 | 0 | 0 | 0 | 2 | 1 | 4  | 493  | 0.008 |
| 128 | 7 | Micrognathia                                    | HP:0000347 | 1 | 0 | 0 | 0 | 0 | 2 | 1 | 4  | 489  | 0.008 |
| 129 | 1 | Abnormality of limbs                            | HP:0040064 | 3 | 0 | 0 | 2 | 4 | 4 | 2 | 15 | 1393 | 0.011 |
| 130 | 2 | Abnormality of the upper limb                   | HP:0002817 | 3 | 0 | 0 | 0 | 0 | 3 | 2 | 8  | 1007 | 0.008 |
| 131 | 3 | Abnormality of the hand                         | HP:0001155 | 3 | 0 | 0 | 0 | 0 | 3 | 2 | 8  | 929  | 0.009 |
| 132 | 4 | Split hand                                      | HP:0001171 | 0 | 0 | 0 | 0 | 0 | 0 | 1 | 1  | 54   | 0.019 |
| 133 | 4 | Aplasia/hypoplasia involving bones of the hand  | HP:0005927 | 1 | 0 | 0 | 0 | 0 | 0 | 1 | 2  | 329  | 0.006 |
| 134 | 5 | Small hand                                      | HP:0200055 | 1 | 0 | 0 | 0 | 0 | 0 | 1 | 2  | 74   | 0.027 |
| 135 | 4 | Deviation of the hand or of fingers of the hand | HP:0009484 | 1 | 0 | 0 | 0 | 0 | 2 | 0 | 3  | 318  | 0.009 |
| 136 | 5 | Ulnar deviation of the hand or of fingers       | HP:0001193 | 1 | 0 | 0 | 0 | 0 | 2 | 0 | 3  | 45   | 0.067 |
| 137 | 6 | Ulnar deviation of the hand                     | HP:0009487 | 0 | 0 | 0 | 0 | 0 | 2 | 0 | 2  | 13   | 0.154 |
| 138 | 6 | Ulnar deviation of finger                       | HP:0009465 | 1 | 0 | 0 | 0 | 0 | 0 | 0 | 1  | 33   | 0.030 |
| 139 | 4 | Abnormality of the palm                         | HP:0100871 | 1 | 0 | 0 | 0 | 0 | 3 | 0 | 4  | 265  | 0.015 |
| 140 | 5 | Abnormality of the skin of the palm             | HP:0040211 | 1 | 0 | 0 | 0 | 0 | 3 | 0 | 4  | 183  | 0.022 |
| 141 | 6 | Abnormal palmar dermatoglyphics                 | HP:0001018 | 1 | 0 | 0 | 0 | 0 | 3 | 0 | 4  | 133  | 0.030 |
| 142 | 7 | Abnormality of the palmar creases               | HP:0010490 | 1 | 0 | 0 | 0 | 0 | 3 | 0 | 4  | 128  | 0.031 |
| 143 | 8 | Simian crease                                   | HP:0000954 | 1 | 0 | 0 | 0 | 0 | 3 | 0 | 4  | 107  | 0.037 |
| 144 | 2 | Abnormality of the lower limb                   | HP:0002814 | 3 | 0 | 0 | 0 | 1 | 0 | 2 | 6  | 1039 | 0.006 |
| 145 | 3 | Abnormality of the lower limb bone              | HP:0040069 | 2 | 0 | 0 | 0 | 0 | 0 | 1 | 3  | 474  | 0.006 |
| 146 | 4 | Abnormality of the femur                        | HP:0002823 | 1 | 0 | 0 | 0 | 0 | 0 | 1 | 2  | 179  | 0.011 |
| 147 | 5 | Abnormality of the femoral neck or head region  | HP:0003366 | 1 | 0 | 0 | 0 | 0 | 0 | 1 | 2  | 112  | 0.018 |
| 148 | 6 | Abnormality of the femoral neck                 | HP:0003367 | 1 | 0 | 0 | 0 | 0 | 0 | 1 | 2  | 96   | 0.021 |
| 149 | 7 | Coxa valga                                      | HP:0003673 | 1 | 0 | 0 | 0 | 0 | 0 | 1 | 2  | 9    | 0.222 |
| 150 | 7 | Broad femoral neck                              | HP:0006429 | 1 | 0 | 0 | 0 | 0 | 0 | 0 | 1  | 8    | 0.125 |
| 151 | 3 | Abnormality of the foot                         | HP:0001760 | 1 | 0 | 0 | 0 | 1 | 0 | 2 | 4  | 862  | 0.005 |
| 152 | 4 | Aplasia/hypoplasia involving bones of the feet  | HP:0006494 | 1 | 0 | 0 | 0 | 0 | 0 | 1 | 2  | 202  | 0.010 |
| 153 | 5 | Short foot                                      | HP:0001773 | 1 | 0 | 0 | 0 | 0 | 0 | 1 | 2  | 103  | 0.019 |
| 154 | 4 | Positional foot deformity                       | HP:0005656 | 1 | 0 | 0 | 0 | 1 | 0 | 1 | 3  | 265  | 0.011 |
| 155 | 5 | Talipes                                         | HP:0001883 | 1 | 0 | 0 | 0 | 1 | 0 | 1 | 3  | 264  | 0.011 |
| 156 | 6 | Talipes equinovarus                             | HP:0001762 | 1 | 0 | 0 | 0 | 1 | 0 | 1 | 3  | 211  | 0.014 |
| 157 | 7 | Bilateral talipes equinovarus                   | HP:0001776 | 0 | 0 | 0 | 0 | 0 | 0 | 1 | 1  | 3    | 0.333 |
| 158 | 2 | Abnormality of limb bone                        | HP:0040068 | 0 | 0 | 0 | 2 | 4 | 4 | 1 | 11 | 1025 | 0.011 |
| 159 | 3 | Abnormality of limb bone morphology             | HP:0002813 | 0 | 0 | 0 | 2 | 4 | 4 | 1 | 11 | 1003 | 0.011 |
| 160 | 4 | Abnormality of the limb diaphysis               | HP:0006504 | 0 | 0 | 0 | 1 | 0 | 0 | 0 | 1  | 182  | 0.005 |
| 161 | 5 | Bowing of the long bones                        | HP:0006487 | 0 | 0 | 0 | 1 | 0 | 0 | 0 | 1  | 177  | 0.006 |

|     |   |                                                   |            |   |   |   |   |    |   |   |           |             |              |
|-----|---|---------------------------------------------------|------------|---|---|---|---|----|---|---|-----------|-------------|--------------|
| 162 | 6 | Bowing of the legs                                | HP:0002979 | 0 | 0 | 0 | 1 | 0  | 0 | 0 | <b>1</b>  | <b>131</b>  | <b>0.008</b> |
| 163 | 7 | Genu valgum                                       | HP:0002857 | 0 | 0 | 0 | 1 | 0  | 0 | 0 | <b>1</b>  | <b>82</b>   | <b>0.012</b> |
| 164 | 4 | Abnormality of digit                              | HP:0011297 | 0 | 0 | 0 | 1 | 4  | 4 | 1 | <b>10</b> | <b>885</b>  | <b>0.011</b> |
| 165 | 5 | Clinodactyly                                      | HP:0030084 | 0 | 0 | 0 | 1 | 0  | 0 | 1 | <b>2</b>  | <b>303</b>  | <b>0.007</b> |
| 166 | 6 | Finger clinodactyly                               | HP:0040019 | 0 | 0 | 0 | 1 | 0  | 0 | 0 | <b>1</b>  | <b>232</b>  | <b>0.004</b> |
| 167 | 6 | Toe clinodactyly                                  | HP:0001863 | 0 | 0 | 0 | 0 | 0  | 0 | 1 | <b>1</b>  | <b>13</b>   | <b>0.077</b> |
| 168 | 5 | Polydactyly                                       | HP:0010442 | 0 | 0 | 0 | 0 | 2  | 0 | 0 | <b>2</b>  | <b>191</b>  | <b>0.010</b> |
| 169 | 5 | Abnormality of the finger                         | HP:0001167 | 0 | 0 | 0 | 0 | 2  | 4 | 0 | <b>6</b>  | <b>720</b>  | <b>0.008</b> |
| 170 | 6 | Deviation of finger                               | HP:0004097 | 0 | 0 | 0 | 0 | 0  | 3 | 0 | <b>3</b>  | <b>305</b>  | <b>0.010</b> |
| 171 | 7 | Overlapping fingers                               | HP:0010557 | 0 | 0 | 0 | 0 | 0  | 3 | 0 | <b>3</b>  | <b>18</b>   | <b>0.167</b> |
| 172 | 6 | Long fingers                                      | HP:0100807 | 0 | 0 | 0 | 0 | 1  | 2 | 0 | <b>3</b>  | <b>160</b>  | <b>0.019</b> |
| 173 | 6 | Abnormality of the thumb                          | HP:0001172 | 0 | 0 | 0 | 0 | 1  | 4 | 0 | <b>5</b>  | <b>242</b>  | <b>0.021</b> |
| 174 | 7 | Adducted thumbs                                   | HP:0001181 | 0 | 0 | 0 | 0 | 1  | 4 | 0 | <b>5</b>  | <b>56</b>   | <b>0.089</b> |
| 175 | 6 | Slender finger                                    | HP:0001238 | 0 | 0 | 0 | 0 | 1  | 1 | 0 | <b>2</b>  | <b>95</b>   | <b>0.021</b> |
| 176 | 5 | Abnormality of toe                                | HP:0001780 | 0 | 0 | 0 | 0 | 0  | 2 | 1 | <b>3</b>  | <b>427</b>  | <b>0.007</b> |
| 177 | 6 | Overlapping toes                                  | HP:0001845 | 0 | 0 | 0 | 0 | 0  | 1 | 0 | <b>1</b>  | <b>19</b>   | <b>0.053</b> |
| 178 | 6 | Widely spaced toes                                | HP:0008094 | 0 | 0 | 0 | 0 | 0  | 0 | 1 | <b>1</b>  | <b>2</b>    | <b>0.500</b> |
| 179 | 6 | Long toes                                         | HP:0010511 | 0 | 0 | 0 | 0 | 0  | 2 | 0 | <b>2</b>  | <b>23</b>   | <b>0.087</b> |
| 180 | 7 | Long hallux                                       | HP:0001847 | 0 | 0 | 0 | 0 | 0  | 1 | 0 | <b>1</b>  | <b>9</b>    | <b>0.111</b> |
| 181 | 1 | Abnormality of metabolism/homeostasis             | HP:0001939 | 0 | 1 | 2 | 1 | 11 | 8 | 2 | <b>25</b> | <b>1708</b> | <b>0.015</b> |
| 182 | 2 | Abnormality of fluid regulation                   | HP:0011032 | 0 | 0 | 0 | 0 | 0  | 1 | 0 | <b>1</b>  | <b>374</b>  | <b>0.003</b> |
| 183 | 3 | Dehydration                                       | HP:0001944 | 0 | 0 | 0 | 0 | 0  | 1 | 0 | <b>1</b>  | <b>70</b>   | <b>0.014</b> |
| 184 | 2 | Abnormality of temperature regulation             | HP:0004370 | 0 | 0 | 0 | 0 | 11 | 8 | 1 | <b>20</b> | <b>244</b>  | <b>0.082</b> |
| 185 | 3 | Fever                                             | HP:0001945 | 0 | 0 | 0 | 0 | 11 | 8 | 1 | <b>20</b> | <b>180</b>  | <b>0.111</b> |
| 186 | 4 | Episodic fever                                    | HP:0001954 | 0 | 0 | 0 | 0 | 11 | 8 | 1 | <b>20</b> | <b>22</b>   | <b>0.909</b> |
| 187 | 2 | Abnormality of cell physiology                    | HP:0011017 | 0 | 0 | 0 | 0 | 1  | 0 | 0 | <b>1</b>  | <b>326</b>  | <b>0.003</b> |
| 188 | 3 | Abnormality of B cell physiology                  | HP:0005372 | 0 | 0 | 0 | 0 | 1  | 0 | 0 | <b>1</b>  | <b>142</b>  | <b>0.007</b> |
| 189 | 4 | Absent specific antibody respons                  | HP:0005424 | 0 | 0 | 0 | 0 | 1  | 0 | 0 | <b>1</b>  | <b>1</b>    | <b>1.000</b> |
| 190 | 2 | Abnormality of ion homeostasis                    | HP:0003111 | 0 | 1 | 0 | 0 | 1  | 0 | 0 | <b>2</b>  | <b>225</b>  | <b>0.009</b> |
| 191 | 3 | Abnormality of cation homeostasis                 | HP:0010929 | 0 | 1 | 0 | 0 | 1  | 0 | 0 | <b>2</b>  | <b>203</b>  | <b>0.010</b> |
| 192 | 4 | Abnormality of the transition element cation hom. | HP:0011030 | 0 | 1 | 0 | 0 | 1  | 0 | 0 | <b>2</b>  | <b>37</b>   | <b>0.054</b> |
| 193 | 5 | Abnormality of iron homeostasis                   | HP:0011031 | 0 | 0 | 0 | 0 | 1  | 0 | 0 | <b>1</b>  | <b>28</b>   | <b>0.036</b> |
| 194 | 6 | Abnormal serum ferritin                           | HP:0040133 | 0 | 0 | 0 | 0 | 1  | 0 | 0 | <b>1</b>  | <b>22</b>   | <b>0.045</b> |
| 195 | 7 | Increased serum ferritin                          | HP:0003281 | 0 | 0 | 0 | 0 | 1  | 0 | 0 | <b>1</b>  | <b>22</b>   | <b>0.045</b> |
| 196 | 5 | Abnormality of copper homeostasis                 | HP:0010836 | 0 | 1 | 0 | 0 | 0  | 0 | 0 | <b>1</b>  | <b>9</b>    | <b>0.111</b> |
| 197 | 6 | Hypocupremia                                      | HP:0011967 | 0 | 1 | 0 | 0 | 0  | 0 | 0 | <b>1</b>  | <b>3</b>    | <b>0.333</b> |
| 198 | 6 | Decreased serum ceruloplasmin                     | HP:0010837 | 0 | 1 | 0 | 0 | 0  | 0 | 0 | <b>1</b>  | <b>6</b>    | <b>0.167</b> |
| 199 | 2 | Abnormal enzyme/coenzyme activity                 | HP:0012379 | 0 | 0 | 1 | 1 | 2  | 0 | 0 | <b>4</b>  | <b>99</b>   | <b>0.040</b> |
| 200 | 3 | Abnormality of alkaline phosphatase activity      | HP:0004379 | 0 | 0 | 1 | 1 | 2  | 0 | 0 | <b>4</b>  | <b>61</b>   | <b>0.066</b> |
| 201 | 4 | Elevated alkaline phosphatase                     | HP:0003155 | 0 | 0 | 1 | 1 | 2  | 0 | 0 | <b>4</b>  | <b>58</b>   | <b>0.069</b> |
| 202 | 2 | Abnormality of circulating protein level          | HP:0010876 | 0 | 0 | 1 | 1 | 5  | 3 | 2 | <b>12</b> | <b>302</b>  | <b>0.040</b> |

|     |   |                                                    |            |   |   |   |   |    |   |   |           |            |              |
|-----|---|----------------------------------------------------|------------|---|---|---|---|----|---|---|-----------|------------|--------------|
| 203 | 3 | Abnormality of circulating enzyme level            | HP:0011021 | 0 | 0 | 0 | 0 | 3  | 3 | 2 | <b>8</b>  | <b>212</b> | <b>0.038</b> |
| 204 | 4 | Abnormal levels of creatine kinase in blood        | HP:0040081 | 0 | 0 | 0 | 0 | 3  | 3 | 2 | <b>8</b>  | <b>211</b> | <b>0.038</b> |
| 205 | 5 | Elevated serum creatine phosphokinase              | HP:0003236 | 0 | 0 | 0 | 0 | 3  | 3 | 2 | <b>8</b>  | <b>209</b> | <b>0.038</b> |
| 206 | 3 | Abnormal levels of alpha feto-protein              | HP:0045056 | 0 | 0 | 1 | 1 | 2  | 0 | 0 | <b>4</b>  | <b>13</b>  | <b>0.308</b> |
| 207 | 4 | Elevated alpha feto-protein                        | HP:0006254 | 0 | 0 | 1 | 1 | 2  | 0 | 0 | <b>4</b>  | <b>12</b>  | <b>0.333</b> |
| 208 | 2 | Abnormality of carbohydrate metabolism/homeostasis | HP:0011013 | 0 | 0 | 0 | 0 | 0  | 1 | 0 | <b>1</b>  | <b>528</b> | <b>0.002</b> |
| 209 | 3 | Abnormal glucose homeostasis                       | HP:0011014 | 0 | 0 | 0 | 0 | 0  | 1 | 0 | <b>1</b>  | <b>468</b> | <b>0.002</b> |
| 210 | 4 | Abnormality of blood glucose concentration         | HP:0011015 | 0 | 0 | 0 | 0 | 0  | 1 | 0 | <b>1</b>  | <b>178</b> | <b>0.006</b> |
| 211 | 5 | Hypoglycaemia                                      | HP:0001943 | 0 | 0 | 0 | 0 | 0  | 1 | 0 | <b>1</b>  | <b>157</b> | <b>0.006</b> |
| 212 | 6 | Recurrent hypoglycaemia                            | HP:0001988 | 0 | 0 | 0 | 0 | 0  | 1 | 0 | <b>1</b>  | <b>8</b>   | <b>0.125</b> |
| 213 | 2 | Abnormality of lipid metabolism                    | HP:0003119 | 0 | 0 | 1 | 0 | 0  | 0 | 0 | <b>1</b>  | <b>180</b> | <b>0.006</b> |
| 214 | 3 | Abnormality of cholesterol metabolism              | HP:0003107 | 0 | 0 | 1 | 0 | 0  | 0 | 0 | <b>1</b>  | <b>64</b>  | <b>0.016</b> |
| 215 | 4 | Hypercholesterolemia                               | HP:0003124 | 0 | 0 | 1 | 0 | 0  | 0 | 0 | <b>1</b>  | <b>33</b>  | <b>0.030</b> |
| 216 | 2 | Hyperbilirubinemia                                 | HP:0002904 | 0 | 0 | 0 | 1 | 1  | 0 | 0 | <b>2</b>  | <b>52</b>  | <b>0.038</b> |
| 217 | 3 | Unconjugated hyperbilirubinemia                    | HP:0008282 | 0 | 0 | 0 | 1 | 0  | 0 | 0 | <b>1</b>  | <b>5</b>   | <b>0.200</b> |
| 218 | 3 | Conjugated hyperbilirubinemia                      | HP:0002908 | 0 | 0 | 0 | 0 | 1  | 0 | 0 | <b>1</b>  | <b>17</b>  | <b>0.059</b> |
| 219 | 2 | Abnormality of vitamin metabolism                  | HP:0100508 | 0 | 0 | 0 | 0 | 1  | 0 | 0 | <b>1</b>  | <b>58</b>  | <b>0.017</b> |
| 220 | 3 | Abnormality of vitamin K metabolism                | HP:0100831 | 0 | 0 | 0 | 0 | 1  | 0 | 0 | <b>1</b>  | <b>6</b>   | <b>0.167</b> |
| 221 | 4 | Vitamin K deficiency                               | HP:0011892 | 0 | 0 | 0 | 0 | 1  | 0 | 0 | <b>1</b>  | <b>6</b>   | <b>0.167</b> |
| 222 | 1 | Abnormality of prenatal development or birth       | HP:0001197 | 0 | 0 | 0 | 1 | 6  | 1 | 0 | <b>8</b>  | <b>465</b> | <b>0.017</b> |
| 223 | 2 | Abnormality of the amniotic fluid                  | HP:0001560 | 0 | 0 | 0 | 1 | 2  | 1 | 0 | <b>4</b>  | <b>227</b> | <b>0.018</b> |
| 224 | 3 | Oligohydramnios                                    | HP:0001562 | 0 | 0 | 0 | 1 | 1  | 1 | 0 | <b>3</b>  | <b>88</b>  | <b>0.034</b> |
| 225 | 3 | Polyhydramnios                                     | HP:0001561 | 0 | 0 | 0 | 0 | 1  | 0 | 0 | <b>1</b>  | <b>143</b> | <b>0.007</b> |
| 226 | 2 | Hydrops fetalis                                    | HP:0001789 | 0 | 0 | 0 | 0 | 1  | 0 | 0 | <b>1</b>  | <b>44</b>  | <b>0.023</b> |
| 227 | 2 | Premature birth                                    | HP:0001622 | 0 | 0 | 0 | 0 | 4  | 0 | 0 | <b>4</b>  | <b>100</b> | <b>0.040</b> |
| 228 | 2 | Prenatal movement abnormality                      | HP:0001557 | 0 | 0 | 0 | 0 | 1  | 0 | 0 | <b>1</b>  | <b>112</b> | <b>0.009</b> |
| 229 | 3 | Decreased fetal movement                           | HP:0001558 | 0 | 0 | 0 | 0 | 1  | 0 | 0 | <b>1</b>  | <b>101</b> | <b>0.010</b> |
| 230 | 1 | Abnormality of the abdomen                         | HP:0001438 | 1 | 1 | 2 | 3 | 12 | 8 | 3 | <b>30</b> | <b>544</b> | <b>0.055</b> |
| 231 | 2 | Abnormality of the abdominal organs                | HP:0002012 | 1 | 1 | 2 | 3 | 12 | 8 | 3 | <b>30</b> | <b>895</b> | <b>0.034</b> |
| 232 | 3 | Abnormality of the liver                           | HP:0001392 | 1 | 1 | 2 | 2 | 12 | 7 | 2 | <b>27</b> | <b>769</b> | <b>0.035</b> |
| 233 | 4 | Decreased liver function                           | HP:0001410 | 0 | 1 | 0 | 0 | 2  | 0 | 0 | <b>3</b>  | <b>171</b> | <b>0.018</b> |
| 234 | 5 | Hepatic failure                                    | HP:0001399 | 0 | 0 | 0 | 0 | 2  | 0 | 0 | <b>2</b>  | <b>137</b> | <b>0.015</b> |
| 235 | 4 | Hepatomegaly                                       | HP:0002240 | 1 | 0 | 1 | 2 | 6  | 5 | 0 | <b>15</b> | <b>392</b> | <b>0.038</b> |
| 236 | 4 | Elevated hepatic transaminases                     | HP:0002910 | 0 | 0 | 2 | 1 | 12 | 5 | 2 | <b>22</b> | <b>157</b> | <b>0.140</b> |
| 237 | 4 | Cirrhosis                                          | HP:0001394 | 0 | 0 | 1 | 1 | 2  | 0 | 0 | <b>4</b>  | <b>112</b> | <b>0.036</b> |
| 238 | 4 | Hepatic necrosis                                   | HP:0002605 | 0 | 0 | 0 | 0 | 1  | 0 | 0 | <b>1</b>  | <b>25</b>  | <b>0.040</b> |
| 239 | 4 | Abnormality of the biliary system                  | HP:0004297 | 0 | 0 | 1 | 1 | 5  | 3 | 0 | <b>10</b> | <b>262</b> | <b>0.038</b> |
| 240 | 5 | Cholestasis                                        | HP:0001396 | 0 | 0 | 1 | 1 | 5  | 3 | 0 | <b>10</b> | <b>187</b> | <b>0.053</b> |
| 241 | 6 | Jaundice                                           | HP:0000952 | 0 | 0 | 0 | 1 | 1  | 2 | 0 | <b>4</b>  | <b>145</b> | <b>0.028</b> |
| 242 | 4 | Abnormality of the hepatic vasculature             | HP:0006707 | 0 | 0 | 0 | 1 | 0  | 0 | 0 | <b>1</b>  | <b>48</b>  | <b>0.021</b> |
| 243 | 5 | Portal hypertension                                | HP:0001409 | 0 | 0 | 0 | 1 | 0  | 0 | 0 | <b>1</b>  | <b>46</b>  | <b>0.022</b> |



|     |   |                                                 |            |   |   |   |   |   |   |   |    |      |       |
|-----|---|-------------------------------------------------|------------|---|---|---|---|---|---|---|----|------|-------|
| 244 | 4 | Hepatitis                                       | HP:0012115 | 0 | 0 | 1 | 0 | 0 | 0 | 1 | 2  | 64   | 0.031 |
| 245 | 3 | Abnormality of the spleen                       | HP:0001743 | 1 | 0 | 1 | 1 | 8 | 2 | 0 | 13 | 373  | 0.035 |
| 246 | 4 | Splenomegaly                                    | HP:0001744 | 1 | 0 | 1 | 1 | 8 | 2 | 0 | 13 | 290  | 0.045 |
| 247 | 3 | Abnormality of the gastrointestinal tract       | HP:0011024 | 0 | 0 | 0 | 2 | 3 | 5 | 1 | 11 | 980  | 0.011 |
| 248 | 4 | Morphological abnormality of the GI tract       | HP:0012718 | 0 | 0 | 0 | 2 | 3 | 1 | 1 | 7  | 752  | 0.009 |
| 249 | 5 | Abnormality of the esophagus                    | HP:0002031 | 0 | 0 | 0 | 1 | 2 | 1 | 0 | 4  | 141  | 0.028 |
| 250 | 6 | Gastroesophageal reflux                         | HP:0002020 | 0 | 0 | 0 | 1 | 0 | 1 | 0 | 2  | 170  | 0.012 |
| 251 | 6 | Esophageal varix                                | HP:0002040 | 0 | 0 | 0 | 0 | 1 | 0 | 0 | 1  | 18   | 0.056 |
| 252 | 6 | Dysphagia                                       | HP:0002015 | 0 | 0 | 0 | 0 | 1 | 0 | 0 | 1  | 207  | 0.005 |
| 253 | 5 | Abnormality of the large intestine              | HP:0002250 | 0 | 0 | 0 | 0 | 0 | 0 | 1 | 1  | 144  | 0.007 |
| 254 | 6 | Abnormal large intestine physiology             | HP:0012700 | 0 | 0 | 0 | 0 | 0 | 0 | 1 | 1  | 35   | 0.029 |
| 255 | 7 | Bowel incontinence                              | HP:0002607 | 0 | 0 | 0 | 0 | 0 | 0 | 1 | 1  | 29   | 0.034 |
| 256 | 5 | Anorectal anomaly                               | HP:0012732 | 0 | 0 | 0 | 1 | 1 | 0 | 0 | 2  | 208  | 0.010 |
| 257 | 6 | Abnormality of the anus                         | HP:0004378 | 0 | 0 | 0 | 1 | 1 | 0 | 0 | 2  | 147  | 0.014 |
| 258 | 7 | Ectopic anus                                    | HP:0004397 | 0 | 0 | 0 | 0 | 1 | 0 | 0 | 1  | 35   | 0.029 |
| 259 | 8 | Anus anteposition                               | HP:0001545 | 0 | 0 | 0 | 0 | 1 | 0 | 0 | 1  | 16   | 0.063 |
| 260 | 7 | Anal stenosis                                   | HP:0002025 | 0 | 0 | 0 | 1 | 0 | 0 | 0 | 1  | 27   | 0.037 |
| 261 | 4 | Functional abnormality of the GI tract          | HP:0012719 | 0 | 0 | 0 | 0 | 2 | 4 | 0 | 6  | 547  | 0.011 |
| 262 | 5 | Gastrointestinal obstruction                    | HP:0004796 | 0 | 0 | 0 | 0 | 0 | 3 | 0 | 3  | 68   | 0.044 |
| 263 | 5 | Gastrointestinal inflammation                   | HP:0004386 | 0 | 0 | 0 | 0 | 2 | 1 | 0 | 3  | 51   | 0.059 |
| 264 | 6 | Inflammation of the large intestine             | HP:0002037 | 0 | 0 | 0 | 0 | 2 | 1 | 0 | 3  | 28   | 0.107 |
| 265 | 7 | Colitis                                         | HP:0002583 | 0 | 0 | 0 | 0 | 1 | 0 | 0 | 1  | 22   | 0.045 |
| 266 | 8 | Acute colitis                                   | HP:0100282 | 0 | 0 | 0 | 0 | 1 | 0 | 0 | 1  | 5    | 0.200 |
| 267 | 9 | Enterocolitis                                   | HP:0004387 | 0 | 0 | 0 | 0 | 1 | 0 | 0 | 1  | 5    | 0.200 |
| 268 | 2 | Abdominal symptom                               | HP:0011458 | 1 | 0 | 1 | 2 | 6 | 6 | 0 | 16 | 995  | 0.016 |
| 269 | 3 | Anorexia                                        | HP:0002039 | 0 | 0 | 0 | 0 | 1 | 0 | 0 | 1  | 64   | 0.016 |
| 270 | 3 | Nausea and vomiting                             | HP:0002017 | 0 | 0 | 0 | 0 | 2 | 0 | 0 | 2  | 307  | 0.007 |
| 271 | 4 | Vomiting                                        | HP:0002013 | 0 | 0 | 0 | 0 | 2 | 0 | 0 | 2  | 161  | 0.012 |
| 272 | 3 | Diarrhea                                        | HP:0002014 | 0 | 0 | 1 | 0 | 4 | 2 | 0 | 7  | 205  | 0.034 |
| 273 | 3 | Feeding difficulties                            | HP:0011968 | 1 | 0 | 1 | 2 | 1 | 6 | 0 | 11 | 529  | 0.021 |
| 274 | 1 | Abnormality of the breast                       | HP:0000769 | 1 | 0 | 0 | 0 | 3 | 1 | 0 | 5  | 273  | 0.018 |
| 275 | 2 | Abnormality of the nipple                       | HP:0004404 | 0 | 0 | 0 | 0 | 3 | 1 | 0 | 4  | 135  | 0.030 |
| 276 | 3 | Inverted nipples                                | HP:0003186 | 0 | 0 | 0 | 0 | 3 | 1 | 0 | 4  | 14   | 0.286 |
| 277 | 2 | Abnormal intermamillary distance                | HP:0040157 | 1 | 0 | 0 | 0 | 0 | 0 | 0 | 1  | 72   | 0.014 |
| 278 | 3 | Wide intermamillary distance                    | HP:0006610 | 1 | 0 | 0 | 0 | 0 | 0 | 0 | 1  | 72   | 0.014 |
| 279 | 1 | Abnormality of the cardiovascular system        | HP:0001626 | 2 | 0 | 0 | 0 | 6 | 4 | 0 | 12 | 1667 | 0.007 |
| 280 | 2 | Abnormality of cardiovascular system morphology | HP:0030680 | 2 | 0 | 0 | 0 | 6 | 3 | 0 | 11 | 1149 | 0.010 |
| 281 | 3 | Abnormal heart morphology                       | HP:0001627 | 2 | 0 | 0 | 0 | 6 | 3 | 0 | 11 | 910  | 0.012 |
| 282 | 4 | Abnormality of the heart valves                 | HP:0001654 | 1 | 0 | 0 | 0 | 1 | 1 | 0 | 3  | 305  | 0.010 |
| 283 | 5 | Abnormality of the aortic valve                 | HP:0001646 | 1 | 0 | 0 | 0 | 1 | 0 | 0 | 2  | 167  | 0.012 |
| 284 | 6 | Aortic regurgitation                            | HP:0001659 | 1 | 0 | 0 | 0 | 1 | 0 | 0 | 2  | 59   | 0.034 |

|     |   |                                                 |            |   |   |   |   |   |   |   |    |      |       |
|-----|---|-------------------------------------------------|------------|---|---|---|---|---|---|---|----|------|-------|
| 285 | 6 | Dysplastic aortic valve                         | HP:0005176 | 0 | 0 | 0 | 0 | 1 | 0 | 0 | 1  | 0    | 0.000 |
| 286 | 5 | Abnormality of the atrioventricular valves      | HP:0006705 | 1 | 0 | 0 | 0 | 0 | 1 | 0 | 2  | 148  | 0.014 |
| 287 | 6 | Abnormality of the mitral valve                 | HP:0001633 | 1 | 0 | 0 | 0 | 0 | 0 | 0 | 1  | 126  | 0.008 |
| 288 | 7 | Mitral stenosis                                 | HP:0001718 | 1 | 0 | 0 | 0 | 0 | 0 | 0 | 1  | 12   | 0.083 |
| 289 | 8 | Parachute mitral valve                          | HP:0011571 | 1 | 0 | 0 | 0 | 0 | 0 | 0 | 1  | 0    | 0.000 |
| 290 | 6 | Abnormality of the tricuspid valve              | HP:0001702 | 0 | 0 | 0 | 0 | 0 | 1 | 0 | 1  | 36   | 0.028 |
| 291 | 7 | Tricuspid insufficiency                         | HP:0005180 | 0 | 0 | 0 | 0 | 0 | 1 | 0 | 1  | 17   | 0.059 |
| 292 | 4 | Abnormality of cardiac atrium                   | HP:0005120 | 1 | 0 | 0 | 0 | 4 | 2 | 0 | 7  | 244  | 0.029 |
| 293 | 5 | Atrial septal defect                            | HP:0001631 | 0 | 0 | 0 | 0 | 4 | 2 | 0 | 6  | 241  | 0.025 |
| 294 | 6 | Secundum atrial septal defect                   | HP:0001684 | 0 | 0 | 0 | 0 | 1 | 2 | 0 | 3  | 7    | 0.429 |
| 295 | 6 | Patent foramen ovale                            | HP:0001655 | 0 | 0 | 0 | 0 | 1 | 0 | 0 | 1  | 26   | 0.038 |
| 296 | 4 | Abnormality of cardiac ventricle                | HP:0001713 | 1 | 0 | 0 | 0 | 2 | 3 | 0 | 6  | 342  | 0.018 |
| 297 | 5 | Abnormality of the ventricular septum           | HP:0010438 | 0 | 0 | 0 | 0 | 2 | 3 | 0 | 5  | 245  | 0.020 |
| 298 | 6 | Ventricular septal defect                       | HP:0001629 | 0 | 0 | 0 | 0 | 2 | 3 | 0 | 5  | 240  | 0.021 |
| 299 | 5 | Ventricular hypertrophy                         | HP:0001714 | 1 | 0 | 0 | 0 | 0 | 0 | 0 | 1  | 74   | 0.014 |
| 300 | 6 | Left ventricular hypertrophy                    | HP:0001712 | 1 | 0 | 0 | 0 | 0 | 0 | 0 | 1  | 54   | 0.019 |
| 301 | 4 | Hypoplastic heart                               | HP:0001961 | 0 | 0 | 0 | 0 | 1 | 0 | 0 | 1  | 22   | 0.045 |
| 302 | 3 | Congenital malformation of the great arteries   | HP:0011603 | 0 | 0 | 0 | 0 | 3 | 0 | 0 | 3  | 240  | 0.013 |
| 303 | 4 | Persistent ductus arteriosus                    | HP:0001643 | 0 | 0 | 0 | 0 | 3 | 0 | 0 | 3  | 192  | 0.016 |
| 304 | 2 | Abnormality of cardiovascular system physiology | HP:0011025 | 0 | 0 | 0 | 0 | 0 | 2 | 0 | 2  | 775  | 0.003 |
| 305 | 3 | Arrhythmia                                      | HP:0011675 | 0 | 0 | 0 | 0 | 0 | 1 | 0 | 1  | 311  | 0.003 |
| 306 | 4 | Tachycardia                                     | HP:0001649 | 0 | 0 | 0 | 0 | 0 | 1 | 0 | 1  | 99   | 0.010 |
| 307 | 3 | Congestive heart failure                        | HP:0001635 | 0 | 0 | 0 | 0 | 0 | 1 | 0 | 1  | 160  | 0.006 |
| 308 | 1 | Abnormality of the ear                          | HP:0000598 | 2 | 0 | 0 | 4 | 1 | 6 | 0 | 13 | 1466 | 0.009 |
| 309 | 2 | Hearing abnormality                             | HP:0000364 | 2 | 0 | 0 | 2 | 1 | 2 | 0 | 7  | 986  | 0.007 |
| 310 | 3 | Hearing impairment                              | HP:0000365 | 2 | 0 | 0 | 2 | 1 | 2 | 0 | 7  | 969  | 0.007 |
| 311 | 4 | Severe hearing impairment                       | HP:0012714 | 2 | 0 | 0 | 2 | 1 | 2 | 0 | 7  | 5    | 1.400 |
| 312 | 5 | Severe sensorineural hearing impairment         | HP:0008625 | 0 | 0 | 0 | 2 | 1 | 2 | 0 | 5  | 5    | 1.000 |
| 313 | 5 | Severe conductive hearing impairment            | HP:0012717 | 1 | 0 | 0 | 0 | 0 | 0 | 0 | 1  | 0    | 0.000 |
| 314 | 5 | Mixed hearing impairment                        | HP:0000410 | 1 | 0 | 0 | 0 | 0 | 0 | 0 | 1  | 18   | 0.056 |
| 315 | 2 | Abnormality of the outer ear                    | HP:0000356 | 2 | 0 | 0 | 3 | 0 | 5 | 0 | 10 | 760  | 0.013 |
| 316 | 3 | Abnormal location of ears                       | HP:0000357 | 2 | 0 | 0 | 3 | 0 | 5 | 0 | 10 | 490  | 0.020 |
| 317 | 4 | Low set ears                                    | HP:0000369 | 2 | 0 | 0 | 3 | 0 | 5 | 0 | 10 | 463  | 0.022 |
| 318 | 4 | Posteriorly rotated ears                        | HP:0000358 | 2 | 0 | 0 | 3 | 0 | 2 | 0 | 7  | 289  | 0.024 |
| 319 | 3 | Abnormality of the pinna                        | HP:0000377 | 0 | 0 | 0 | 0 | 0 | 2 | 0 | 2  | 493  | 0.004 |
| 320 | 4 | Abnormality of the helix                        | HP:0011039 | 1 | 0 | 0 | 0 | 0 | 0 | 0 | 1  | 93   | 0.011 |
| 321 | 5 | Cleft helix                                     | HP:0009902 | 1 | 0 | 0 | 0 | 0 | 0 | 0 | 1  | 2    | 0.500 |
| 322 | 4 | Abnormality of the antihelix                    | HP:0009738 | 1 | 0 | 0 | 0 | 0 | 0 | 0 | 1  | 23   | 0.043 |
| 323 | 4 | Microtia                                        | HP:0008551 | 1 | 0 | 0 | 0 | 0 | 0 | 0 | 1  | 86   | 0.012 |
| 324 | 3 | Abnormality of the auditory canal               | HP:0000372 | 1 | 0 | 0 | 0 | 0 | 0 | 0 | 1  | 61   | 0.016 |
| 325 | 4 | Stenosis of the external auditory canal         | HP:0000402 | 1 | 0 | 0 | 0 | 0 | 0 | 0 | 1  | 24   | 0.042 |

|     |   |                                                               |            |   |   |   |   |   |   |   |    |      |       |
|-----|---|---------------------------------------------------------------|------------|---|---|---|---|---|---|---|----|------|-------|
| 326 | 2 | Abnormality of the middle ear                                 | HP:0000370 | 1 | 0 | 0 | 0 | 0 | 0 | 0 | 1  | 334  | 0.003 |
| 327 | 3 | Morphological abnormality of the middle ear                   | HP:0008609 | 1 | 0 | 0 | 0 | 0 | 0 | 0 | 1  | 16   | 0.063 |
| 328 | 4 | Cholesteatoma                                                 | HP:0009797 | 1 | 0 | 0 | 0 | 0 | 0 | 0 | 1  | 2    | 0.500 |
| 329 | 2 | Abnormality of the inner ear                                  | HP:0000359 | 1 | 0 | 0 | 0 | 0 | 0 | 0 | 1  | 674  | 0.001 |
| 330 | 3 | Morphological abnormality of the inner ear                    | HP:0011390 | 1 | 0 | 0 | 0 | 0 | 0 | 0 | 1  | 55   | 0.018 |
| 331 | 4 | Morphological abnormality of the vestibule of the inner ear   | HP:0011376 | 1 | 0 | 0 | 0 | 0 | 0 | 0 | 1  | 20   | 0.050 |
| 332 | 5 | Morphological abnormality of the semicircular channel         | HP:0011380 | 1 | 0 | 0 | 0 | 0 | 0 | 0 | 1  | 17   | 0.059 |
| 333 | 6 | Morphological abnormality of the lateral semicircular channel | HP:0040106 | 1 | 0 | 0 | 0 | 0 | 0 | 0 | 1  | 0    | 0.000 |
| 334 | 1 | Abnormality of the endocrine system                           | HP:0000818 | 0 | 0 | 0 | 0 | 2 | 0 | 0 | 2  | 942  | 0.002 |
| 335 | 2 | Abnormality of the thymus                                     | HP:0000777 | 0 | 0 | 0 | 0 | 1 | 0 | 0 | 1  | 44   | 0.023 |
| 336 | 3 | Thymus hyperplasia                                            | HP:0010516 | 0 | 0 | 0 | 0 | 1 | 0 | 0 | 1  | 2    | 0.500 |
| 337 | 2 | Abnormality of circulating hormone level                      | HP:0003117 | 0 | 0 | 0 | 0 | 1 | 0 | 0 | 1  | 293  | 0.003 |
| 338 | 3 | Abnormal serum insulin-like growth factor 1 level             | HP:0030352 | 0 | 0 | 0 | 0 | 1 | 0 | 0 | 1  | 9    | 0.111 |
| 339 | 4 | Decreased serum insulin-like growth factor 1                  | HP:0030353 | 0 | 0 | 0 | 0 | 1 | 0 | 0 | 1  | 6    | 0.167 |
| 340 | 2 | Abnormality of the adrenal glands                             | HP:0000834 | 0 | 0 | 0 | 0 | 1 | 0 | 0 | 1  | 172  | 0.006 |
| 341 | 3 | Abnormality of adrenal morphology                             | HP:0011732 | 0 | 0 | 0 | 0 | 1 | 0 | 0 | 1  | 71   | 0.014 |
| 342 | 4 | Adrenal hypoplasia                                            | HP:0000835 | 0 | 0 | 0 | 0 | 1 | 0 | 0 | 1  | 23   | 0.043 |
| 343 | 1 | Abnormality of the eye                                        | HP:0000478 | 2 | 0 | 1 | 3 | 6 | 3 | 2 | 17 | 2050 | 0.008 |
| 344 | 2 | Abnormal eye morphology                                       | HP:0012372 | 2 | 0 | 0 | 0 | 2 | 1 | 0 | 5  | 1646 | 0.003 |
| 345 | 3 | Abnormality of the globe                                      | HP:0012374 | 2 | 0 | 0 | 0 | 2 | 1 | 0 | 5  | 1644 | 0.003 |
| 346 | 4 | Abnormality of globe location                                 | HP:0100886 | 2 | 0 | 0 | 0 | 0 | 1 | 0 | 3  | 643  | 0.005 |
| 347 | 5 | Hypertelorism                                                 | HP:0000316 | 1 | 0 | 0 | 0 | 0 | 1 | 0 | 2  | 475  | 0.004 |
| 348 | 5 | Proptosis                                                     | HP:0000520 | 1 | 0 | 0 | 0 | 0 | 0 | 0 | 1  | 177  | 0.006 |
| 349 | 4 | Abnormality of the uvea                                       | HP:0000553 | 0 | 0 | 0 | 0 | 1 | 0 | 0 | 1  | 402  | 0.002 |
| 350 | 5 | Abnormality of the iris                                       | HP:0000525 | 0 | 0 | 0 | 0 | 1 | 0 | 0 | 1  | 323  | 0.003 |
| 351 | 6 | Abnormality of the pupil                                      | HP:0000615 | 0 | 0 | 0 | 0 | 1 | 0 | 0 | 1  | 41   | 0.024 |
| 352 | 7 | Abnormal pupillary function                                   | HP:0007686 | 0 | 0 | 0 | 0 | 1 | 0 | 0 | 1  | 19   | 0.053 |
| 353 | 8 | Miosis                                                        | HP:0000616 | 0 | 0 | 0 | 0 | 1 | 0 | 0 | 1  | 9    | 0.111 |
| 354 | 4 | Abnormality of the anterior segment of the globe              | HP:0004328 | 0 | 0 | 0 | 0 | 1 | 0 | 0 | 1  | 896  | 0.001 |
| 355 | 5 | Abnormality of the cornea                                     | HP:0000481 | 0 | 0 | 0 | 0 | 1 | 0 | 0 | 1  | 503  | 0.002 |
| 356 | 6 | Decreased corneal reflex                                      | HP:0008000 | 0 | 0 | 0 | 0 | 1 | 0 | 0 | 1  | 2    | 0.500 |
| 357 | 4 | Abnormality of the posterior segment of the globe             | HP:0004329 | 1 | 0 | 0 | 0 | 1 | 0 | 0 | 2  | 888  | 0.002 |
| 358 | 5 | Abnormality of the fundus                                     | HP:0001098 | 1 | 0 | 0 | 0 | 1 | 0 | 0 | 2  | 885  | 0.002 |
| 359 | 6 | Abnormality of the optic nerve                                | HP:0000587 | 0 | 0 | 0 | 0 | 1 | 0 | 0 | 1  | 560  | 0.002 |
| 360 | 7 | Abnormality of optic disc                                     | HP:0012795 | 0 | 0 | 0 | 0 | 1 | 0 | 0 | 1  | 464  | 0.002 |
| 361 | 8 | Optic atrophy                                                 | HP:0000648 | 0 | 0 | 0 | 0 | 1 | 0 | 0 | 1  | 415  | 0.002 |
| 362 | 6 | Abnormality of the retina                                     | HP:0000479 | 1 | 0 | 0 | 0 | 0 | 0 | 0 | 1  | 646  | 0.002 |
| 363 | 7 | Macular abnormality                                           | HP:0001103 | 1 | 0 | 0 | 0 | 0 | 0 | 0 | 1  | 145  | 0.007 |
| 364 | 2 | Abnormal eye physiology                                       | HP:0012373 | 1 | 0 | 1 | 3 | 5 | 2 | 2 | 14 | 1624 | 0.009 |
| 365 | 3 | Abnormality of vision                                         | HP:0000504 | 0 | 0 | 0 | 2 | 0 | 1 | 0 | 3  | 797  | 0.004 |
| 366 | 4 | Visual impairment                                             | HP:0000505 | 0 | 0 | 0 | 2 | 0 | 1 | 0 | 3  | 557  | 0.005 |

|     |   |                                              |            |   |   |   |   |   |   |   |    |      |       |
|-----|---|----------------------------------------------|------------|---|---|---|---|---|---|---|----|------|-------|
| 367 | 5 | Cortical visual impairment                   | HP:0100704 | 0 | 0 | 0 | 2 | 0 | 0 | 0 | 2  | 57   | 0.035 |
| 368 | 3 | Abnormality of refraction                    | HP:0000539 | 0 | 0 | 0 | 1 | 0 | 0 | 0 | 1  | 369  | 0.003 |
| 369 | 4 | Hypermetropia                                | HP:0000540 | 0 | 0 | 0 | 1 | 0 | 0 | 0 | 1  | 123  | 0.008 |
| 370 | 3 | Abnormality of eye movement                  | HP:0000496 | 1 | 0 | 1 | 2 | 4 | 1 | 2 | 11 | 1086 | 0.010 |
| 371 | 4 | Abnormal conjugate eye movement              | HP:0000549 | 1 | 0 | 0 | 2 | 4 | 1 | 2 | 10 | 627  | 0.016 |
| 372 | 5 | Strabismus                                   | HP:0000486 | 1 | 0 | 0 | 2 | 4 | 1 | 2 | 10 | 612  | 0.016 |
| 373 | 6 | Esotropia                                    | HP:0000565 | 1 | 0 | 0 | 0 | 0 | 1 | 2 | 4  | 59   | 0.068 |
| 374 | 4 | Abnormal involuntary eye movements           | HP:0012547 | 0 | 0 | 1 | 0 | 0 | 0 | 0 | 1  | 694  | 0.001 |
| 375 | 5 | Nystagmus                                    | HP:0000639 | 0 | 0 | 1 | 0 | 0 | 0 | 0 | 1  | 692  | 0.001 |
| 376 | 3 | Ptosis                                       | HP:0000508 | 0 | 0 | 0 | 0 | 1 | 0 | 0 | 1  | 441  | 0.002 |
| 377 | 4 | Bilateral ptosis                             | HP:0001488 | 0 | 0 | 0 | 0 | 1 | 0 | 0 | 1  | 13   | 0.077 |
| 378 | 3 | Abnormal visual electrophysiology            | HP:0030453 | 0 | 0 | 0 | 0 | 1 | 0 | 0 | 1  | 200  | 0.005 |
| 379 | 4 | Abnormal electroretinogram                   | HP:0000512 | 0 | 0 | 0 | 0 | 1 | 0 | 0 | 1  | 160  | 0.006 |
| 380 | 5 | Undetectable electroretinogram               | HP:0000550 | 0 | 0 | 0 | 0 | 1 | 0 | 0 | 1  | 20   | 0.050 |
| 381 | 1 | Abnormality of the genitourinary system      | HP:0000119 | 2 | 0 | 0 | 4 | 3 | 3 | 1 | 13 | 1672 | 0.008 |
| 382 | 2 | Abnormality of the genital system            | HP:0000078 | 2 | 0 | 0 | 1 | 0 | 0 | 0 | 3  | 1059 | 0.003 |
| 383 | 3 | Abnormal genital system morphology           | HP:0012243 | 2 | 0 | 0 | 1 | 0 | 0 | 0 | 3  | 962  | 0.003 |
| 384 | 4 | Abnormal external genitalia                  | HP:0000811 | 2 | 0 | 0 | 1 | 0 | 0 | 0 | 3  | 792  | 0.004 |
| 385 | 5 | Abnormality of male external genitalia       | HP:0000032 | 2 | 0 | 0 | 1 | 0 | 0 | 0 | 3  | 769  | 0.004 |
| 386 | 6 | Abnormality of the testis                    | HP:0000035 | 2 | 0 | 0 | 1 | 0 | 0 | 0 | 3  | 677  | 0.004 |
| 387 | 7 | Cryptorchidism                               | HP:0000028 | 2 | 0 | 0 | 1 | 0 | 0 | 0 | 3  | 515  | 0.006 |
| 388 | 8 | Unilateral cryptorchidism                    | HP:0012741 | 1 | 0 | 0 | 0 | 0 | 0 | 0 | 1  | 5    | 0.200 |
| 389 | 6 | Abnormality of the penis                     | HP:0000036 | 1 | 0 | 0 | 1 | 0 | 0 | 0 | 2  | 507  | 0.004 |
| 390 | 7 | Displacement of the external urethral meatus | HP:0100627 | 1 | 0 | 0 | 0 | 0 | 0 | 0 | 1  | 243  | 0.004 |
| 391 | 8 | Hypospadias                                  | HP:0000047 | 1 | 0 | 0 | 0 | 0 | 0 | 0 | 1  | 229  | 0.004 |
| 392 | 7 | Hypoplasia of penis                          | HP:0008736 | 0 | 0 | 0 | 1 | 0 | 0 | 0 | 1  | 327  | 0.003 |
| 393 | 8 | Micropenis                                   | HP:0000054 | 0 | 0 | 0 | 1 | 0 | 0 | 0 | 1  | 160  | 0.006 |
| 394 | 2 | Abnormality of the urinary system            | HP:0000079 | 2 | 0 | 0 | 4 | 3 | 3 | 1 | 13 | 1229 | 0.011 |
| 395 | 3 | Abnormality of the urinary system physiology | HP:0011277 | 0 | 0 | 0 | 0 | 0 | 1 | 0 | 1  | 700  | 0.001 |
| 396 | 4 | Abnormality of urine homeostasis             | HP:0003110 | 0 | 0 | 0 | 0 | 0 | 1 | 0 | 1  | 438  | 0.002 |
| 397 | 5 | Proteinuria                                  | HP:0000093 | 0 | 0 | 0 | 0 | 0 | 1 | 0 | 1  | 141  | 0.007 |
| 398 | 6 | Mild proteinuria                             | HP:0012595 | 0 | 0 | 0 | 0 | 0 | 1 | 0 | 1  | 0    | 0.000 |
| 399 | 3 | Abnormality of the upper urinary tract       | HP:0010935 | 2 | 0 | 0 | 0 | 3 | 1 | 0 | 6  | 886  | 0.007 |
| 400 | 4 | Abnormality of the kidney                    | HP:0000077 | 2 | 0 | 0 | 0 | 3 | 1 | 0 | 6  | 863  | 0.007 |
| 401 | 5 | Abnormal renal morphology                    | HP:0012210 | 1 | 0 | 0 | 0 | 3 | 1 | 0 | 5  | 670  | 0.007 |
| 402 | 6 | Hyperechogenic kidneys                       | HP:0004719 | 0 | 0 | 0 | 0 | 1 | 0 | 0 | 1  | 5    | 0.200 |
| 403 | 6 | Abnormality of the nephron                   | HP:0012575 | 0 | 0 | 0 | 0 | 1 | 0 | 0 | 1  | 166  | 0.006 |
| 404 | 7 | Abnormality of the renal tubule              | HP:0000091 | 0 | 0 | 0 | 0 | 1 | 0 | 0 | 1  | 76   | 0.013 |
| 405 | 6 | Abnormality of the renal pelvis              | HP:0010944 | 1 | 0 | 0 | 0 | 0 | 1 | 0 | 2  | 142  | 0.014 |
| 406 | 7 | Dilatation of the renal pelvis               | HP:0010946 | 1 | 0 | 0 | 0 | 0 | 1 | 0 | 2  | 141  | 0.014 |
| 407 | 8 | Hydronephrosis                               | HP:0000126 | 1 | 0 | 0 | 0 | 0 | 1 | 0 | 2  | 141  | 0.014 |

|     |   |                                         |            |   |   |   |   |   |   |   |    |      |       |
|-----|---|-----------------------------------------|------------|---|---|---|---|---|---|---|----|------|-------|
| 408 | 6 | Renal hypoplasia/aplasia                | HP:0008678 | 0 | 0 | 0 | 0 | 1 | 0 | 0 | 1  | 201  | 0.005 |
| 409 | 7 | Renal agenesis                          | HP:0000104 | 0 | 0 | 0 | 0 | 1 | 0 | 0 | 1  | 96   | 0.010 |
| 410 | 8 | Unilateral kidney agenesis              | HP:0000122 | 0 | 0 | 0 | 0 | 1 | 0 | 0 | 1  | 32   | 0.031 |
| 411 | 5 | Abnormal renal physiology               | HP:0012211 | 1 | 0 | 0 | 0 | 0 | 0 | 0 | 1  | 454  | 0.002 |
| 412 | 6 | Hemolytic uremic syndrome               | HP:0005575 | 1 | 0 | 0 | 0 | 0 | 0 | 0 | 1  | 3    | 0.333 |
| 413 | 6 | Renal insufficiency                     | HP:0000083 | 1 | 0 | 0 | 0 | 0 | 0 | 0 | 1  | 282  | 0.004 |
| 414 | 3 | Abnormality of the lower urinary tract  | HP:0010936 | 0 | 0 | 0 | 4 | 1 | 1 | 1 | 7  | 456  | 0.015 |
| 415 | 4 | Abnormality of the bladder              | HP:0000014 | 0 | 0 | 0 | 4 | 1 | 1 | 1 | 7  | 234  | 0.030 |
| 416 | 5 | Funcitonal abnormality of the bladder   | HP:0000009 | 0 | 0 | 0 | 4 | 1 | 1 | 1 | 7  | 210  | 0.033 |
| 417 | 6 | Neurogenic bladder                      | HP:0000011 | 0 | 0 | 0 | 2 | 0 | 1 | 0 | 3  | 9    | 0.333 |
| 418 | 6 | Urinary incontinence                    | HP:0000020 | 0 | 0 | 0 | 2 | 0 | 0 | 1 | 3  | 57   | 0.053 |
| 419 | 1 | Abnormality of the immune system        | HP:0002715 | 1 | 0 | 2 | 1 | 8 | 2 | 0 | 14 | 1251 | 0.011 |
| 420 | 2 | Abnormality of the lymphatic system     | HP:0100763 | 0 | 0 | 0 | 0 | 1 | 0 | 0 | 1  | 459  | 0.002 |
| 421 | 3 | Abnormality of the lymph nodes          | HP:0002733 | 0 | 0 | 0 | 0 | 1 | 0 | 0 | 1  | 145  | 0.007 |
| 422 | 4 | Lymphadenopathy                         | HP:0002716 | 0 | 0 | 0 | 0 | 1 | 0 | 0 | 1  | 137  | 0.007 |
| 423 | 5 | Generalized lymphadenopathy             | HP:0008940 | 0 | 0 | 0 | 0 | 1 | 0 | 0 | 1  | 1    | 1.000 |
| 424 | 2 | Abnormality of immune system physiology | HP:0010978 | 1 | 0 | 2 | 1 | 7 | 2 | 0 | 13 | 950  | 0.014 |
| 425 | 3 | Recurrent infections                    | HP:0002719 | 1 | 0 | 2 | 1 | 7 | 2 | 0 | 13 | 528  | 0.025 |
| 426 | 4 | Recurrent respiratory infections        | HP:0002205 | 0 | 0 | 1 | 0 | 1 | 0 | 0 | 2  | 339  | 0.006 |
| 427 | 4 | Recurrent urinary tract infections      | HP:0000010 | 0 | 0 | 0 | 1 | 0 | 0 | 0 | 1  | 83   | 0.012 |
| 428 | 3 | Abnormality of humoral immunity         | HP:0005368 | 1 | 0 | 0 | 0 | 3 | 0 | 0 | 4  | 163  | 0.025 |
| 429 | 4 | Abnormality of complement system        | HP:0005339 | 1 | 0 | 0 | 0 | 0 | 0 | 0 | 1  | 23   | 0.043 |
| 430 | 4 | Abnormal immunoglobulin level           | HP:0010701 | 0 | 0 | 0 | 0 | 3 | 0 | 0 | 3  | 140  | 0.021 |
| 431 | 5 | Hypogammaglobulinemia                   | HP:0004313 | 0 | 0 | 0 | 0 | 2 | 0 | 0 | 2  | 97   | 0.021 |
| 432 | 5 | Hypergammaglobulinemia                  | HP:0010702 | 0 | 0 | 0 | 0 | 1 | 0 | 0 | 1  | 49   | 0.020 |
| 433 | 3 | Immunodeficiency                        | HP:0002721 | 0 | 0 | 0 | 0 | 2 | 0 | 0 | 2  | 180  | 0.011 |
| 434 | 4 | Combined immunodeficiency               | HP:0005387 | 0 | 0 | 0 | 0 | 2 | 0 | 0 | 2  | 18   | 0.111 |
| 435 | 1 | Abnormality of the integument           | HP:0001574 | 0 | 0 | 1 | 1 | 9 | 5 | 1 | 17 | 1777 | 0.010 |
| 436 | 2 | Abnormality of the skin                 | HP:0000951 | 0 | 0 | 0 | 1 | 4 | 5 | 1 | 11 | 1454 | 0.008 |
| 437 | 3 | Abnormality of skin morphology          | HP:0007517 | 0 | 0 | 0 | 1 | 4 | 5 | 1 | 11 | 1356 | 0.008 |
| 439 | 4 | Abnormal elasticity of skin             | HP:0010647 | 0 | 0 | 0 | 1 | 0 | 5 | 0 | 6  | 144  | 0.042 |
| 440 | 5 | Abnormally lax or hyperextensible skin  | HP:0008067 | 0 | 0 | 0 | 1 | 0 | 5 | 0 | 6  | 109  | 0.055 |
| 441 | 6 | Cutis laxa                              | HP:0000973 | 0 | 0 | 0 | 1 | 0 | 2 | 0 | 3  | 73   | 0.041 |
| 438 | 6 | Excessive wrinkled skin                 | HP:0100678 | 0 | 0 | 0 | 1 | 0 | 5 | 0 | 6  | 35   | 0.171 |
| 442 | 4 | Thickened skin                          | HP:0001072 | 0 | 0 | 0 | 0 | 3 | 0 | 1 | 4  | 359  | 0.011 |
| 443 | 5 | Epidermal thickening                    | HP:0011368 | 0 | 0 | 0 | 0 | 3 | 0 | 1 | 4  | 326  | 0.012 |
| 444 | 6 | Hyperkeratosis                          | HP:0000962 | 0 | 0 | 0 | 0 | 3 | 0 | 1 | 4  | 215  | 0.019 |
| 445 | 6 | Hyperkeratosis pilaris                  | HP:0040180 | 0 | 0 | 0 | 0 | 0 | 0 | 1 | 1  | 3    | 0.333 |
| 446 | 4 | Dry skin                                | HP:0000958 | 0 | 0 | 0 | 1 | 2 | 0 | 1 | 4  | 114  | 0.035 |
| 447 | 4 | Abnormality of epidermal morphology     | HP:0011124 | 0 | 0 | 0 | 1 | 0 | 0 | 0 | 1  | 50   | 0.020 |
| 448 | 5 | Scaling skin                            | HP:0040189 | 0 | 0 | 0 | 1 | 0 | 0 | 0 | 1  | 14   | 0.071 |

|     |   |                                              |            |   |   |   |    |    |   |   |           |             |              |
|-----|---|----------------------------------------------|------------|---|---|---|----|----|---|---|-----------|-------------|--------------|
| 449 | 2 | Abnormality of the skin adnexa               | HP:0011138 | 0 | 0 | 1 | 0  | 6  | 1 | 0 | <b>8</b>  | <b>945</b>  | <b>0.008</b> |
| 450 | 3 | Abnormality of the hair                      | HP:0001595 | 0 | 0 | 1 | 0  | 1  | 1 | 0 | <b>3</b>  | <b>827</b>  | <b>0.004</b> |
| 451 | 4 | Abnormality of hair density                  | HP:0011357 | 0 | 0 | 1 | 0  | 0  | 0 | 0 | <b>1</b>  | <b>244</b>  | <b>0.004</b> |
| 452 | 5 | Thick hair                                   | HP:0100874 | 0 | 0 | 1 | 0  | 0  | 0 | 0 | <b>1</b>  | <b>10</b>   | <b>0.100</b> |
| 453 | 4 | Abnormal hair quantity                       | HP:0011362 | 0 | 0 | 0 | 0  | 0  | 1 | 0 | <b>1</b>  | <b>431</b>  | <b>0.002</b> |
| 454 | 5 | Hypertrichosis                               | HP:0000998 | 0 | 0 | 0 | 0  | 0  | 1 | 0 | <b>1</b>  | <b>122</b>  | <b>0.008</b> |
| 455 | 4 | Abnormality of hair pigmentation             | HP:0009887 | 0 | 0 | 0 | 0  | 1  | 0 | 0 | <b>1</b>  | <b>95</b>   | <b>0.011</b> |
| 456 | 5 | Hypopigmentation of hair                     | HP:0005599 | 0 | 0 | 0 | 0  | 1  | 0 | 0 | <b>1</b>  | <b>84</b>   | <b>0.012</b> |
| 457 | 3 | Abnormality of the sweat gland               | HP:0000971 | 0 | 0 | 0 | 0  | 7  | 0 | 0 | <b>7</b>  | <b>8</b>    | <b>0.875</b> |
| 458 | 4 | Hypohidrosis or hyperhidrosis                | HP:0007550 | 0 | 0 | 0 | 0  | 7  | 0 | 0 | <b>7</b>  | <b>159</b>  | <b>0.044</b> |
| 459 | 5 | Hypohidrosis                                 | HP:0000966 | 0 | 0 | 0 | 0  | 11 | 0 | 0 | <b>11</b> | <b>58</b>   | <b>0.190</b> |
| 460 | 1 | Abnormality of the musculature               | HP:0003011 | 1 | 1 | 2 | 7  | 11 | 8 | 3 | <b>33</b> | <b>1928</b> | <b>0.017</b> |
| 461 | 2 | Abnormality of muscle morphology             | HP:0011805 | 0 | 0 | 0 | 1  | 0  | 2 | 1 | <b>4</b>  | <b>1024</b> | <b>0.004</b> |
| 462 | 3 | Decreased muscle mass                        | HP:0003199 | 0 | 0 | 0 | 1  | 0  | 2 | 1 | <b>4</b>  | <b>51</b>   | <b>0.078</b> |
| 463 | 2 | Abnormality of muscle physiology             | HP:0011804 | 1 | 1 | 2 | 7  | 11 | 8 | 3 | <b>33</b> | <b>1633</b> | <b>0.020</b> |
| 464 | 3 | Abnormal muscle tone                         | HP:0003808 | 1 | 1 | 2 | 7  | 11 | 8 | 3 | <b>33</b> | <b>1368</b> | <b>0.024</b> |
| 465 | 4 | Muscular hypotonia                           | HP:0001252 | 1 | 0 | 2 | 7  | 11 | 7 | 3 | <b>31</b> | <b>1123</b> | <b>0.028</b> |
| 466 | 5 | Generalized hypotonia                        | HP:0001290 | 1 | 0 | 1 | 1  | 1  | 2 | 0 | <b>6</b>  | <b>660</b>  | <b>0.009</b> |
| 467 | 5 | Axial hypotonia                              | HP:0008936 | 0 | 0 | 1 | 0  | 2  | 0 | 0 | <b>3</b>  | <b>91</b>   | <b>0.033</b> |
| 468 | 4 | Hypertonia                                   | HP:0001276 | 0 | 1 | 1 | 1  | 0  | 1 | 0 | <b>4</b>  | <b>607</b>  | <b>0.007</b> |
| 469 | 5 | Limb hypertonia                              | HP:0002509 | 0 | 0 | 1 | 1  | 0  | 0 | 0 | <b>2</b>  | <b>19</b>   | <b>0.105</b> |
| 470 | 5 | Spasticity                                   | HP:0001257 | 0 | 1 | 0 | 1  | 0  | 1 | 0 | <b>3</b>  | <b>490</b>  | <b>0.006</b> |
| 471 | 6 | Spastic tetraplegia                          | HP:0002510 | 0 | 1 | 0 | 1  | 0  | 0 | 0 | <b>2</b>  | <b>55</b>   | <b>0.036</b> |
| 472 | 6 | Opisthotonus                                 | HP:0002179 | 0 | 0 | 0 | 0  | 0  | 1 | 0 | <b>1</b>  | <b>25</b>   | <b>0.040</b> |
| 473 | 1 | Abnormality of the nervous system            | HP:0000707 | 3 | 1 | 2 | 10 | 18 | 8 | 3 | <b>45</b> | <b>2863</b> | <b>0.016</b> |
| 474 | 2 | Abnormality of the nervous system morphology | HP:0012639 | 3 | 1 | 2 | 10 | 16 | 7 | 3 | <b>42</b> | <b>2033</b> | <b>0.021</b> |
| 475 | 3 | Morphological abnormality of the CNS         | HP:0002011 | 3 | 1 | 2 | 10 | 16 | 7 | 3 | <b>42</b> | <b>1872</b> | <b>0.022</b> |
| 476 | 4 | Abnormality of brain morphology              | HP:0012443 | 3 | 1 | 2 | 10 | 16 | 7 | 3 | <b>42</b> | <b>1724</b> | <b>0.024</b> |
| 477 | 5 | Abnormality of the forebrain morphology      | HP:0100547 | 3 | 1 | 2 | 7  | 16 | 7 | 2 | <b>38</b> | <b>1198</b> | <b>0.032</b> |
| 478 | 6 | Abnormality of the cerebrum                  | HP:0002060 | 3 | 1 | 2 | 7  | 16 | 7 | 2 | <b>38</b> | <b>1177</b> | <b>0.032</b> |
| 479 | 7 | Aplasia/hypoplasia of the cerebrum           | HP:0007364 | 3 | 1 | 2 | 7  | 16 | 7 | 2 | <b>38</b> | <b>897</b>  | <b>0.042</b> |
| 480 | 8 | Microcephaly                                 | HP:0000252 | 3 | 1 | 1 | 7  | 15 | 6 | 1 | <b>34</b> | <b>736</b>  | <b>0.046</b> |
| 481 | 9 | Progressive microcephaly                     | HP:0000253 | 1 | 0 | 0 | 2  | 6  | 5 | 0 | <b>14</b> | <b>53</b>   | <b>0.264</b> |
| 482 | 9 | Postnatal microcephaly                       | HP:0005484 | 0 | 1 | 0 | 0  | 0  | 0 | 0 | <b>1</b>  | <b>51</b>   | <b>0.020</b> |
| 483 | 8 | Atrophy/degeneration affecting cerebrum      | HP:0007369 | 2 | 1 | 2 | 1  | 4  | 2 | 1 | <b>13</b> | <b>355</b>  | <b>0.037</b> |
| 484 | 9 | Cerebral atrophy                             | HP:0002059 | 2 | 1 | 2 | 1  | 4  | 2 | 1 | <b>13</b> | <b>348</b>  | <b>0.037</b> |
| 485 | 8 | Aplasia/hypoplasia of the corpus callosum    | HP:0007370 | 0 | 1 | 1 | 0  | 6  | 3 | 0 | <b>11</b> | <b>400</b>  | <b>0.028</b> |
| 486 | 9 | Hypoplasia of the corpus callosum            | HP:0002079 | 0 | 1 | 1 | 0  | 5  | 3 | 0 | <b>10</b> | <b>206</b>  | <b>0.049</b> |
| 487 | 9 | Agenesis of the corpus callosum              | HP:0001274 | 0 | 0 | 0 | 0  | 1  | 0 | 0 | <b>1</b>  | <b>187</b>  | <b>0.005</b> |
| 488 | 7 | Abnormality of the cerebral subcortex        | HP:0010993 | 0 | 0 | 0 | 1  | 2  | 2 | 0 | <b>5</b>  | <b>510</b>  | <b>0.010</b> |
| 489 | 8 | Abnormality of the cerebral white matter     | HP:0002500 | 0 | 0 | 0 | 1  | 2  | 2 | 0 | <b>5</b>  | <b>474</b>  | <b>0.011</b> |

|     |    |                                                 |            |   |   |   |    |    |   |   |    |      |       |
|-----|----|-------------------------------------------------|------------|---|---|---|----|----|---|---|----|------|-------|
| 490 | 9  | Cerebral white matter atrophy                   | HP:0012762 | 0 | 0 | 0 | 1  | 2  | 2 | 0 | 5  | 9    | 0.556 |
| 491 | 10 | Abnormality of the periventricular white matter | HP:0002518 | 0 | 0 | 0 | 0  | 2  | 0 | 0 | 2  | 37   | 0.054 |
| 492 | 11 | Periventricular leukomalacia                    | HP:0006970 | 0 | 0 | 0 | 0  | 2  | 0 | 0 | 2  | 8    | 0.250 |
| 493 | 5  | Abnormality of the hindbrain morphology         | HP:0011282 | 3 | 0 | 1 | 5  | 3  | 2 | 2 | 16 | 886  | 0.018 |
| 494 | 6  | Abnormality of the metencephalon                | HP:0011283 | 3 | 0 | 1 | 5  | 3  | 2 | 2 | 16 | 886  | 0.018 |
| 495 | 7  | Abnormality of the cerebellum                   | HP:0001317 | 3 | 0 | 1 | 5  | 3  | 2 | 2 | 16 | 884  | 0.018 |
| 496 | 8  | Cerebellar atrophy                              | HP:0001272 | 2 | 0 | 0 | 5  | 1  | 2 | 2 | 12 | 202  | 0.059 |
| 497 | 9  | Diffuse cerebellar atrophy                      | HP:0100275 | 0 | 0 | 0 | 3  | 0  | 0 | 1 | 4  | 3    | 1.333 |
| 498 | 8  | Ataxia                                          | HP:0001251 | 0 | 0 | 1 | 4  | 0  | 0 | 1 | 6  | 602  | 0.010 |
| 499 | 9  | Dysmetria                                       | HP:0001310 | 0 | 0 | 0 | 3  | 0  | 0 | 1 | 4  | 85   | 0.047 |
| 500 | 9  | Dysdiadochokinesis                              | HP:0002075 | 0 | 0 | 0 | 3  | 0  | 0 | 0 | 3  | 30   | 0.100 |
| 501 | 9  | Truncal ataxia                                  | HP:0002078 | 0 | 0 | 0 | 1  | 0  | 0 | 0 | 1  | 30   | 0.033 |
| 502 | 9  | Gait ataxia                                     | HP:0002066 | 0 | 0 | 0 | 3  | 0  | 0 | 0 | 3  | 78   | 0.038 |
| 503 | 10 | Progressive gait ataxia                         | HP:0007240 | 0 | 0 | 0 | 3  | 0  | 0 | 0 | 3  | 5    | 0.600 |
| 504 | 8  | Aplasia/hypoplasia of the cerebellum            | HP:0007360 | 0 | 0 | 0 | 0  | 2  | 0 | 0 | 2  | 235  | 0.009 |
| 505 | 9  | Cerebellar hypoplasia                           | HP:0001321 | 0 | 0 | 0 | 0  | 2  | 0 | 0 | 2  | 146  | 0.014 |
| 506 | 8  | Cerebellar malformation                         | HP:0002438 | 1 | 0 | 0 | 0  | 0  | 0 | 0 | 1  | 219  | 0.005 |
| 507 | 9  | Abnormality of the cerebellar vermis            | HP:0002334 | 1 | 0 | 0 | 0  | 0  | 0 | 0 | 1  | 178  | 0.006 |
| 508 | 10 | Aplasia/hypoplasia of the cereb. vermis         | HP:0006817 | 1 | 0 | 0 | 0  | 0  | 0 | 0 | 1  | 163  | 0.006 |
| 509 | 11 | Hypoplastic cerebellar vermis                   | HP:0001320 | 1 | 0 | 0 | 0  | 0  | 0 | 0 | 1  | 141  | 0.007 |
| 510 | 5  | Abnormality of brain stem morphology            | HP:0002363 | 0 | 0 | 0 | 1  | 0  | 0 | 1 | 2  | 82   | 0.024 |
| 511 | 6  | Atrophy/degeneration affecting the brain stem   | HP:0007366 | 0 | 0 | 0 | 1  | 0  | 0 | 1 | 2  | 11   | 0.182 |
| 512 | 5  | Abnormality of the cerebral ventricles          | HP:0002118 | 2 | 0 | 0 | 1  | 2  | 4 | 1 | 10 | 516  | 0.019 |
| 513 | 6  | Ventriculomegaly                                | HP:0002119 | 2 | 0 | 0 | 1  | 2  | 4 | 1 | 10 | 381  | 0.026 |
| 514 | 5  | Abnormality of the pituitary gland              | HP:0012503 | 0 | 1 | 0 | 0  | 1  | 0 | 0 | 2  | 212  | 0.009 |
| 515 | 6  | Abnormal size of pituitary gland                | HP:0012504 | 0 | 1 | 0 | 0  | 0  | 0 | 0 | 1  | 6    | 0.167 |
| 516 | 7  | Small pituitary gland                           | HP:0012506 | 0 | 1 | 0 | 0  | 0  | 0 | 0 | 1  | 2    | 0.500 |
| 517 | 6  | Abnormality of the anterior pituitary           | HP:0011747 | 0 | 0 | 0 | 0  | 1  | 0 | 0 | 1  | 194  | 0.005 |
| 518 | 7  | Hyperpituitarism                                | HP:0010514 | 0 | 0 | 0 | 0  | 1  | 0 | 0 | 1  | 68   | 0.015 |
| 519 | 8  | Thyroid-stimulating hormone excess              | HP:0002925 | 0 | 0 | 0 | 0  | 1  | 0 | 0 | 1  | 11   | 0.091 |
| 520 | 4  | Abnormal CNS myelination                        | HP:0011400 | 0 | 0 | 0 | 1  | 2  | 1 | 0 | 4  | 131  | 0.031 |
| 521 | 5  | Delayed CNS myelination                         | HP:0002188 | 0 | 0 | 0 | 1  | 2  | 1 | 0 | 4  | 15   | 0.267 |
| 522 | 3  | Abnormal peripheral nervous system morphology   | HP:0000759 | 0 | 0 | 0 | 1  | 0  | 1 | 2 | 4  | 635  | 0.006 |
| 523 | 4  | Peripheral neuropathy                           | HP:0009830 | 0 | 0 | 0 | 1  | 0  | 1 | 2 | 4  | 420  | 0.010 |
| 524 | 2  | Abnormality of nervous system physiology        | HP:0012638 | 3 | 1 | 2 | 10 | 17 | 7 | 3 | 43 | 2474 | 0.017 |
| 525 | 3  | Abnormality of higher mental function           | HP:0011446 | 0 | 0 | 0 | 3  | 1  | 0 | 0 | 4  | 1024 | 0.004 |
| 526 | 4  | Reduced consciousness                           | HP:0004372 | 0 | 0 | 0 | 0  | 1  | 0 | 0 | 1  | 234  | 0.004 |
| 527 | 5  | Lethargy                                        | HP:0001254 | 0 | 0 | 0 | 0  | 1  | 0 | 0 | 1  | 103  | 0.010 |
| 528 | 4  | Neurological speech impairment                  | HP:0002167 | 0 | 0 | 0 | 3  | 1  | 0 | 0 | 4  | 635  | 0.006 |
| 529 | 5  | Dysarthria                                      | HP:0001260 | 0 | 0 | 0 | 3  | 0  | 0 | 0 | 3  | 359  | 0.008 |
| 530 | 3  | Neurodevelopmental abnormality                  | HP:0012759 | 3 | 1 | 2 | 10 | 16 | 4 | 2 | 38 | 1801 | 0.021 |

|     |   |                                                         |            |   |   |   |    |    |   |   |           |             |              |
|-----|---|---------------------------------------------------------|------------|---|---|---|----|----|---|---|-----------|-------------|--------------|
| 531 | 4 | Intellectual disability                                 | HP:0001249 | 2 | 1 | 0 | 10 | 9  | 0 | 2 | <b>24</b> | <b>1290</b> | <b>0.019</b> |
| 532 | 5 | Mild intellectual disability                            | HP:0001256 | 0 | 0 | 0 | 3  | 0  | 0 | 0 | <b>3</b>  | <b>137</b>  | <b>0.022</b> |
| 533 | 5 | Moderate intellectual disability                        | HP:0002342 | 2 | 0 | 0 | 3  | 0  | 0 | 0 | <b>5</b>  | <b>50</b>   | <b>0.100</b> |
| 534 | 5 | Severe intellectual disability                          | HP:0010864 | 0 | 0 | 0 | 4  | 0  | 0 | 0 | <b>4</b>  | <b>159</b>  | <b>0.025</b> |
| 535 | 4 | Neurodevelopmental delay                                | HP:0012758 | 3 | 1 | 2 | 6  | 16 | 4 | 1 | <b>33</b> | <b>1310</b> | <b>0.025</b> |
| 536 | 5 | Global developmental delay                              | HP:0001263 | 3 | 1 | 2 | 6  | 16 | 4 | 1 | <b>33</b> | <b>1123</b> | <b>0.029</b> |
| 537 | 6 | Mild global developmental delay                         | HP:0011342 | 2 | 0 | 0 | 2  | 2  | 0 | 0 | <b>6</b>  | <b>22</b>   | <b>0.273</b> |
| 538 | 6 | Moderate global developmental delay                     | HP:0011343 | 1 | 0 | 1 | 0  | 0  | 0 | 0 | <b>2</b>  | <b>7</b>    | <b>0.286</b> |
| 539 | 6 | Severe global developmental delay                       | HP:0011344 | 0 | 0 | 0 | 1  | 1  | 0 | 0 | <b>2</b>  | <b>66</b>   | <b>0.030</b> |
| 540 | 6 | Profound global developmental delay                     | HP:0012736 | 0 | 0 | 0 | 1  | 0  | 2 | 0 | <b>3</b>  | <b>24</b>   | <b>0.125</b> |
| 541 | 5 | Delayed speech and language development                 | HP:0000750 | 0 | 0 | 1 | 4  | 0  | 0 | 1 | <b>6</b>  | <b>291</b>  | <b>0.021</b> |
| 542 | 6 | Absent speech                                           | HP:0001344 | 0 | 0 | 1 | 4  | 0  | 0 | 1 | <b>6</b>  | <b>77</b>   | <b>0.078</b> |
| 543 | 4 | Developmental regression                                | HP:0002376 | 0 | 0 | 1 | 0  | 0  | 0 | 1 | <b>2</b>  | <b>197</b>  | <b>0.010</b> |
| 544 | 3 | Seizures                                                | HP:0001250 | 0 | 1 | 2 | 1  | 4  | 5 | 2 | <b>15</b> | <b>1174</b> | <b>0.013</b> |
| 545 | 4 | Generalized seizures                                    | HP:0002197 | 0 | 1 | 0 | 1  | 0  | 0 | 0 | <b>2</b>  | <b>136</b>  | <b>0.015</b> |
| 546 | 5 | Generalized tonic seizures                              | HP:0010818 | 0 | 1 | 0 | 0  | 0  | 0 | 0 | <b>1</b>  | <b>10</b>   | <b>0.100</b> |
| 547 | 4 | Focal seizures                                          | HP:0007359 | 0 | 0 | 0 | 0  | 1  | 0 | 0 | <b>1</b>  | <b>50</b>   | <b>0.020</b> |
| 548 | 3 | Abnormal nervous system electrophysiology               | HP:0001311 | 0 | 0 | 0 | 0  | 0  | 3 | 0 | <b>3</b>  | <b>334</b>  | <b>0.009</b> |
| 549 | 4 | Abnormality of central nervous system electrophysiology | HP:0030178 | 0 | 0 | 0 | 0  | 0  | 3 | 0 | <b>3</b>  | <b>257</b>  | <b>0.012</b> |
| 550 | 5 | EEG abnormality                                         | HP:0002353 | 0 | 0 | 0 | 0  | 0  | 3 | 0 | <b>3</b>  | <b>246</b>  | <b>0.012</b> |
| 551 | 3 | Reduced tendon reflexes                                 | HP:0001315 | 0 | 0 | 0 | 4  | 1  | 5 | 2 | <b>12</b> | <b>347</b>  | <b>0.035</b> |
| 552 | 4 | Areflexia                                               | HP:0001284 | 0 | 0 | 0 | 0  | 1  | 2 | 0 | <b>3</b>  | <b>160</b>  | <b>0.019</b> |
| 553 | 4 | Hyporeflexia                                            | HP:0001265 | 0 | 0 | 0 | 4  | 0  | 2 | 2 | <b>8</b>  | <b>226</b>  | <b>0.035</b> |
| 554 | 5 | Hyporeflexia of lower limbs                             | HP:0002600 | 0 | 0 | 0 | 1  | 0  | 0 | 0 | <b>1</b>  | <b>16</b>   | <b>0.063</b> |
| 555 | 3 | Abnormality of central motor function                   | HP:0011442 | 0 | 0 | 1 | 2  | 0  | 0 | 0 | <b>3</b>  | <b>1294</b> | <b>0.002</b> |
| 556 | 4 | Upper motor neuron dysfunction                          | HP:0002493 | 0 | 0 | 1 | 1  | 0  | 0 | 0 | <b>2</b>  | <b>944</b>  | <b>0.002</b> |
| 557 | 5 | Hyperreflexia                                           | HP:0001347 | 0 | 0 | 1 | 1  | 0  | 0 | 0 | <b>2</b>  | <b>502</b>  | <b>0.004</b> |
| 558 | 4 | Abnormality of coordination                             | HP:0011443 | 0 | 0 | 0 | 1  | 0  | 0 | 0 | <b>1</b>  | <b>657</b>  | <b>0.002</b> |
| 559 | 5 | Slurred speech                                          | HP:0001350 | 0 | 0 | 0 | 1  | 0  | 0 | 0 | <b>1</b>  | <b>25</b>   | <b>0.040</b> |
| 560 | 6 | Slow slurred speech                                     | HP:0007164 | 0 | 0 | 0 | 1  | 0  | 0 | 0 | <b>1</b>  | <b>2</b>    | <b>0.500</b> |
| 561 | 3 | Abnormality of movement                                 | HP:0100022 | 0 | 0 | 1 | 2  | 1  | 0 | 1 | <b>5</b>  | <b>1069</b> | <b>0.005</b> |
| 562 | 4 | Involuntary movements                                   | HP:0004305 | 0 | 0 | 1 | 0  | 0  | 0 | 1 | <b>2</b>  | <b>558</b>  | <b>0.004</b> |
| 563 | 5 | Myoclonus                                               | HP:0001336 | 0 | 0 | 0 | 0  | 0  | 0 | 1 | <b>1</b>  | <b>143</b>  | <b>0.007</b> |
| 564 | 4 | Gait disturbance                                        | HP:0001288 | 0 | 0 | 0 | 2  | 1  | 0 | 0 | <b>3</b>  | <b>536</b>  | <b>0.006</b> |
| 565 | 5 | Broad-based gait                                        | HP:0002136 | 0 | 0 | 0 | 1  | 0  | 0 | 0 | <b>1</b>  | <b>33</b>   | <b>0.030</b> |
| 566 | 5 | Inability to walk                                       | HP:0002540 | 0 | 0 | 0 | 1  | 1  | 0 | 0 | <b>2</b>  | <b>53</b>   | <b>0.038</b> |
| 567 | 3 | Behavioral abnormality                                  | HP:0000708 | 0 | 0 | 0 | 3  | 2  | 1 | 0 | <b>6</b>  | <b>965</b>  | <b>0.006</b> |
| 568 | 4 | Short attention span                                    | HP:0000736 | 0 | 0 | 0 | 1  | 0  | 0 | 0 | <b>1</b>  | <b>144</b>  | <b>0.007</b> |
| 569 | 5 | Attention deficit hyperactive disorder                  | HP:0007018 | 0 | 0 | 0 | 1  | 0  | 0 | 0 | <b>1</b>  | <b>146</b>  | <b>0.007</b> |
| 570 | 4 | Abnormal emotion/affect behavior                        | HP:0100851 | 0 | 0 | 0 | 0  | 1  | 1 | 0 | <b>2</b>  | <b>246</b>  | <b>0.008</b> |
| 571 | 5 | Irritability                                            | HP:0000737 | 0 | 0 | 0 | 0  | 0  | 1 | 0 | <b>1</b>  | <b>104</b>  | <b>0.010</b> |



|     |   |                                                  |            |   |   |   |   |    |   |   |    |      |       |
|-----|---|--------------------------------------------------|------------|---|---|---|---|----|---|---|----|------|-------|
| 572 | 5 | Abnormal aggressive, impulsive or violent behav. | HP:0006919 | 0 | 0 | 0 | 0 | 1  | 1 | 0 | 2  | 146  | 0.014 |
| 573 | 6 | Aggressive behaviour                             | HP:0000718 | 0 | 0 | 0 | 0 | 1  | 1 | 0 | 2  | 121  | 0.017 |
| 574 | 4 | Autistic behaviour                               | HP:0000729 | 0 | 0 | 0 | 2 | 1  | 0 | 0 | 3  | 205  | 0.015 |
| 575 | 4 | Stereotypic behaviours                           | HP:0000733 | 0 | 0 | 0 | 0 | 1  | 0 | 0 | 1  | 66   | 0.015 |
| 576 | 3 | Encephalopathy                                   | HP:0001298 | 0 | 0 | 0 | 0 | 0  | 0 | 1 | 1  | 170  | 0.006 |
| 577 | 4 | Acute encephalopathy                             | HP:0006846 | 0 | 0 | 0 | 0 | 0  | 0 | 1 | 1  | 25   | 0.040 |
| 578 | 1 | Abnormality of the respiratory system            | HP:0002086 | 1 | 0 | 0 | 0 | 3  | 5 | 0 | 9  | 1215 | 0.007 |
| 579 | 2 | Abnormal respiratory system morphology           | HP:0012252 | 1 | 0 | 0 | 0 | 2  | 3 | 0 | 6  | 818  | 0.007 |
| 580 | 3 | Abnormality of the upper respiratory tract       | HP:0002087 | 0 | 0 | 0 | 0 | 1  | 1 | 0 | 2  | 340  | 0.006 |
| 581 | 4 | Abnormality of the larynx                        | HP:0001600 | 0 | 0 | 0 | 0 | 0  | 1 | 0 | 1  | 146  | 0.007 |
| 582 | 5 | Laryngomalacia                                   | HP:0001601 | 0 | 0 | 0 | 0 | 0  | 1 | 0 | 1  | 46   | 0.022 |
| 583 | 4 | Abnormality of the tracheobronchial system       | HP:0005607 | 0 | 0 | 0 | 0 | 1  | 0 | 0 | 1  | 226  | 0.004 |
| 584 | 5 | Abnormality of the bronchi                       | HP:0002109 | 0 | 0 | 0 | 0 | 1  | 0 | 0 | 1  | 108  | 0.009 |
| 585 | 6 | Bronchiectasis                                   | HP:0002110 | 0 | 0 | 0 | 0 | 1  | 0 | 0 | 1  | 84   | 0.012 |
| 586 | 3 | Abnormality of the lung                          | HP:0002088 | 1 | 0 | 0 | 0 | 1  | 2 | 0 | 4  | 676  | 0.006 |
| 587 | 4 | Pneumothorax                                     | HP:0002107 | 0 | 0 | 0 | 0 | 1  | 0 | 0 | 1  | 24   | 0.042 |
| 588 | 4 | Abnormality of the pulmonary vasculature         | HP:0004930 | 1 | 0 | 0 | 0 | 0  | 2 | 0 | 3  | 99   | 0.030 |
| 589 | 5 | Abnormality of the pulmonary artery              | HP:0004414 | 1 | 0 | 0 | 0 | 0  | 2 | 0 | 3  | 81   | 0.037 |
| 590 | 6 | Elevated pulmonary artery pressure               | HP:0004890 | 1 | 0 | 0 | 0 | 0  | 2 | 0 | 3  | 94   | 0.032 |
| 591 | 7 | Pulmonary hypertension                           | HP:0002092 | 1 | 0 | 0 | 0 | 0  | 2 | 0 | 3  | 94   | 0.032 |
| 592 | 2 | Functional respiratory abnormality               | HP:0002795 | 0 | 0 | 0 | 0 | 2  | 3 | 0 | 5  | 816  | 0.006 |
| 593 | 3 | Respiratory insufficiency                        | HP:0002093 | 0 | 0 | 0 | 0 | 2  | 3 | 0 | 5  | 408  | 0.012 |
| 594 | 4 | Neonatal respiratory distress                    | HP:0002643 | 0 | 0 | 0 | 0 | 2  | 2 | 0 | 4  | 23   | 0.174 |
| 595 | 5 | Neonatal asphyxia                                | HP:0012768 | 0 | 0 | 0 | 0 | 0  | 2 | 0 | 2  | 1    | 2.000 |
| 596 | 1 | Abnormality of the skeletal system               | HP:0000924 | 2 | 0 | 0 | 6 | 11 | 5 | 1 | 25 | 2129 | 0.012 |
| 597 | 2 | Abnormality of skeletal morphology               | HP:0011842 | 2 | 0 | 0 | 6 | 11 | 5 | 1 | 25 | 2049 | 0.012 |
| 598 | 3 | Skeletal dysplasia                               | HP:0002652 | 0 | 0 | 0 | 0 | 7  | 0 | 0 | 7  | 149  | 0.047 |
| 599 | 3 | Abnormal axial skeleton morphology               | HP:0009121 | 2 | 0 | 0 | 4 | 2  | 0 | 1 | 9  | 1706 | 0.005 |
| 600 | 4 | Abnormality of the vertebral column              | HP:0000925 | 2 | 0 | 0 | 4 | 1  | 0 | 1 | 8  | 922  | 0.009 |
| 601 | 5 | Abnormality of the vertebrae                     | HP:0003468 | 2 | 0 | 0 | 0 | 0  | 0 | 0 | 2  | 316  | 0.006 |
| 602 | 6 | Abnormal form of the vertebral bodies            | HP:0003312 | 1 | 0 | 0 | 0 | 0  | 0 | 0 | 1  | 235  | 0.004 |
| 603 | 7 | Vertebral clefting                               | HP:0008428 | 1 | 0 | 0 | 0 | 0  | 0 | 0 | 1  | 22   | 0.045 |
| 604 | 8 | Butterfly vertebrae                              | HP:0003316 | 1 | 0 | 0 | 0 | 0  | 0 | 0 | 1  | 10   | 0.100 |
| 605 | 6 | Vertebral segmentation defect                    | HP:0003422 | 1 | 0 | 0 | 0 | 0  | 0 | 0 | 1  | 103  | 0.010 |
| 606 | 5 | Abnormality of the curvature of the vert. column | HP:0010674 | 1 | 0 | 0 | 4 | 1  | 0 | 1 | 7  | 705  | 0.010 |
| 607 | 6 | Scoliosis                                        | HP:0002650 | 1 | 0 | 0 | 4 | 1  | 0 | 1 | 7  | 649  | 0.011 |
| 608 | 7 | Thoracic scoliosis                               | HP:0002943 | 1 | 0 | 0 | 0 | 0  | 0 | 0 | 1  | 14   | 0.071 |
| 609 | 7 | Kyphoscoliosis                                   | HP:0002751 | 1 | 0 | 0 | 0 | 0  | 0 | 0 | 1  | 94   | 0.011 |
| 610 | 4 | Abnormality of the thorax                        | HP:0000765 | 2 | 0 | 0 | 0 | 1  | 0 | 0 | 3  | 541  | 0.006 |
| 611 | 5 | Abnormality of the rib cage                      | HP:0001547 | 2 | 0 | 0 | 0 | 1  | 0 | 0 | 3  | 254  | 0.012 |
| 612 | 6 | Asymmetry of the thorax                          | HP:0001555 | 0 | 0 | 0 | 0 | 1  | 0 | 0 | 1  | 8    | 0.125 |

|     |   |                                              |            |   |   |   |   |   |   |   |    |      |       |
|-----|---|----------------------------------------------|------------|---|---|---|---|---|---|---|----|------|-------|
| 613 | 6 | Abnormality of the ribs                      | HP:0000772 | 2 | 0 | 0 | 0 | 0 | 0 | 0 | 2  | 199  | 0.010 |
| 614 | 7 | Rib fusion                                   | HP:0000902 | 2 | 0 | 0 | 0 | 0 | 0 | 0 | 2  | 27   | 0.074 |
| 615 | 7 | Rib gap                                      | HP:0030280 | 1 | 0 | 0 | 0 | 0 | 0 | 0 | 1  | 1    | 1.000 |
| 616 | 8 | Posterior rib gap                            | HP:0030282 | 1 | 0 | 0 | 0 | 0 | 0 | 0 | 1  | 1    | 1.000 |
| 617 | 3 | Abnormal appendicular skeleton morphology    | HP:0011844 | 1 | 0 | 0 | 0 | 1 | 2 | 0 | 4  | 1084 | 0.004 |
| 618 | 4 | Abnormality of long bone morphology          | HP:0011314 | 1 | 0 | 0 | 0 | 0 | 2 | 0 | 3  | 470  | 0.006 |
| 619 | 5 | Short long bones                             | HP:0003026 | 1 | 0 | 0 | 0 | 0 | 1 | 0 | 2  | 153  | 0.013 |
| 620 | 5 | Abnormality of epiphysis morphology          | HP:0005930 | 0 | 0 | 0 | 0 | 0 | 1 | 0 | 1  | 205  | 0.005 |
| 621 | 6 | Absent epiphyses                             | HP:0010577 | 0 | 0 | 0 | 0 | 0 | 1 | 0 | 1  | 13   | 0.077 |
| 622 | 7 | Absent knee epiphyses                        | HP:0006400 | 0 | 0 | 0 | 0 | 0 | 1 | 0 | 1  | 1    | 1.000 |
| 623 | 4 | Abnormality of pelvic girdle bone morphology | HP:0002644 | 1 | 0 | 0 | 0 | 1 | 0 | 0 | 2  | 388  | 0.005 |
| 624 | 5 | Abnormality of the hip bone                  | HP:0003272 | 1 | 0 | 0 | 0 | 1 | 0 | 0 | 2  | 329  | 0.006 |
| 625 | 6 | Hip dysplasia                                | HP:0001385 | 0 | 0 | 0 | 0 | 1 | 0 | 0 | 1  | 91   | 0.011 |
| 626 | 6 | Abnormality of the ilium                     | HP:0002867 | 1 | 0 | 0 | 0 | 0 | 0 | 0 | 1  | 72   | 0.014 |
| 627 | 7 | Squared iliac bones                          | HP:0003177 | 1 | 0 | 0 | 0 | 0 | 0 | 0 | 1  | 4    | 0.250 |
| 628 | 6 | Abnormality of the hip joint                 | HP:0001384 | 1 | 0 | 0 | 0 | 0 | 0 | 0 | 1  | 200  | 0.005 |
| 629 | 7 | Abnormality of the acetabulum                | HP:0003170 | 1 | 0 | 0 | 0 | 0 | 0 | 0 | 1  | 49   | 0.020 |
| 630 | 8 | Flat acetabular roof                         | HP:0003180 | 1 | 0 | 0 | 0 | 0 | 0 | 0 | 1  | 16   | 0.063 |
| 631 | 3 | Abnormal joint morphology                    | HP:0001367 | 1 | 0 | 0 | 2 | 9 | 3 | 1 | 16 | 999  | 0.016 |
| 632 | 4 | Abnormality of joint mobility                | HP:0011729 | 1 | 0 | 0 | 2 | 9 | 3 | 1 | 16 | 795  | 0.020 |
| 633 | 5 | Joint hypermobility                          | HP:0001382 | 0 | 0 | 0 | 2 | 9 | 0 | 0 | 11 | 229  | 0.048 |
| 634 | 5 | Flexion contracture                          | HP:0001371 | 1 | 0 | 0 | 2 | 1 | 3 | 1 | 8  | 492  | 0.016 |
| 635 | 6 | Congenital contracture                       | HP:0002803 | 0 | 0 | 0 | 0 | 1 | 1 | 0 | 2  | 120  | 0.017 |
| 636 | 7 | Arthrogryposis multiplex congenita           | HP:0002804 | 0 | 0 | 0 | 0 | 1 | 0 | 0 | 1  | 102  | 0.010 |
| 637 | 7 | Distal arthrogryposis                        | HP:0005684 | 0 | 0 | 0 | 0 | 0 | 1 | 0 | 1  | 12   | 0.083 |
| 638 | 6 | Multiple joint contractures                  | HP:0002828 | 0 | 0 | 0 | 0 | 7 | 2 | 0 | 9  | 11   | 0.818 |
| 639 | 6 | Flexion contracture of digit                 | HP:0030044 | 1 | 0 | 0 | 2 | 0 | 2 | 0 | 5  | 216  | 0.023 |
| 640 | 7 | Camptodactyly                                | HP:0012385 | 1 | 0 | 0 | 2 | 0 | 2 | 0 | 5  | 212  | 0.024 |
| 641 | 8 | Camptodactyly of finger                      | HP:0100490 | 1 | 0 | 0 | 2 | 0 | 2 | 0 | 5  | 146  | 0.034 |
| 642 | 9 | Camptodactyly of 2nd - 5th fingers           | HP:0001215 | 1 | 0 | 0 | 1 | 0 | 0 | 0 | 2  | 1    | 2.000 |
| 643 | 6 | Limb joint contracture                       | HP:0003121 | 0 | 0 | 0 | 1 | 0 | 0 | 1 | 2  | 256  | 0.008 |
| 644 | 7 | Contractures of the joints of upper limbs    | HP:0100360 | 0 | 0 | 0 | 1 | 0 | 0 | 1 | 2  | 208  | 0.010 |
| 645 | 8 | Elbow flexion contracture                    | HP:0002987 | 0 | 0 | 0 | 1 | 0 | 0 | 0 | 1  | 46   | 0.022 |
| 646 | 7 | Contractures of the joints of lower limbs    | HP:0005750 | 0 | 0 | 0 | 1 | 0 | 0 | 1 | 2  | 94   | 0.021 |
| 647 | 8 | Knee flexion contracture                     | HP:0006380 | 0 | 0 | 0 | 1 | 0 | 0 | 0 | 1  | 39   | 0.026 |
| 648 | 3 | Abnormal bone structure                      | HP:0003330 | 1 | 0 | 0 | 0 | 1 | 1 | 0 | 3  | 565  | 0.005 |
| 649 | 4 | Abnormal bone ossification                   | HP:0011849 | 0 | 0 | 0 | 0 | 0 | 1 | 0 | 1  | 497  | 0.002 |
| 650 | 5 | Abnormal enchondral ossification             | HP:0003336 | 0 | 0 | 0 | 0 | 0 | 1 | 0 | 1  | 100  | 0.010 |
| 651 | 6 | Abnormal humeral ossification                | HP:0012791 | 0 | 0 | 0 | 0 | 0 | 1 | 0 | 1  | 1    | 1.000 |
| 652 | 7 | Absent humeral epiphyseal ossification       | HP:0003892 | 0 | 0 | 0 | 0 | 0 | 1 | 0 | 1  | 0    | 0.000 |
| 653 | 4 | Abnormality of bone mineral density          | HP:0004348 | 1 | 0 | 0 | 0 | 1 | 0 | 0 | 2  | 419  | 0.005 |

|     |   |                                 |            |   |   |   |   |    |   |   |    |      |       |
|-----|---|---------------------------------|------------|---|---|---|---|----|---|---|----|------|-------|
| 654 | 5 | Reduced bone mineral density    | HP:0004349 | 1 | 0 | 0 | 0 | 1  | 0 | 0 | 2  | 360  | 0.006 |
| 655 | 6 | Osteopenia                      | HP:0000938 | 1 | 0 | 0 | 0 | 1  | 0 | 0 | 2  | 176  | 0.011 |
| 656 | 1 | Growth abnormality              | HP:0001507 | 3 | 0 | 1 | 6 | 14 | 8 | 2 | 34 | 1708 | 0.020 |
| 657 | 2 | Growth delay                    | HP:0001510 | 3 | 0 | 1 | 6 | 3  | 7 | 1 | 21 | 1206 | 0.017 |
| 658 | 3 | Short stature                   | HP:0004322 | 2 | 0 | 1 | 5 | 3  | 3 | 1 | 15 | 919  | 0.016 |
| 659 | 3 | Intrauterine growth retardation | HP:0001511 | 2 | 0 | 0 | 2 | 1  | 5 | 0 | 10 | 319  | 0.031 |
| 660 | 2 | Abnormality of body weight      | HP:0004323 | 1 | 0 | 1 | 3 | 12 | 8 | 1 | 26 | 1060 | 0.025 |
| 661 | 3 | Decreased body weight           | HP:0004325 | 1 | 0 | 1 | 3 | 12 | 8 | 1 | 26 | 870  | 0.030 |
| 662 | 4 | Failure to thrive               | HP:0001508 | 1 | 0 | 1 | 3 | 12 | 8 | 1 | 26 | 637  | 0.041 |
| 663 | 1 | Mortality/Aging                 | HP:0040006 | 0 | 0 | 1 | 0 | 8  | 7 | 0 | 16 | 231  | 0.069 |
| 664 | 2 | Age of death                    | HP:0011420 | 0 | 0 | 1 | 0 | 8  | 7 | 0 | 16 | 231  | 0.069 |
| 665 | 3 | Death in infancy                | HP:0001522 | 0 | 0 | 1 | 0 | 7  | 7 | 0 | 15 | 132  | 0.114 |
| 666 | 3 | Neonatal death                  | HP:0003811 | 0 | 0 | 0 | 0 | 1  | 0 | 0 | 1  | 17   | 0.059 |

**Supplementary Table 3: Genes associated to phenotypic features discussed throughout the manuscript**

| <b>Gene</b>                                                          | <b>Gene name (GeneCards)</b>                              | <b>Gene</b>                                                           | <b>Gene name (GeneCards)</b>                                    |
|----------------------------------------------------------------------|-----------------------------------------------------------|-----------------------------------------------------------------------|-----------------------------------------------------------------|
| <b>Abnormality of temperature regulation (HP:0004370), 244 genes</b> |                                                           | <b>Abnormally lax or hyperextensible skin (HP:0008067), 109 genes</b> |                                                                 |
| ABCA1                                                                | ATP Binding Cassette Subfamily A Member 1                 | ABCC6                                                                 | ATP Binding Cassette Subfamily C Member 6                       |
| ABCA12                                                               | ATP Binding Cassette Subfamily A Member 12                | ACD                                                                   | ACD Shelterin Complex Subunit And Telomerase Recruitment Factor |
| ABCC2                                                                | ATP Binding Cassette Subfamily C Member 2                 | ADAMTS2                                                               | ADAM Metallopeptidase With Thrombospondin Type 1 Motif 2        |
| ABL1                                                                 | ABL Proto-Oncogene 1, Non-Receptor Tyrosine Kinase        | AKT3                                                                  | AKT Serine/Threonine Kinase 3                                   |
| ACADSB                                                               | Acyl-CoA Dehydrogenase Short/Branched Chain               | ALDH18A1                                                              | Aldehyde Dehydrogenase 18 Family Member A1                      |
| ADA                                                                  | Adenosine Deaminase                                       | ANTXR1                                                                | ANTXR Cell Adhesion Molecule 1                                  |
| ADA2                                                                 | Adenosine Deaminase 2                                     | ARID1B                                                                | AT-Rich Interaction Domain 1B                                   |
| ADAMTS13                                                             | ADAM Metallopeptidase With Thrombospondin Type 1 Motif 13 | ATP6V0A2                                                              | ATPase H+ Transporting V0 Subunit A2                            |
| AK2                                                                  | Adenylate Kinase 2                                        | ATP6V1A                                                               | ATPase H+ Transporting V1 Subunit A                             |
| ALG11                                                                | ALG11 Alpha-1,2-Mannosyltransferase                       | ATP6V1E1                                                              | ATPase H+ Transporting V1 Subunit E1                            |
| ALPL                                                                 | Alkaline Phosphatase, Biom mineralization Associated      | ATP7A                                                                 | ATPase Copper Transporting Alpha                                |
| AQP2                                                                 | Aquaporin 2                                               | B3GALT6                                                               | Beta-1,3-Galactosyltransferase 6                                |
| ASCL1                                                                | Achaete-Scute Family BHLH Transcription Factor 1          | B3GAT3                                                                | Beta-1,3-Glucuronyltransferase 3                                |
| ATM                                                                  | ATM Serine/Threonine Kinase                               | B4GALT7                                                               | Beta-1,4-Galactosyltransferase 7                                |
| ATP1A2                                                               | ATPase Na+/K+ Transporting Subunit Alpha 2                | BAZ1B                                                                 | Bromodomain Adjacent To Zinc Finger Domain 1B                   |
| ATP7A                                                                | ATPase Copper Transporting Alpha                          | BRAF                                                                  | B-Raf Proto-Oncogene, Serine/Threonine Kinase                   |
| AVP                                                                  | Arginine Vasopressin                                      | C1R                                                                   | Complement C1r                                                  |
| AVPR2                                                                | Arginine Vasopressin Receptor 2                           | C1S                                                                   | Complement C1s                                                  |
| BCL10                                                                | BCL10 Immune Signaling Adaptor                            | CD96                                                                  | CD96 Molecule                                                   |
| BCL2                                                                 | BCL2 Apoptosis Regulator                                  | CHST14                                                                | Carbohydrate Sulfotransferase 14                                |
| BCL6                                                                 | BCL6 Transcription Repressor                              | CHST3                                                                 | Carbohydrate Sulfotransferase 3                                 |
| BCR                                                                  | BCR Activator Of RhoGEF And GTPase                        | CLIP2                                                                 | CAP-Gly Domain Containing Linker Protein 2                      |
| BDNF                                                                 | Brain Derived Neurotrophic Factor                         | COL1A1                                                                | Collagen Type I Alpha 1 Chain                                   |
| BIRC3                                                                | Baculoviral IAP Repeat Containing 3                       | COL1A2                                                                | Collagen Type I Alpha 2 Chain                                   |
| BLNK                                                                 | B Cell Linker                                             | COL3A1                                                                | Collagen Type III Alpha 1 Chain                                 |
| BRCA2                                                                | BRCA2, DNA Repair Associated                              | COL5A1                                                                | Collagen Type V Alpha 1 Chain                                   |
| BTK                                                                  | Bruton Tyrosine Kinase                                    | COL5A2                                                                | Collagen Type V Alpha 2 Chain                                   |
| BTNL2                                                                | Butyrophilin Like 2                                       | CSTA                                                                  | Cystatin A                                                      |
| C4A                                                                  | Complement C4A (Rodgers Blood Group)                      | DKC1                                                                  | Dyskerin Pseudouridine Synthase 1                               |
| CACNA1A                                                              | Calcium Voltage-Gated Channel Subunit Alpha1 A            | EED                                                                   | Embryonic Ectoderm Development                                  |
| CCND1                                                                | Cyclin D1                                                 | EFEMP2                                                                | EGF Containing Fibulin Like Extracellular Matrix Protein 2      |
| CCR1                                                                 | C-C Motif Chemokine Receptor 1                            | ELN                                                                   | Elastin                                                         |
| CD27                                                                 | CD27 Molecule                                             | ENPP1                                                                 | Ectonucleotide Pyrophosphatase/Phosphodiesterase 1              |
| CD79A                                                                | CD79a Molecule                                            | EXT1                                                                  | Exostosin Glycosyltransferase 1                                 |
| CD79B                                                                | CD79b Molecule                                            | EZH2                                                                  | Enhancer Of Zeste 2 Polycomb Repressive Complex 2 Subunit       |
| CHD7                                                                 | Chromodomain Helicase DNA Binding Protein 7               | FBLN5                                                                 | Fibulin 5                                                       |
| CHEK2                                                                | Checkpoint Kinase 2                                       | FBN1                                                                  | Fibrillin 1                                                     |
| CHRNA1                                                               | Cholinergic Receptor Nicotinic Alpha 1 Subunit            | FGD1                                                                  | FYVE, RhoGEF And PH Domain Containing 1                         |
| CHRND                                                                | Cholinergic Receptor Nicotinic Delta Subunit              | FGF10                                                                 | Fibroblast Growth Factor 10                                     |
| CHRNA3                                                               | Cholinergic Receptor Nicotinic Gamma Subunit              | FGF20                                                                 | Fibroblast Growth Factor 20                                     |
| CLCF1                                                                | Cardiotrophin Like Cytokine Factor 1                      | FGFR2                                                                 | Fibroblast Growth Factor Receptor 2                             |
| CLCN7                                                                | Chloride Voltage-Gated Channel 7                          | FGFR3                                                                 | Fibroblast Growth Factor Receptor 3                             |
| CLEC7A                                                               | C-Type Lectin Domain Containing 7A                        | FIG4                                                                  | FIG4 Phosphoinositide 5-Phosphatase                             |
| COL1A1                                                               | Collagen Type I Alpha 1 Chain                             | FKBP14                                                                | FKBP Prolyl Isomerase 14                                        |
| COX1                                                                 | Mitochondrially Encoded Cytochrome C Oxidase I            | FOXC1                                                                 | Forkhead Box C1                                                 |
| COX2                                                                 | Mitochondrially Encoded Cytochrome C Oxidase II           | GGCX                                                                  | Gamma-Glutamyl Carboxylase                                      |
| COX3                                                                 | Mitochondrially Encoded Cytochrome C Oxidase III          | GORAB                                                                 | Golgin, RAB6 Interacting                                        |
| CRLF1                                                                | Cytokine Receptor Like Factor 1                           | GPX4                                                                  | Glutathione Peroxidase 4                                        |
| CTLA4                                                                | Cytotoxic T-Lymphocyte Associated Protein 4               | GSN                                                                   | Gelsolin                                                        |
| CYBA                                                                 | Cytochrome B-245 Alpha Chain                              | GTF2I                                                                 | General Transcription Factor III                                |
| CYBB                                                                 | Cytochrome B-245 Beta Chain                               | GTF2IRD1                                                              | GTF2I Repeat Domain Containing 1                                |

|                  |                                                              |                 |                                                                                                   |
|------------------|--------------------------------------------------------------|-----------------|---------------------------------------------------------------------------------------------------|
| <i>CYP11B2</i>   | Cytochrome P450 Family 11 Subfamily B Member 2               | <i>HPGD</i>     | 15-Hydroxyprostaglandin Dehydrogenase                                                             |
| <i>CYP21A2</i>   | Cytochrome P450 Family 21 Subfamily A Member 2               | <i>HRAS</i>     | HRas Proto-Oncogene, GTPase                                                                       |
| <i>DBH</i>       | Dopamine Beta-Hydroxylase                                    | <i>IFT43</i>    | Intraflagellar Transport 43                                                                       |
| <i>DCLRE1C</i>   | DNA Cross-Link Repair 1C                                     | <i>KRAS</i>     | KRAS Proto-Oncogene, GTPase                                                                       |
| <i>DDB2</i>      | Damage Specific DNA Binding Protein 2                        | <i>LIMK1</i>    | LIM Domain Kinase 1                                                                               |
| <i>DDC</i>       | Dopa Decarboxylase                                           | <i>LTBP4</i>    | Latent Transforming Growth Factor Beta Binding Protein 4                                          |
| <i>DGUOK</i>     | Deoxyguanosine Kinase                                        | <i>MAP2K1</i>   | Mitogen-Activated Protein Kinase Kinase 1                                                         |
| <i>DIS3L2</i>    | DIS3 Like 3'-5' Exoribonuclease 2                            | <i>MAP2K2</i>   | Mitogen-Activated Protein Kinase Kinase 1                                                         |
| <i>DST</i>       | Dystonin                                                     | <i>MAPRE2</i>   | Microtubule Associated Protein RP/EB Family Member 2                                              |
| <i>EDA</i>       | Ectodysplasin A                                              | <i>MEGF8</i>    | Multiple EGF Like Domains 8                                                                       |
| <i>EDAR</i>      | Ectodysplasin A Receptor                                     | <i>MLXIPL</i>   | MLX Interacting Protein Like                                                                      |
| <i>EDARADD</i>   | EDAR Associated Death Domain                                 | <i>MRPS16</i>   | Mitochondrial Ribosomal Protein S16                                                               |
| <i>EDN3</i>      | Endothelin 3                                                 | <i>MRPS22</i>   | Mitochondrial Ribosomal Protein S22                                                               |
| <i>ELANE</i>     | Elastase, Neutrophil Expressed                               | <i>NAA10</i>    | N(Alpha)-Acetyltransferase 10, NatA Catalytic Subunit                                             |
| <i>ELP1</i>      | Elongator Complex Protein 1                                  | <i>NBAS</i>     | Neuroblastoma Amplified Sequence                                                                  |
| <i>ERAP1</i>     | Endoplasmic Reticulum Aminopeptidase 1                       | <i>NPR2</i>     | Natriuretic Peptide Receptor 2                                                                    |
| <i>ERCC2</i>     | ERCC Excision Repair 2, TFIIH Core Complex Helicase Subunit  | <i>NSD1</i>     | Nuclear Receptor Binding SET Domain Protein 1                                                     |
| <i>ERCC3</i>     | ERCC Excision Repair 3, TFIIH Core Complex Helicase Subunit  | <i>OSMR</i>     | Oncostatin M Receptor                                                                             |
| <i>ERCC4</i>     | ERCC Excision Repair 4, Endonuclease Catalytic Subunit       | <i>PARN</i>     | Poly(A)-Specific Ribonuclease                                                                     |
| <i>ERCC5</i>     | ERCC Excision Repair 5, Endonuclease                         | <i>PAX2</i>     | Paired Box 2                                                                                      |
| <i>F5</i>        | Coagulation Factor V                                         | <i>PDGFRB</i>   | Platelet Derived Growth Factor Receptor Beta                                                      |
| <i>FAS</i>       | Fas Cell Surface Death Receptor                              | <i>PEX1</i>     | Peroxisomal Biogenesis Factor 1                                                                   |
| <i>FBP1</i>      | Fibrillin 1                                                  | <i>PIK3R1</i>   | Phosphoinositide-3-Kinase Regulatory Subunit 1                                                    |
| <i>FOXP1</i>     | Forkhead Box P1                                              | <i>PITX2</i>    | Paired Like Homeodomain 2                                                                         |
| <i>GAA</i>       | Glucosidase Alpha, Acid                                      | <i>PLOD1</i>    | Procollagen-Lysine,2-Oxoglutarate 5-Dioxygenase 1                                                 |
| <i>GALC</i>      | Galactosylceramidase                                         | <i>PRDM5</i>    | PR/SET Domain 5                                                                                   |
| <i>GATA2</i>     | GATA Binding Protein 2                                       | <i>PTDSS1</i>   | Phosphatidylserine Synthase 1                                                                     |
| <i>GCDH</i>      | Glutaryl-CoA Dehydrogenase                                   | <i>PTEN</i>     | Phosphatase And Tensin Homolog                                                                    |
| <i>GCH1</i>      | GTP Cyclohydrolase 1                                         | <i>PTPN11</i>   | Protein Tyrosine Phosphatase, Non-Receptor Type 11                                                |
| <i>GDNF</i>      | Glial Cell Derived Neurotrophic Factor                       | <i>PYCR1</i>    | Pyrroline-5-Carboxylate Reductase 1                                                               |
| <i>GLA</i>       | Galactosidase Alpha                                          | <i>RAF1</i>     | Raf-1 Proto-Oncogene, Serine/Threonine Kinase                                                     |
| <i>GPC3</i>      | Glypican 3                                                   | <i>RFC2</i>     | Replication Factor C Subunit 2                                                                    |
| <i>GPR35</i>     | G Protein-Coupled Receptor 35                                | <i>RIN2</i>     | Ras And Rab Interactor 2                                                                          |
| <i>H19</i>       | H19 Imprinted Maternally Expressed Transcript                | <i>RIT1</i>     | Ras Like Without CAAX 1                                                                           |
| <i>HBB</i>       | Hemoglobin Subunit Beta                                      | <i>RPS6KA3</i>  | Ribosomal Protein S6 Kinase A3                                                                    |
| <i>HERC2</i>     | HECT And RLD Domain Containing E3 Ubiquitin Protein Ligase 2 | <i>RTEL1</i>    | Regulator Of Telomere Elongation Helicase 1                                                       |
| <i>HEXB</i>      | Hexosaminidase Subunit Beta                                  | <i>SKI</i>      | SKI Proto-Oncogene                                                                                |
| <i>HLA-B</i>     | Major Histocompatibility Complex, Class I, B                 | <i>SLC26A2</i>  | Solute Carrier Family 26 Member 2                                                                 |
| <i>HLA-DPB1</i>  | Major Histocompatibility Complex, Class II, DP Beta 1        | <i>SLC2A10</i>  | Solute Carrier Family 2 Member 10                                                                 |
| <i>HLA-DRB1</i>  | Major Histocompatibility Complex, Class II, DR Beta 1        | <i>SLC39A13</i> | Solute Carrier Family 39 Member 13                                                                |
| <i>HMGCL</i>     | 3-Hydroxy-3-Methylglutaryl-CoA Lyase                         | <i>SLC6A8</i>   | Solute Carrier Family 6 Member 8                                                                  |
| <i>HSPG2</i>     | Heparan Sulfate Proteoglycan 2                               | <i>SLC7A7</i>   | Solute Carrier Family 7 Member 7                                                                  |
| <i>HTR1A</i>     | 5-Hydroxytryptamine Receptor 1A                              | <i>SMARCA2</i>  | SWI/SNF Related, Matrix Associated, Actin Dependent Regulator Of Chromatin, Subfamily A, Member 2 |
| <i>IGH</i>       | Immunoglobulin Heavy Locus                                   | <i>SPINT2</i>   | Serine Peptidase Inhibitor, Kunitz Type 2                                                         |
| <i>IGHM</i>      | Immunoglobulin Heavy Constant Mu                             | <i>SRD5A3</i>   | Steroid 5 Alpha-Reductase 3                                                                       |
| <i>IGLL1</i>     | Immunoglobulin Lambda Like Polypeptide 1                     | <i>SUZ12</i>    | SUZ12 Polycomb Repressive Complex 2 Subunit                                                       |
| <i>IKZF1</i>     | IKAROS Family Zinc Finger 1                                  | <i>TBL2</i>     | Transducin Beta Like 2                                                                            |
| <i>IL10</i>      | Interleukin 10                                               | <i>TBX15</i>    | T-Box 15                                                                                          |
| <i>IL12A</i>     | Interleukin 12A                                              | <i>TERT</i>     | Telomerase Reverse Transcriptase                                                                  |
| <i>IL12A-AS1</i> | IL12A Antisense RNA 1                                        | <i>TGM5</i>     | Transglutaminase 5                                                                                |
| <i>IL12B</i>     | Interleukin 12B                                              | <i>TINF2</i>    | TERF1 Interacting Nuclear Factor 2                                                                |
| <i>IL17F</i>     | Interleukin 17F                                              | <i>TNXB</i>     | Tenascin XB                                                                                       |



|                   |                                                                |                |                                                                                      |
|-------------------|----------------------------------------------------------------|----------------|--------------------------------------------------------------------------------------|
| <i>NLRP3</i>      | NLR Family Pyrin Domain Containing 3                           | <i>AGL</i>     | Amylo-Alpha-1, 6-Glucosidase, 4-Alpha-Glucanotransferase                             |
| <i>NME1</i>       | NME/NM23 Nucleoside Diphosphate Kinase 1                       | <i>AGPAT2</i>  | 1-Acylglycerol-3-Phosphate O-Acyltransferase 2                                       |
| <i>NOD2</i>       | Nucleotide Binding Oligomerization Domain Containing 2         | <i>AKR1D1</i>  | Aldo-Keto Reductase Family 1 Member D1                                               |
| <i>NOTCH3</i>     | Notch Receptor 3                                               | <i>ALAS2</i>   | 5'-Aminolevulinate Synthase 2                                                        |
| <i>NPAP1</i>      | Nuclear Pore Associated Protein 1                              | <i>ALDOB</i>   | Aldolase, Fructose-Bisphosphate B                                                    |
| <i>NTRK1</i>      | Neurotrophic Receptor Tyrosine Kinase 1                        | <i>ALG6</i>    | ALG6 Alpha-1,3-Glucosyltransferase                                                   |
| <i>ORAI1</i>      | ORAI Calcium Release-Activated Calcium Modulator 1             | <i>ALMS1</i>   | ALMS1 Centrosome And Basal Body Associated Protein                                   |
| <i>PAX8</i>       | Paired Box 8                                                   | <i>AMACR</i>   | Alpha-Methylacyl-CoA Racemase                                                        |
| <i>PHOX2B</i>     | Paired Like Homeobox 2b                                        | <i>ATM</i>     | ATM Serine/Threonine Kinase                                                          |
| <i>PIK3R1</i>     | Phosphoinositide-3-Kinase Regulatory Subunit 1                 | <i>ATP6AP1</i> | ATPase H+ Transporting Accessory Protein 1                                           |
| <i>POU6F2</i>     | POU Class 6 Homeobox 2                                         | <i>ATP7B</i>   | ATPase Copper Transporting Beta                                                      |
| <i>PRKAR1A</i>    | Protein Kinase CAMP-Dependent Type I Regulatory Subunit Alpha  | <i>ATP8B1</i>  | ATPase Phospholipid Transporting 8B1                                                 |
| <i>PRNP</i>       | Prion Protein                                                  | <i>ATRX</i>    | ATRX, Chromatin Remodeler                                                            |
| <i>PRSS1</i>      | Serine Protease 1                                              | <i>BCS1L</i>   | BCS1 Homolog, Ubiquinol-Cytochrome C Reductase Complex Chaperone                     |
| <i>PRTN3</i>      | Proteinase 3                                                   | <i>BRCA1</i>   | BRCA1, DNA Repair Associated                                                         |
| <i>PSMB8</i>      | Proteasome Subunit Beta 8                                      | <i>BRCA2</i>   | BRCA2, DNA Repair Associated                                                         |
| <i>PSTPIP1</i>    | Proline-Serine-Threonine Phosphatase Interacting Protein 1     | <i>BSCL2</i>   | BSCL2, Seipin Lipid Droplet Biogenesis Associated                                    |
| <i>PTPN22</i>     | Protein Tyrosine Phosphatase Non-Receptor Type 22              | <i>CAVIN1</i>  | Caveolae Associated Protein 1                                                        |
| <i>PTPN3</i>      | Protein Tyrosine Phosphatase Non-Receptor Type 3               | <i>CBS</i>     | Cystathionine-Beta-Synthase                                                          |
| <i>PTS</i>        | 6-Pyruvoyltetrahydropterin Synthase                            | <i>CC2D2A</i>  | Coiled-Coil And C2 Domain Containing 2A                                              |
| <i>PWARI</i>      | Prader Willi/Angelman Region RNA 1                             | <i>CCDC115</i> | Coiled-Coil Domain Containing 115                                                    |
| <i>PWRN1</i>      | Prader-Willi Region Non-Protein Coding RNA 1                   | <i>CD19</i>    | CD19 Molecule                                                                        |
| <i>QDPR</i>       | Quinoid Dihydropteridine Reductase                             | <i>CD81</i>    | CD81 Molecule                                                                        |
| <i>RAB27A</i>     | RAB27A, Member RAS Oncogene Family                             | <i>CDKN2A</i>  | Cyclin Dependent Kinase Inhibitor 2A                                                 |
| <i>RAG1</i>       | Recombination Activating 1                                     | <i>COG2</i>    | COG complex subunit 2                                                                |
| <i>RAG2</i>       | Recombination Activating 2                                     | <i>COG4</i>    | COG complex subunit 4                                                                |
| <i>RB1</i>        | RB Transcriptional Corepressor 1                               | <i>COG6</i>    | COG complex subunit 6                                                                |
| <i>REST</i>       | RE1 Silencing Transcription Factor                             | <i>COG8</i>    | COG complex subunit 8                                                                |
| <i>RET</i>        | Ret Proto-Oncogene                                             | <i>CPT1A</i>   | Carnitine Palmitoyltransferase 1A                                                    |
| <i>RMRP</i>       | RNA Component Of Mitochondrial RNA Processing Endoribonuclease | <i>CPT2</i>    | Carnitine Palmitoyltransferase 2                                                     |
| <i>RUNX1</i>      | RUNX Family Transcription Factor 1                             | <i>CR2</i>     | Complement C3d Receptor 2                                                            |
| <i>RYR1</i>       | Ryanodine Receptor 1                                           | <i>CYC1</i>    | Cytochrome C1                                                                        |
| <i>SCN4A</i>      | Sodium Voltage-Gated Channel Alpha Subunit 4                   | <i>CYP7B1</i>  | Cytochrome P450 Family 7 Subfamily B Member 1                                        |
| <i>SCN9A</i>      | Sodium Voltage-Gated Channel Alpha Subunit 9                   | <i>DAXX</i>    | Death Domain Associated Protein                                                      |
| <i>SHANK3</i>     | SH3 And Multiple Ankyrin Repeat Domains 3                      | <i>DCDC2</i>   | Doublecortin Domain Containing 2                                                     |
| <i>SLC11A1</i>    | Solute Carrier Family 11 Member 1                              | <i>DDOST</i>   | Dolichyl-Diphosphooligosaccharide--Protein Glycosyltransferase Non-Catalytic Subunit |
| <i>SLC12A1</i>    | Solute Carrier Family 12 Member 1                              | <i>DGUOK</i>   | Deoxyguanosine Kinase                                                                |
| <i>SLC19A3</i>    | Solute Carrier Family 19 Member 3                              | <i>DLD</i>     | Dihydrolipoamide Dehydrogenase                                                       |
| <i>SLC25A19</i>   | Solute Carrier Family 25 Member 19                             | <i>DMD</i>     | Dystrophin                                                                           |
| <i>SLC25A20</i>   | Solute Carrier Family 25 Member 20                             | <i>DOLK</i>    | Dolichol Kinase                                                                      |
| <i>SLC29A3</i>    | Solute Carrier Family 29 Member 3                              | <i>DPAGT1</i>  | Dolichyl-Phosphate N-Acetylglucosaminophosphotransferase 2                           |
| <i>SLCO1B1</i>    | Solute Carrier Organic Anion Transporter Family Member 1B1     | <i>DPM1</i>    | Dolichyl-Phosphate Mannosyltransferase Subunit 1, Catalytic                          |
| <i>SLCO1B3</i>    | Solute Carrier Organic Anion Transporter Family Member 1B3     | <i>DPM3</i>    | Dolichyl-Phosphate Mannosyltransferase Subunit 3                                     |
| <i>SNORD115-1</i> | Small Nucleolar RNA, C/D Box 115-1                             | <i>EIF2AK3</i> | Eukaryotic Translation Initiation Factor 2 Alpha Kinase 3                            |
| <i>SNORD116-1</i> | Small Nucleolar RNA, C/D Box 116-1                             | <i>ERCC4</i>   | ERCC Excision Repair 4, Endonuclease Catalytic Subunit                               |
| <i>SNRPN</i>      | Small Nuclear Ribonucleoprotein Polypeptide N                  | <i>F5</i>      | Coagulation Factor V                                                                 |
| <i>SNX10</i>      | Sorting Nexin 10                                               | <i>FAH</i>     | Fumarylacetoacetate Hydrolase                                                        |
| <i>SPINK1</i>     | Serine Peptidase Inhibitor, Kazal Type 1                       | <i>FAN1</i>    | FANCD2 And FANCI Associated Nuclease 1                                               |
| <i>SPR</i>        | Sepiapterin Reductase                                          | <i>FBXL4</i>   | F-Box And Leucine Rich Repeat Protein 4                                              |
| <i>STAC3</i>      | SH3 And Cysteine Rich Domain 3                                 | <i>G6PC</i>    | Glucose-6-Phosphatase Catalytic Subunit                                              |

|                                      |                                                                             |                |                                                                                                                  |                        |
|--------------------------------------|-----------------------------------------------------------------------------|----------------|------------------------------------------------------------------------------------------------------------------|------------------------|
| <i>STAT3</i>                         | Signal Transducer And Activator Of Transcription 3                          | <i>GDF2</i>    | Growth Differentiation Factor 2                                                                                  |                        |
| <i>STAT4</i>                         | Signal Transducer And Activator Of Transcription 4                          | <i>GLRX5</i>   | Glutaredoxin 5                                                                                                   |                        |
| <i>STIM1</i>                         | Stromal Interaction Molecule 1                                              | <i>GNAS</i>    | GNAS Complex Locus                                                                                               |                        |
| <i>STX11</i>                         | Syntaxin 11                                                                 | <i>GNE</i>     | Glucosamine (UDP-N-Acetyl)-2-Epimerase/N-Acetylmannosamine Kinase                                                |                        |
| <i>STXBP2</i>                        | Syntaxin Binding Protein 2                                                  | <i>GNMT</i>    | Glycine N-Methyltransferase                                                                                      |                        |
| <i>TBX3</i>                          | T-Box 3                                                                     | <i>GPD1</i>    | Glycerol-3-Phosphate Dehydrogenase 1                                                                             |                        |
| <i>TCF3</i>                          | Transcription Factor 3                                                      | <i>GPR35</i>   | G Protein-Coupled Receptor 35                                                                                    |                        |
| <i>TCF4</i>                          | Transcription Factor 4                                                      | <i>GYS2</i>    | Glycogen Synthase 2                                                                                              |                        |
| <i>TCIRG1</i>                        | T Cell Immune Regulator 1, ATPase H <sup>+</sup> Transporting V0 Subunit A3 | <i>HADH</i>    | Hydroxyacyl-CoA Dehydrogenase                                                                                    |                        |
| <i>TLR4</i>                          | Toll Like Receptor 4                                                        | <i>HADHA</i>   | Hydroxyacyl-CoA Dehydrogenase/3-Ketoacyl-CoA Thiolase/Enoyl-CoA Hydratase (Trifunctional Protein), Alpha Subunit |                        |
| <i>TMEM165</i>                       | Transmembrane Protein 165                                                   | <i>HADHB</i>   | Hydroxyacyl-CoA Dehydrogenase/3-Ketoacyl-CoA Thiolase/Enoyl-CoA Hydratase (Trifunctional Protein), Beta Subunit  |                        |
| <i>TMEM173</i>                       | Transmembrane Protein 173                                                   | <i>HAMP</i>    | Hepcidin Antimicrobial Peptide                                                                                   |                        |
| <i>TNFAIP3</i>                       | TNF Alpha Induced Protein 3                                                 | <i>HBB</i>     | Hemoglobin Subunit Beta                                                                                          |                        |
| <i>TNFRSF1A</i>                      | TNF Receptor Superfamily Member 1A                                          | <i>HFE</i>     | Hemochromatosis                                                                                                  |                        |
| <i>TNFSF11</i>                       | TNF Superfamily Member 11                                                   | <i>HFE2</i>    | Hemochromatosis Type 2 (Juvenile)                                                                                |                        |
| <i>TP53</i>                          | Tumor Protein P53                                                           | <i>HLA-B</i>   | Major Histocompatibility Complex, Class I, B                                                                     |                        |
| <i>TRAF3IP2</i>                      | TRAF3 Interacting Protein 2                                                 | <i>HNF1A</i>   | HNF1 Homeobox A                                                                                                  |                        |
| <i>TRAPPC9</i>                       | Trafficking Protein Particle Complex 9                                      | <i>HNF1B</i>   | HNF1 Homeobox B                                                                                                  |                        |
| <i>TREX1</i>                         | Three Prime Repair Exonuclease 1                                            | <i>HNF4A</i>   | Hepatocyte Nuclear Factor 4 Alpha                                                                                |                        |
| <i>TRIP13</i>                        | Thyroid Hormone Receptor Interactor 13                                      | <i>HSD17B4</i> | Hydroxysteroid 17-Beta Dehydrogenase 4                                                                           |                        |
| <i>TRNF</i>                          | Mitochondrially Encoded TRNA-Phe (UUU/C)                                    | <i>HSD3B7</i>  | Hydroxy-Delta-5-Steroid Dehydrogenase, 3 Beta-And Steroid Delta-Isomerase 7                                      |                        |
| <i>TRNH</i>                          | Mitochondrially Encoded TRNA-His (CAU/C)                                    | <i>IARS</i>    | Isoleucyl-TRNA Synthetase                                                                                        |                        |
| <i>TRNL1</i>                         | Mitochondrially Encoded TRNA-Leu (UUA/G) 1                                  | <i>ICOS</i>    | Inducible T-Cell Costimulator                                                                                    |                        |
| <i>TRNQ</i>                          | Mitochondrially Encoded TRNA-Gln (CAA/G)                                    | <i>IER3IP1</i> | Immediate Early Response 3 Interacting Protein 1                                                                 |                        |
| <i>TRNS1</i>                         | Mitochondrially Encoded TRNA-Ser (UCN) 1                                    | <i>IFT172</i>  | Intraflagellar Transport 172                                                                                     |                        |
| <i>TRNS2</i>                         | Mitochondrially Encoded TRNA-Ser (AGU/C) 2                                  | <i>IKZF1</i>   | IKAROS Family Zinc Finger 1                                                                                      |                        |
| <i>TRNW</i>                          | Mitochondrially Encoded TRNA-Trp (UGA/G)                                    | <i>INPP5E</i>  | Inositol Polyphosphate-5-Phosphatase E                                                                           |                        |
| <i>TSC1</i>                          | TSC Complex Subunit 1                                                       | <i>JAG1</i>    | Jagged 1                                                                                                         |                        |
| <i>TSC2</i>                          | TSC Complex Subunit 2                                                       | <i>JAK2</i>    | Janus Kinase 2                                                                                                   |                        |
| <i>TSPYL1</i>                        | TSPY Like 1                                                                 | <i>KIF23</i>   | Kinesin Family Member 23                                                                                         |                        |
| <i>UBAC2</i>                         | UBA Domain Containing 2                                                     | <i>KRAS</i>    | KRAS Proto-Oncogene, GTPase                                                                                      |                        |
| <i>UNC13D</i>                        | Unc-13 Homolog D                                                            | <i>LARS</i>    | Leucyl-TRNA Synthetase                                                                                           |                        |
| <i>VPS11</i>                         | VPS11, CORVET/HOPS Core Subunit                                             | <i>LBR</i>     | Lamin B Receptor                                                                                                 |                        |
| <i>WAS</i>                           | WASP Actin Nucleation Promoting Factor                                      | <i>LHX1</i>    | LIM Homeobox 1                                                                                                   |                        |
| <i>WIPF1</i>                         | WAS/WASL Interacting Protein Family Member 1                                | <i>LIPT1</i>   | Lipoyltransferase 1                                                                                              |                        |
| <i>WT1</i>                           | WT1 Transcription Factor                                                    | <i>MARS</i>    | Methionyl-TRNA Synthetase                                                                                        |                        |
| <i>XIAP</i>                          | X-Linked Inhibitor Of Apoptosis                                             | <i>MPV17</i>   | MPV17, Mitochondrial Inner Membrane Protein                                                                      |                        |
| <i>XPA</i>                           | XPA, DNA Damage Recognition And Repair Factor                               | <i>MRPL3</i>   | Mitochondrial Ribosomal Protein L3                                                                               |                        |
| <i>XPC</i>                           | XPC Complex Subunit, DNA Damage Recognition And Repair Factor               | <i>MRPL44</i>  | Mitochondrial Ribosomal Protein L44                                                                              |                        |
| <b>Fever (HP:0001945), 180 genes</b> |                                                                             | <i>MRPS16</i>  | Mitochondrial Ribosomal Protein S16                                                                              | Mitochondrial Membrane |
| <i>ABCC2</i>                         | ATP Binding Cassette Subfamily C Member 2                                   | <i>MS4A1</i>   | Membrane Spanning 4-Domains A1                                                                                   |                        |
| <i>ABL1</i>                          | ABL Proto-Oncogene 1, Non-Receptor Tyrosine Kinase                          | <i>MST1</i>    | Macrophage Stimulating 1                                                                                         |                        |
| <i>ADA</i>                           | Adenosine Deaminase                                                         | <i>MVK</i>     | Mevalonate Kinase                                                                                                |                        |
| <i>ADA2</i>                          | Adenosine Deaminase 2                                                       | <i>NFKB1</i>   | Nuclear Factor Kappa B Subunit 1                                                                                 |                        |
| <i>ADAMTS13</i>                      | ADAM Metallopeptidase With Thrombospondin Type 1 Motif 13                   | <i>NFKB2</i>   | Nuclear Factor Kappa B Subunit 2                                                                                 |                        |
| <i>AK2</i>                           | Adenylate Kinase 2                                                          | <i>NGLY1</i>   | N-Glycanase 1                                                                                                    |                        |
| <i>ALPL</i>                          | Alkaline Phosphatase, Biom mineralization Associated                        | <i>NR1H4</i>   | Nuclear Receptor Subfamily 1 Group H Member 4                                                                    |                        |
| <i>AQP2</i>                          | Aquaporin 2                                                                 | <i>OCLN</i>    | Occludin                                                                                                         |                        |
| <i>ATM</i>                           | ATM Serine/Threonine Kinase                                                 | <i>OFD1</i>    | OFD1, Centriole And Centriolar Satellite Protein                                                                 |                        |
| <i>ATP1A2</i>                        | ATPase Na <sup>+</sup> /K <sup>+</sup> Transporting Subunit Alpha 2         | <i>PALB2</i>   | Partner And Localizer Of BRCA2                                                                                   |                        |
| <i>AVP</i>                           | Arginine Vasopressin                                                        | <i>PALLD</i>   | Palladin, Cytoskeletal Associated Protein                                                                        |                        |
|                                      |                                                                             | <i>PEX13</i>   | Peroxisomal Biogenesis Factor 13                                                                                 |                        |





|                  |                                                                       |                 |                                                                                      |
|------------------|-----------------------------------------------------------------------|-----------------|--------------------------------------------------------------------------------------|
| <i>HLA-B</i>     | Major Histocompatibility Complex, Class I, B                          | <i>AKR1D1</i>   | 1<br>Aldo-Keto Reductase Family 1 Member D1                                          |
| <i>HLA-DPB1</i>  | Major Histocompatibility Complex, Class II, DP Beta 1                 | <i>ALG12</i>    | ALG12 Alpha-1,6-Mannosyltransferase                                                  |
| <i>HLA-DRB1</i>  | Major Histocompatibility Complex, Class II, DR Beta 1                 | <i>ALG2</i>     | ALG2 Alpha-1,3/1,6-Mannosyltransferase                                               |
| <i>HMGCL</i>     | 3-Hydroxy-3-Methylglutaryl-CoA Lyase                                  | <i>ALG6</i>     | ALG6 Alpha-1,3-Glucosyltransferase                                                   |
| <i>HTR1A</i>     | 5-Hydroxytryptamine Receptor 1A                                       | <i>AMACR</i>    | Alpha-Methylacetyl-CoA Racemase                                                      |
| <i>IGH</i>       | Immunoglobulin Heavy Locus                                            | <i>ANO6</i>     | Anoctamin 6                                                                          |
| <i>IGHM</i>      | Immunoglobulin Heavy Constant Mu                                      | <i>ATP6V0A2</i> | ATPase H+ Transporting V0 Subunit A2                                                 |
| <i>IGLL1</i>     | Immunoglobulin Lambda Like Polypeptide 1                              | <i>ATP6V1A</i>  | ATPase H+ Transporting V1 Subunit A                                                  |
| <i>IKZF1</i>     | IKAROS Family Zinc Finger 1                                           | <i>ATP6V1E1</i> | ATPase H+ Transporting V1 Subunit E1                                                 |
| <i>IL10</i>      | Interleukin 10                                                        | <i>B4GALT1</i>  | Beta-1,4-Galactosyltransferase 1                                                     |
| <i>IL12A</i>     | Interleukin 12A                                                       | <i>BCS1L</i>    | BCS1 Homolog, Ubiquinol-Cytochrome C Reductase Complex Chaperone                     |
| <i>IL12A-AS1</i> | IL12A Antisense RNA 1                                                 | <i>BRAF</i>     | B-Raf Proto-Oncogene, Serine/Threonine Kinase                                        |
| <i>IL12B</i>     | Interleukin 12 B                                                      | <i>COG4</i>     | COG complex subunit 4                                                                |
| <i>IL23R</i>     | Interleukin 23 Receptor                                               | <i>CTC1</i>     | CST Telomere Replication Complex Component 1                                         |
| <i>IL2RG</i>     | Interleukin 2 Receptor Subunit Gamma                                  | <i>CYP7B1</i>   | Cytochrome P450 Family 7 Subfamily B Member 1                                        |
| <i>IL36RN</i>    | Interleukin 36 Receptor Antagonist                                    | <i>DDOST</i>    | Dolichyl-Diphosphooligosaccharide--Protein Glycosyltransferase Non-Catalytic Subunit |
| <i>IL6</i>       | Interleukin 6                                                         | <i>DKC1</i>     | Dyskerin Pseudouridine Synthase 1                                                    |
| <i>IL7R</i>      | Interleukin 7 Receptor                                                | <i>DLD</i>      | Dihydrolipoamide Dehydrogenase                                                       |
| <i>IRF8</i>      | Interferon Regulatory Factor 8                                        | <i>DOLK</i>     | Dolichol Kinase                                                                      |
| <i>JAK2</i>      | Janus Kinase 2                                                        | <i>DPAGT1</i>   | Dolichyl-Phosphate N-Acetylglucosaminephosphotransferase 2                           |
| <i>KCNJ1</i>     | Potassium Voltage-Gated Channel Subfamily J Member 1                  | <i>DPM1</i>     | Dolichyl-Phosphate Mannosyltransferase Subunit 1, Catalytic                          |
| <i>KLRC4</i>     | Killer Cell Lectin Like Receptor C4                                   | <i>F10</i>      | Coagulation Factor X                                                                 |
| <i>LACC1</i>     | Laccase Domain Containing 1                                           | <i>F11</i>      | Coagulation Factor XI                                                                |
| <i>LBR</i>       | Lamin B Receptor                                                      | <i>F12</i>      | Coagulation Factor XII                                                               |
| <i>LIFR</i>      | LIF Receptor Alpha                                                    | <i>F13A1</i>    | Coagulation Factor XIII A Chain                                                      |
| <i>LIG4</i>      | DNA Ligase 4                                                          | <i>F13B</i>     | Coagulation Factor XIII B Chain                                                      |
| <i>LIPA</i>      | Lipase A, Lysosomal Acid Type                                         | <i>F2</i>       | Coagulation Factor II, Thrombin                                                      |
| <i>LPIN1</i>     | Lipin 1                                                               | <i>F5</i>       | Coagulation Factor V                                                                 |
| <i>LPIN2</i>     | Lipin 2                                                               | <i>F7</i>       | Coagulation Factor VII                                                               |
| <i>LRRC8A</i>    | Leucine Rich Repeat Containing 8 VRAC Subunit A                       | <i>F8</i>       | Coagulation Factor VIII                                                              |
| <i>LYST</i>      | Lysosomal Trafficking Regulator                                       | <i>F9</i>       | Coagulation Factor IX                                                                |
| <i>MALT1</i>     | MALT1 Paracaspase                                                     | <i>FAH</i>      | Fumarylacetoacetate Hydrolase                                                        |
| <i>MEFV</i>      | MEFV, Pyrin Innate Immunity Regulator                                 | <i>FGA</i>      | Fibrinogen Alpha Chain                                                               |
| <i>MIF</i>       | Macrophage Migration Inhibitory Factor                                | <i>FGB</i>      | Fibrinogen Beta Chain                                                                |
| <i>MLX</i>       | MAX Dimerization Protein MLX                                          | <i>FGG</i>      | Fibrinogen Gamma Chain                                                               |
| <i>MST1</i>      | Macrophage Stimulating 1                                              | <i>FLNA</i>     | Filamin A                                                                            |
| <i>MVK</i>       | Mevalonate Kinase                                                     | <i>GATA2</i>    | GATA Binding Protein 2                                                               |
| <i>MYD88</i>     | Myeloid Differentiation Primary Response 88                           | <i>GATA6</i>    | GATA Binding Protein 6                                                               |
| <i>MYH3</i>      | Myosin Heavy Chain 3                                                  | <i>GFI1B</i>    | Growth Factor Independent 1B Transcriptional Repressor                               |
| <i>NCF1</i>      | Neutrophil Cytosolic Factor 1                                         | <i>GGCX</i>     | Gamma-Glutamyl Carboxylase                                                           |
| <i>NCF2</i>      | Neutrophil Cytosolic Factor 2                                         | <i>GNE</i>      | Glucosamine (UDP-N-Acetyl)-2-Epimerase/N-Acetylmannosamine Kinase                    |
| <i>NCF4</i>      | Neutrophil Cytosolic Factor 4                                         | <i>GPR35</i>    | G Protein-Coupled Receptor 35                                                        |
| <i>ND1</i>       | Mitochondrially Encoded NADH:Ubiquinone Oxidoreductase Core Subunit 1 | <i>HADH</i>     | Hydroxyacyl-CoA Dehydrogenase                                                        |
| <i>ND4</i>       | Mitochondrially Encoded NADH:Ubiquinone Oxidoreductase Core Subunit 4 | <i>HRG</i>      | Histidine Rich Glycoprotein                                                          |
| <i>ND5</i>       | Mitochondrially Encoded NADH:Ubiquinone Oxidoreductase Core Subunit 5 | <i>HSD3B7</i>   | Hydroxy-Delta-5-Steroid Dehydrogenase, 3 Beta-And Steroid Delta-Isomerase 7          |
| <i>ND6</i>       | Mitochondrially Encoded NADH:Ubiquinone Oxidoreductase Core Subunit 6 | <i>IDH1</i>     | Isocitrate Dehydrogenase (NADP(+)) 1, Cytosolic                                      |
| <i>NGF</i>       | Nerve Growth Factor                                                   | <i>IDH2</i>     | Isocitrate Dehydrogenase (NADP(+)) 2, Mitochondrial                                  |
| <i>NGLY1</i>     | N-Glycanase 1                                                         | <i>KAT6B</i>    | Lysine Acetyltransferase 6B                                                          |
| <i>NLRC4</i>     | NLR Family CARD Domain Containing 4                                   | <i>KLKB1</i>    | Kallikrein B1                                                                        |
| <i>NLRP12</i>    | NLR Family Pyrin Domain Containing 12                                 | <i>KRAS</i>     | KRAS Proto-Oncogene, GTPase                                                          |

|                 |                                                                |                 |                                                                             |
|-----------------|----------------------------------------------------------------|-----------------|-----------------------------------------------------------------------------|
| <i>NLRP3</i>    | NLR Family Pyrin Domain Containing 3                           | <i>LARS</i>     | Leucyl-TRNA Synthetase                                                      |
| <i>NME1</i>     | NME/NM23 Nucleoside Diphosphate Kinase 1                       | <i>LMAN1</i>    | Lectin, Mannose Binding 1                                                   |
| <i>NOD2</i>     | Nucleotide Binding Oligomerization Domain Containing 2         | <i>LMNA</i>     | Lamin A/C                                                                   |
| <i>NOTCH3</i>   | Notch Receptor 3                                               | <i>LYST</i>     | Lysosomal Trafficking Regulator                                             |
| <i>NTRK1</i>    | Neurotrophic Receptor Tyrosine Kinase 1                        | <i>LZTR1</i>    | Leucine Zipper Like Transcription Regulator 1                               |
| <i>ORAI1</i>    | ORAI Calcium Release-Activated Calcium Modulator 1             | <i>MAP2K1</i>   | Mitogen-Activated Protein Kinase Kinase 1                                   |
| <i>PIK3R1</i>   | Phosphoinositide-3-Kinase Regulatory Subunit 1                 | <i>MCFD2</i>    | Multiple Coagulation Factor Deficiency 2                                    |
| <i>POU6F2</i>   | POU Class 6 Homeobox 2                                         | <i>MGAT2</i>    | Mannosyl (Alpha-1,6-)-Glycoprotein Beta-1,2-N-Acetylglucosaminyltransferase |
| <i>PRKAR1A</i>  | Protein Kinase CAMP-Dependent Type I Regulatory Subunit Alpha  | <i>MPDU1</i>    | Mannose-P-Dolichol Utilization Defect 1                                     |
| <i>PRNP</i>     | Prion Protein                                                  | <i>MPI</i>      | Mannose Phosphate Isomerase                                                 |
| <i>PRSS1</i>    | Serine Protease 1                                              | <i>MST1</i>     | Macrophage Stimulating 1                                                    |
| <i>PRTN3</i>    | Proteinase 3                                                   | <i>MYD88</i>    | Myeloid Differentiation Primary Response 88                                 |
| <i>PSMB8</i>    | Proteasome Subunit Beta 8                                      | <i>NBEAL2</i>   | Neurobeachin Like 2                                                         |
| <i>PSTPIP1</i>  | Proline-Serine-Threonine Phosphatase Interacting Protein 1     | <i>NHP2</i>     | NHP2 Ribonucleoprotein                                                      |
| <i>PTPN22</i>   | Protein Tyrosine Phosphatase Non-Receptor Type 22              | <i>NOP10</i>    | NOP10 Ribonucleoprotein                                                     |
| <i>PTPN3</i>    | Protein Tyrosine Phosphatase Non-Receptor Type 3               | <i>NR1H4</i>    | Nuclear Receptor Subfamily 1 Group H Member 4                               |
| <i>PTS</i>      | 6-Pyruvoyltetrahydropterin Synthase                            | <i>NRAS</i>     | NRAS Proto-Oncogene, GTPase                                                 |
| <i>QDPR</i>     | Quinoid Dihydropteridine Reductase                             | <i>ORAI1</i>    | ORAI Calcium Release-Activated Calcium Modulator 1                          |
| <i>RAB27A</i>   | RAB27A, Member RAS Oncogene Family                             | <i>PARN</i>     | Poly(A)-Specific Ribonuclease                                               |
| <i>RAG1</i>     | Recombination Activating 1                                     | <i>PEX1</i>     | Peroxisomal Biogenesis Factor 1                                             |
| <i>RAG2</i>     | Recombination Activating 2                                     | <i>PEX10</i>    | Peroxisomal Biogenesis Factor 10                                            |
| <i>RB1</i>      | RB Transcriptional Corepressor 1                               | <i>PEX11B</i>   | Peroxisomal Biogenesis Factor 11B                                           |
| <i>REST</i>     | RE1 Silencing Transcription Factor                             | <i>PEX12</i>    | Peroxisomal Biogenesis Factor 12                                            |
| <i>RMRP</i>     | RNA Component Of Mitochondrial RNA Processing Endoribonuclease | <i>PEX13</i>    | Peroxisomal Biogenesis Factor 13                                            |
| <i>RUNX1</i>    | RUNX Family Transcription Factor 1                             | <i>PEX14</i>    | Peroxisomal Biogenesis Factor 14                                            |
| <i>RYR1</i>     | Ryanodine Receptor 1                                           | <i>PEX16</i>    | Peroxisomal Biogenesis Factor 16                                            |
| <i>SLC11A1</i>  | Solute Carrier Family 11 Member 1                              | <i>PEX19</i>    | Peroxisomal Biogenesis Factor 19                                            |
| <i>SLC12A1</i>  | Solute Carrier Family 12 Member 1                              | <i>PEX2</i>     | Peroxisomal Biogenesis Factor 2                                             |
| <i>SLC19A3</i>  | Solute Carrier Family 19 Member 3                              | <i>PEX26</i>    | Peroxisomal Biogenesis Factor 26                                            |
| <i>SLC29A3</i>  | Solute Carrier Family 29 Member 3                              | <i>PEX3</i>     | Peroxisomal Biogenesis Factor 3                                             |
| <i>SLCO1B1</i>  | Solute Carrier Organic Anion Transporter Family Member 1B1     | <i>PEX5</i>     | Peroxisomal Biogenesis Factor 5                                             |
| <i>SLCO1B3</i>  | Solute Carrier Organic Anion Transporter Family Member 1B3     | <i>PEX6</i>     | Peroxisomal Biogenesis Factor 6                                             |
| <i>SPINK1</i>   | Serine Peptidase Inhibitor, Kazal Type 1                       | <i>PIGA</i>     | Phosphatidylinositol Glycan Anchor Biosynthesis Class A                     |
| <i>STAT3</i>    | Signal Transducer And Activator Of Transcription 3             | <i>PLAT</i>     | Plasminogen Activator, Tissue Type                                          |
| <i>STAT4</i>    | Signal Transducer And Activator Of Transcription 4             | <i>PLG</i>      | Plasminogen                                                                 |
| <i>STIM1</i>    | Stromal Interaction Molecule 1                                 | <i>PMM2</i>     | Phosphomannomutase 2                                                        |
| <i>STX11</i>    | Syntaxin 11                                                    | <i>PRF1</i>     | Perforin 1                                                                  |
| <i>STXBP2</i>   | Syntaxin Binding Protein 2                                     | <i>PROC</i>     | Protein C, Inactivator Of Coagulation Factors Va And VIIIa                  |
| <i>TCF3</i>     | Transcription Factor 3                                         | <i>PROS1</i>    | Protein S                                                                   |
| <i>TCF4</i>     | Transcription Factor 4                                         | <i>PTH1R</i>    | Parathyroid Hormone 1 Receptor                                              |
| <i>TLR4</i>     | Toll Like Receptor 4                                           | <i>PTPN11</i>   | Protein Tyrosine Phosphatase, Non-Receptor Type 11                          |
| <i>TMEM165</i>  | Transmembrane Protein 165                                      | <i>RAF1</i>     | Raf-1 Proto-Oncogene, Serine/Threonine Kinase                               |
| <i>TMEM173</i>  | Transmembrane Protein 173                                      | <i>RASA2</i>    | RAS P21 Protein Activator 2                                                 |
| <i>TNFAIP3</i>  | TNF Alpha Induced Protein 3                                    | <i>RBM8A</i>    | RNA Binding Motif Protein 8A                                                |
| <i>TNFRSF1A</i> | TNF Receptor Superfamily Member 1A                             | <i>RFT1</i>     | RFT1 Homolog                                                                |
| <i>TP53</i>     | Tumor Protein P53                                              | <i>RIT1</i>     | Ras Like Without CAAX 1                                                     |
| <i>TREX1</i>    | Three Prime Repair Exonuclease 1                               | <i>RRAS</i>     | RAS Related                                                                 |
| <i>TRIP13</i>   | Thyroid Hormone Receptor Interactor 13                         | <i>RTKL1</i>    | Regulator Of Telomere Elongation Helicase 1                                 |
| <i>TRNF</i>     | Mitochondrially Encoded TRNA-Phe (UUU/C)                       | <i>RYR1</i>     | Ryanodine Receptor 1                                                        |
| <i>TRNH</i>     | Mitochondrially Encoded TRNA-His (CAU/C)                       | <i>SERAC1</i>   | Serine Active Site Containing 1                                             |
| <i>TRNL1</i>    | Mitochondrially Encoded TRNA-Leu (UUA/G) 1                     | <i>SERPINC1</i> | Serpin Family C Member 1                                                    |
| <i>TRNQ</i>     | Mitochondrially Encoded TRNA-Gln (CAA/G)                       | <i>SERPINF2</i> | Serpin Family H Member 1                                                    |



|                 |                                                                                                      |                 |                                                                                                   |
|-----------------|------------------------------------------------------------------------------------------------------|-----------------|---------------------------------------------------------------------------------------------------|
| <i>ACTB</i>     | Actin Beta                                                                                           | <i>KIF5C</i>    | Kinesin Family Member 5C                                                                          |
| <i>ACTC1</i>    | Actin Alpha Cardiac Muscle 1                                                                         | <i>KLHL15</i>   | Kelch Like Family Member 15                                                                       |
| <i>ACTG1</i>    | Actin Gamma 1                                                                                        | <i>MCOLN1</i>   | Mucolipin 1                                                                                       |
| <i>ACTN2</i>    | Actinin Alpha 2                                                                                      | <i>MDH2</i>     | Malate Dehydrogenase 2                                                                            |
| <i>ACVR1</i>    | Activin A Receptor Type 1                                                                            | <i>MECP2</i>    | Methyl-CpG Binding Protein 2                                                                      |
| <i>ACY1</i>     | Aminoacylase 1                                                                                       | <i>MFF</i>      | Mitochondrial Fission Factor                                                                      |
| <i>ADCY1</i>    | Adenylate Cyclase 1                                                                                  | <i>MFSD2A</i>   | Major Facilitator Superfamily Domain Containing 2A                                                |
| <i>ADGRV1</i>   | Adhesion G Protein-Coupled Receptor V1                                                               | <i>MID2</i>     | Midline 2                                                                                         |
| <i>ADK</i>      | Adenosine Kinase                                                                                     | <i>MPDU1</i>    | Mannose-P-Dolichol Utilization Defect 1                                                           |
| <i>AFF4</i>     | AF4/FMR2 Family Member 4                                                                             | <i>NACCC1</i>   | Nucleus Accumbens Associated 1                                                                    |
| <i>AGBL5</i>    | ATP/GTP Binding Protein Like 5                                                                       | <i>NEXMIF</i>   | Neurite Extension And Migration Factor                                                            |
| <i>AHSG</i>     | Alpha 2-HS Glycoprotein                                                                              | <i>PIGA</i>     | Phosphatidylinositol Glycan Anchor Biosynthesis Class A                                           |
| <i>AIFM1</i>    | Apoptosis Inducing Factor Mitochondria Associated 1                                                  | <i>PIGN</i>     | Phosphatidylinositol Glycan Anchor Biosynthesis Class N                                           |
| <i>AIPL1</i>    | Aryl Hydrocarbon Receptor Interacting Protein Like 1                                                 | <i>PIGV</i>     | Phosphatidylinositol Glycan Anchor Biosynthesis Class V                                           |
| <i>AK2</i>      | Adenylate Kinase 2                                                                                   | <i>PNPT1</i>    | Polyribonucleotide Nucleotidyltransferase 1                                                       |
| <i>AKT1</i>     | AKT Serine/Threonine Kinase 1                                                                        | <i>POMT1</i>    | Protein O-Mannosyltransferase 1                                                                   |
| <i>ALG11</i>    | ALG11 Alpha-1,2-Mannosyltransferase                                                                  | <i>PRDM16</i>   | PR/SET Domain 16                                                                                  |
| <i>ALMS1</i>    | ALMS1 Centrosome And Basal Body Associated Protein                                                   | <i>PRPS1</i>    | Phosphoribosyl Pyrophosphate Synthetase 1                                                         |
| <i>ALOX12B</i>  | Arachidonate 12-Lipoxygenase, 12R Type                                                               | <i>PURA</i>     | Purine Rich Element Binding Protein A                                                             |
| <i>ALOXE3</i>   | Arachidonate Lipoxygenase 3                                                                          | <i>PYCR2</i>    | Pyrroline-5-Carboxylate Reductase 2                                                               |
| <i>ALX3</i>     | ALX Homeobox 3                                                                                       | <i>RARS2</i>    | Arginyl-TRNA Synthetase 2, Mitochondrial                                                          |
| <i>AMER1</i>    | APC Membrane Recruitment Protein 1                                                                   | <i>RERE</i>     | Arginine-Glutamic Acid Dipeptide Repeats                                                          |
| <i>AMMECR1</i>  | Alport Syndrome, Mental Retardation, Midface Hypoplasia And Elliptocytosis Chromosomal Region Gene 1 | <i>SETBP1</i>   | SET Binding Protein 1                                                                             |
| <i>ANKH</i>     | ANKH Inorganic Pyrophosphate Transport Regulator                                                     | <i>SIK1</i>     | Salt Inducible Kinase 1                                                                           |
| <i>ANKRD1</i>   | Ankyrin Repeat Domain 1                                                                              | <i>SKI</i>      | SKI Proto-Oncogene                                                                                |
| <i>ANKRD11</i>  | Ankyrin Repeat Domain 11                                                                             | <i>SLC16A2</i>  | Solute Carrier Family 16 Member 2                                                                 |
| <i>ANOS1</i>    | Anosmin 1                                                                                            | <i>SLC25A12</i> | Solute Carrier Family 25 Member 12                                                                |
| <i>ANTXR1</i>   | ANTXR Cell Adhesion Molecule 1                                                                       | <i>SLC2A1</i>   | Solute Carrier Family 2 Member 1                                                                  |
| <i>AP1S1</i>    | Adaptor Related Protein Complex 1 Subunit Sigma 1                                                    | <i>SLC33A1</i>  | Solute Carrier Family 33 Member 1                                                                 |
| <i>AP1S2</i>    | Adaptor Related Protein Complex 1 Subunit Sigma 2                                                    | <i>SLC9A6</i>   | Solute Carrier Family 9 Member 6                                                                  |
| <i>APC</i>      | APC Regulator Of WNT Signaling Pathway                                                               | <i>SMARCA2</i>  | SWI/SNF Related, Matrix Associated, Actin Dependent Regulator Of Chromatin, Subfamily A, Member 2 |
| <i>APC2</i>     | APC Regulator Of WNT Signaling Pathway 2                                                             | <i>SMARCE1</i>  | SWI/SNF Related, Matrix Associated, Actin Dependent Regulator Of Chromatin, Subfamily E, Member 1 |
| <i>APOPT1</i>   | Cytochrome C Oxidase Assembly Factor 8                                                               | <i>SPATA5</i>   | Spermatogenesis Associated 5                                                                      |
| <i>ARHGDI1A</i> | Rho GDP Dissociation Inhibitor Alpha                                                                 | <i>ST3GAL5</i>  | ST3 Beta-Galactoside Alpha-2,3-Sialyltransferase 5                                                |
| <i>ARHGEF18</i> | Rho/Rac Guanine Nucleotide Exchange Factor 18                                                        | <i>STXBP1</i>   | Syntaxin Binding Protein 1                                                                        |
| <i>ARHGEF6</i>  | Rac/Cdc42 Guanine Nucleotide Exchange Factor 6                                                       | <i>TCF4</i>     | Transcription Factor 4                                                                            |
| <i>ARID1A</i>   | AT-Rich Interaction Domain 1A                                                                        | <i>TCTN2</i>    | Tectonic Family Member 2                                                                          |
| <i>ARID1B</i>   | AT-Rich Interaction Domain 1B                                                                        | <i>TELO2</i>    | Telomere Maintenance 2                                                                            |
| <i>ARID2</i>    | AT-Rich Interaction Domain 2                                                                         | <i>TMEM231</i>  | Transmembrane Protein 231                                                                         |
| <i>ARL2BP</i>   | ADP Ribosylation Factor Like GTPase 2 Binding Protein                                                | <i>UBA5</i>     | Ubiquitin Like Modifier Activating Enzyme 5                                                       |
| <i>ARL6</i>     | ADP Ribosylation Factor Like GTPase 6                                                                | <i>UBE3A</i>    | Ubiquitin Protein Ligase E3A                                                                      |
| <i>ARNT2</i>    | Aryl Hydrocarbon Receptor Nuclear Translocator 2                                                     | <i>UNC80</i>    | Unc-80 Homolog, NALCN Channel Complex Subunit                                                     |
| <i>ARSB</i>     | Arylsulfatase B                                                                                      | <i>UQCRCQ</i>   | Ubiquinol-Cytochrome C Reductase Complex III Subunit VII                                          |
| <i>ARSE</i>     | Arylsulfatase E                                                                                      | <i>VPS11</i>    | VPS11, CORVET/HOPS Core Subunit                                                                   |
| <i>ARVCF</i>    | ARVCF Delta Catenin Family Member                                                                    | <i>WDR45</i>    | WD Repeat Domain 45                                                                               |
| <i>ASCL1</i>    | Achaete-Scute Family BHLH Transcription Factor 1                                                     | <i>ZDHHHC15</i> | Zinc Finger DHHC-Type Containing 15                                                               |
| <i>ASPA</i>     | Aspartoacylase                                                                                       | <i>ZEB2</i>     | Zinc Finger E-Box Binding Homeobox 2                                                              |
| <i>ASPM</i>     | Abnormal Spindle Microtubule Assembly                                                                |                 |                                                                                                   |
| <i>ASXL1</i>    | Additional Sex Combs Like 1, Transcriptional Regulator                                               |                 |                                                                                                   |
| <i>ATP1A2</i>   | ATPase Na <sup>+</sup> /K <sup>+</sup> Transporting Subunit Alpha 2                                  |                 |                                                                                                   |
|                 |                                                                                                      |                 | <b>Multiple joint contractures (HP:0002828), 11 genes</b>                                         |
|                 |                                                                                                      | <i>ALG14</i>    | ALG14 UDP-N-Acetylglucosaminyltransferase Subunit                                                 |









|                 |                                                              |               |                                                             |
|-----------------|--------------------------------------------------------------|---------------|-------------------------------------------------------------|
| <i>DNAI1</i>    | Dynein Axonemal Intermediate Chain 1                         | <i>ERCC2</i>  | ERCC Excision Repair 2, TFIIH Core Complex Helicase Subunit |
| <i>DNAJC3</i>   | DnaJ Heat Shock Protein Family (Hsp40) Member C3             | <i>ERCC5</i>  | ERCC Excision Repair 5, Endonuclease                        |
| <i>DNASE1L3</i> | Deoxyribonuclease 1 Like 3                                   | <i>ERCC6</i>  | ERCC Excision Repair 6, Chromatin Remodeling Factor         |
| <i>DNMT1</i>    | DNA Methyltransferase 1                                      | <i>FAN1</i>   | FANCD2 And FANCI Associated Nuclease 1                      |
| <i>DOLK</i>     | Dolichol Kinase                                              | <i>FARS2</i>  | Phenylalanyl-TRNA Synthetase 2, Mitochondrial               |
| <i>DSG2</i>     | Desmoglein 2                                                 | <i>FGFR3</i>  | Fibroblast Growth Factor Receptor 3                         |
| <i>DSPP</i>     | Dentin Sialophosphoprotein                                   | <i>FLI1</i>   | Fli-1 Proto-Oncogene, ETS Transcription Factor              |
| <i>DUSP6</i>    | Dual Specificity Phosphatase 6                               | <i>FRAS1</i>  | Fraser Extracellular Matrix Complex Subunit 1               |
| <i>DUX4</i>     | Double Homeobox 4                                            | <i>FREM2</i>  | FRAS1 Related Extracellular Matrix Protein 2                |
| <i>DVL1</i>     | Dishevelled Segment Polarity Protein 1                       | <i>GBA</i>    | Glucosylceramidase Beta                                     |
| <i>DVL3</i>     | Dishevelled Segment Polarity Protein 3                       | <i>GCSH</i>   | Glycine Cleavage System Protein H                           |
| <i>EBP</i>      | EBP Cholesterol Delta-Isomerase                              | <i>GDF5</i>   | Growth Differentiation Factor 5                             |
| <i>ECE1</i>     | Endothelin Converting Enzyme 1                               | <i>GLB1</i>   | Galactosidase Beta 1                                        |
| <i>ECHS1</i>    | Enoyl-CoA Hydratase, Short Chain 1                           | <i>GLDC</i>   | Glycine Decarboxylase                                       |
| <i>EDC3</i>     | Enhancer Of MRNA Decapping 3                                 | <i>GLUL</i>   | Glutamine synthetase family                                 |
| <i>EDN1</i>     | Endothelin 1                                                 | <i>GPC3</i>   | Glypican 3                                                  |
| <i>EDN3</i>     | Endothelin 3                                                 | <i>GPC4</i>   | Glypican 4                                                  |
| <i>EDNRA</i>    | Endothelin Receptor Type A                                   | <i>GPR161</i> | G Protein-Coupled Receptor 161                              |
| <i>EDNRB</i>    | Endothelin Receptor Type B                                   | <i>GRIP1</i>  | Glutamate Receptor Interacting Protein 1                    |
| <i>EFNB1</i>    | Ephrin B1                                                    | <i>HDAC6</i>  | Histone Deacetylase 6                                       |
| <i>EFTUD2</i>   | Elongation Factor Tu GTP Binding Domain Containing 2         | <i>HESX1</i>  | HESX Homeobox 1                                             |
| <i>EHMT1</i>    | Euchromatic Histone Lysine Methyltransferase 1               | <i>HSPG2</i>  | Heparan Sulfate Proteoglycan 2                              |
| <i>ELAC2</i>    | ElaC Ribonuclease Z 2                                        | <i>HTRA2</i>  | HtrA Serine Peptidase 2                                     |
| <i>ELMOD3</i>   | ELMO Domain Containing 3                                     | <i>IDUA</i>   | Iduronidase, Alpha-L-                                       |
| <i>ELN</i>      | Elastin                                                      | <i>ITGA6</i>  | Integrin Subunit Alpha 6                                    |
| <i>ENPP1</i>    | Ectonucleotide Pyrophosphatase/Phosphodiesterase 1           | <i>ITGB4</i>  | Integrin Subunit Beta 4                                     |
| <i>EP300</i>    | E1A Binding Protein P300                                     | <i>ITPA</i>   | Inosine Triphosphatase                                      |
| <i>EPG5</i>     | Ectopic P-Granules Autophagy Protein 5 Homolog               | <i>KRAS</i>   | KRAS Proto-Oncogene, GTPase                                 |
| <i>EPS8</i>     | Epidermal Growth Factor Receptor Pathway Substrate 8         | <i>LAMA3</i>  | Laminin Subunit Alpha 3                                     |
| <i>ERCC1</i>    | ERCC Excision Repair 1, Endonuclease Non-Catalytic Subunit   | <i>LAMB3</i>  | Laminin Subunit Beta 3                                      |
| <i>ERCC2</i>    | ERCC Excision Repair 2, TFIIH Core Complex Helicase Subunit  | <i>LAMC2</i>  | Laminin Subunit Gamma 2                                     |
| <i>ERCC3</i>    | ERCC Excision Repair 3, TFIIH Core Complex Helicase Subunit  | <i>LHX4</i>   | LIM Homeobox 4                                              |
| <i>ERCC4</i>    | ERCC Excision Repair 4, Endonuclease Catalytic Subunit       | <i>LIPA</i>   | Lipase A, Lysosomal Acid Type                               |
| <i>ERCC5</i>    | ERCC Excision Repair 5, Endonuclease                         | <i>LIPT1</i>  | Lipoyltransferase 1                                         |
| <i>ERCC6</i>    | ERCC Excision Repair 6, Chromatin Remodeling Factor          | <i>LMNA</i>   | Lamin A/C                                                   |
| <i>ERCC8</i>    | ERCC Excision Repair 8, CSA Ubiquitin Ligase Complex Subunit | <i>LMOD1</i>  | Leiomodin 1                                                 |
| <i>ERF</i>      | ETS2 Repressor Factor                                        | <i>LTC4S</i>  | Leukotriene C4 Synthase                                     |
| <i>ESPN</i>     | Espin                                                        | <i>MESP2</i>  | Mesoderm Posterior BHLH Transcription Factor 2              |
| <i>ESRRB</i>    | Estrogen Related Receptor Beta                               | <i>MLH1</i>   | MutL Homolog 1                                              |
| <i>EXOSC8</i>   | Exosome Component 8                                          | <i>MLH3</i>   | MutL Homolog 3                                              |
| <i>EXT1</i>     | Exostosin Glycosyltransferase 1                              | <i>MRPS22</i> | Mitochondrial Ribosomal Protein S22                         |
| <i>EYA1</i>     | EYA Transcriptional Coactivator And Phosphatase 1            | <i>MSH2</i>   | MutS Homolog 2                                              |
| <i>EYA4</i>     | EYA Transcriptional Coactivator And Phosphatase 4            | <i>MSH6</i>   | MutS Homolog 6                                              |
| <i>EYS</i>      | Eyes Shut Homolog                                            | <i>MYH11</i>  | Myosin Heavy Chain 11                                       |
| <i>FAM161A</i>  | FAM161 Centrosomal Protein A                                 | <i>MYLK</i>   | Myosin Light Chain Kinase                                   |
| <i>FAM20C</i>   | FAM20C Golgi Associated Secretory Pathway Kinase             | <i>MYO5B</i>  | Myosin VB                                                   |
| <i>FANCA</i>    | FA Complementation Group A                                   | <i>NADK2</i>  | NAD Kinase 2, Mitochondrial                                 |
| <i>FANCB</i>    | FA Complementation Group B                                   | <i>NAXE</i>   | NAD(P)HX Epimerase                                          |
| <i>FANCC</i>    | FA Complementation Group C                                   | <i>NRAS</i>   | NRAS Proto-Oncogene, GTPase                                 |
| <i>FANCD2</i>   | FA Complementation Group D2                                  | <i>OCRL</i>   | OCRL, Inositol Polyphosphate-5-Phosphatase                  |
| <i>FANCE</i>    | FA Complementation Group E                                   | <i>PEX1</i>   | Peroxisomal Biogenesis Factor 1                             |
| <i>FANCF</i>    | FA Complementation Group F                                   | <i>PEX10</i>  | Peroxisomal Biogenesis Factor 10                            |
| <i>FANCG</i>    | FA Complementation Group G                                   | <i>PEX11B</i> | Peroxisomal Biogenesis Factor 11B                           |
| <i>FANCI</i>    | FA Complementation Group I                                   | <i>PEX12</i>  | Peroxisomal Biogenesis Factor 12                            |
| <i>FANCL</i>    | FA Complementation Group L                                   | <i>PEX13</i>  | Peroxisomal Biogenesis Factor 13                            |

|                |                                                       |                 |                                                                        |
|----------------|-------------------------------------------------------|-----------------|------------------------------------------------------------------------|
| <i>FANCM</i>   | FA Complementation Group M                            | <i>PEX14</i>    | Peroxisomal Biogenesis Factor 14                                       |
| <i>FARS2</i>   | Phenylalanyl-TRNA Synthetase 2, Mitochondrial         | <i>PEX16</i>    | Peroxisomal Biogenesis Factor 16                                       |
| <i>FAS</i>     | Fas Cell Surface Death Receptor                       | <i>PEX19</i>    | Peroxisomal Biogenesis Factor 19                                       |
| <i>FASTKD2</i> | FAST Kinase Domains 2                                 | <i>PEX2</i>     | Peroxisomal Biogenesis Factor 2                                        |
| <i>FAT4</i>    | FAT Atypical Cadherin 4                               | <i>PEX26</i>    | Peroxisomal Biogenesis Factor 26                                       |
| <i>FBN1</i>    | Fibrillin 1                                           | <i>PEX3</i>     | Peroxisomal Biogenesis Factor 3                                        |
| <i>FERMT1</i>  | Fermitin Family Member 1                              | <i>PEX5</i>     | Peroxisomal Biogenesis Factor 5                                        |
| <i>FEZF1</i>   | FEZ Family Zinc Finger 1                              | <i>PEX6</i>     | Peroxisomal Biogenesis Factor 6                                        |
| <i>FGF10</i>   | Fibroblast Growth Factor 10                           | <i>PHOX2B</i>   | Paired Like Homeobox 2b                                                |
| <i>FGF17</i>   | Fibroblast Growth Factor 17                           | <i>PIGA</i>     | Phosphatidylinositol Glycan Anchor Biosynthesis Class A                |
| <i>FGF3</i>    | Fibroblast Growth Factor 3                            | <i>PIK3CA</i>   | Phosphatidylinositol-4,5-Bisphosphate 3-Kinase Catalytic Subunit Alpha |
| <i>FGF8</i>    | Fibroblast Growth Factor 8                            | <i>PLEC</i>     | Plectin                                                                |
| <i>FGF9</i>    | Fibroblast Growth Factor 9                            | <i>PLXND1</i>   | Plexin D1                                                              |
| <i>FGFR1</i>   | Fibroblast Growth Factor Receptor 1                   | <i>PMS1</i>     | PMS1 Homolog 1, Mismatch Repair System Component                       |
| <i>FGFR2</i>   | Fibroblast Growth Factor Receptor 2                   | <i>PMS2</i>     | PMS1 Homolog 2, Mismatch Repair System Component                       |
| <i>FGFR3</i>   | Fibroblast Growth Factor Receptor 3                   | <i>PQBP1</i>    | Polyglutamine Binding Protein 1                                        |
| <i>FGFRL1</i>  | Fibroblast Growth Factor Receptor Like 1              | <i>PROKR2</i>   | Prokineticin Receptor 2                                                |
| <i>FHL2</i>    | Four And A Half LIM Domains 2                         | <i>PRPS1</i>    | Phosphoribosyl Pyrophosphate Synthetase 1                              |
| <i>FIBP</i>    | FGF1 Intracellular Binding Protein                    | <i>PSAP</i>     | Prosaposin                                                             |
| <i>FIG4</i>    | FIG4 Phosphoinositide 5-Phosphatase                   | <i>PTF1A</i>    | Pancreas Specific Transcription Factor, 1a                             |
| <i>FKBP14</i>  | FKBP Prolyl Isomerase 14                              | <i>RBM8A</i>    | RNA Binding Motif Protein 8A                                           |
| <i>FKTN</i>    | Fukutin                                               | <i>RET</i>      | Ret Proto-Oncogene                                                     |
| <i>FLCN</i>    | Folliculin                                            | <i>REV3L</i>    | REV3 Like, DNA Directed Polymerase Zeta Catalytic Subunit              |
| <i>FLII</i>    | FLII Actin Remodeling Protein                         | <i>RMND1</i>    | Required For Meiotic Nuclear Division 1 Homolog                        |
| <i>FLNA</i>    | Filamin A                                             | <i>ROBO1</i>    | Roundabout Guidance Receptor 1                                         |
| <i>FLNB</i>    | Filamin B                                             | <i>ROR2</i>     | Receptor Tyrosine Kinase Like Orphan Receptor 2                        |
| <i>FLRT3</i>   | Fibronectin Leucine Rich Transmembrane Protein 3      | <i>SCN4A</i>    | Sodium Voltage-Gated Channel Alpha Subunit 4                           |
| <i>FMR1</i>    | Fragile X Mental Retardation 1                        | <i>SCO2</i>     | SCO2, Cytochrome C Oxidase Assembly Protein                            |
| <i>FOXC1</i>   | Forkhead Box C1                                       | <i>SLC25A19</i> | Solute Carrier Family 25 Member 19                                     |
| <i>FOXG1</i>   | Forkhead Box G1                                       | <i>SMOC1</i>    | SPARC Related Modular Calcium Binding 1                                |
| <i>FOXI1</i>   | Forkhead Box I1                                       | <i>SNRPB</i>    | Small Nuclear Ribonucleoprotein Polypeptides B And B1                  |
| <i>FOXRED1</i> | FAD Dependent Oxidoreductase Domain Containing 1      | <i>SUOX</i>     | Sulfite Oxidase                                                        |
| <i>FRAS1</i>   | Fraser Extracellular Matrix Complex Subunit 1         | <i>TFAM</i>     | Transcription Factor A, Mitochondrial                                  |
| <i>FREM2</i>   | FRAS1 Related Extracellular Matrix Protein 2          | <i>TGFBR2</i>   | Transforming Growth Factor Beta Receptor 2                             |
| <i>FRG1</i>    | FSHD Region Gene 1                                    | <i>TMEM70</i>   | Transmembrane Protein 70                                               |
| <i>FSCN2</i>   | Fascin Actin-Bundling Protein 2, Retinal              | <i>TSEN54</i>   | TRNA Splicing Endonuclease Subunit 54                                  |
| <i>FSHR</i>    | Follicle Stimulating Hormone Receptor                 | <i>TSPYL1</i>   | TSPY Like 1                                                            |
| <i>FTO</i>     | FTO Alpha-Ketoglutarate Dependent Dioxygenase         | <i>TUFM</i>     | Tu Translation Elongation Factor, Mitochondrial                        |
| <i>FUCA1</i>   | Alpha-L-Fucosidase 1                                  | <i>UBR1</i>     | Ubiquitin Protein Ligase E3 Component N-Recognin 1                     |
| <i>FXN</i>     | Frataxin                                              | <i>VPS33B</i>   | VPS33B, Late Endosome And Lysosome Associated                          |
| <i>G6PC3</i>   | Glucose-6-Phosphatase Catalytic Subunit 3             | <i>WASHC5</i>   | WASH Complex Subunit 5                                                 |
| <i>GAA</i>     | Glucosidase Alpha, Acid                               | <i>WDR11</i>    | WD Repeat Domain 11                                                    |
| <i>GABBR2</i>  | Gamma-Aminobutyric Acid Type B Receptor Subunit 2     |                 |                                                                        |
| <i>GABRD</i>   | Gamma-Aminobutyric Acid Type A Receptor Delta Subunit |                 |                                                                        |
| <i>GALC</i>    | Galactosylceramidase                                  |                 |                                                                        |
| <i>GALE</i>    | UDP-Galactose-4-Epimerase                             |                 |                                                                        |
| <i>GALNS</i>   | Galactosamine (N-Acetyl)-6-Sulfatase                  |                 |                                                                        |
| <i>GAS8</i>    | Growth Arrest Specific 8                              |                 |                                                                        |
| <i>GATA1</i>   | GATA Binding Protein 1                                |                 |                                                                        |
| <i>GATA2</i>   | GATA Binding Protein 2                                |                 |                                                                        |
| <i>GATA3</i>   | GATA Binding Protein 3                                |                 |                                                                        |
| <i>GATAD1</i>  | GATA Zinc Finger Domain Containing 1                  |                 |                                                                        |
| <i>GBA</i>     | Glucosylceramidase Beta                               |                 |                                                                        |

|                 |                                                                            |
|-----------------|----------------------------------------------------------------------------|
| <i>GBA2</i>     | Glucosylceramidase Beta 2                                                  |
| <i>GCK</i>      | Glucokinase                                                                |
| <i>GDF3</i>     | Growth Differentiation Factor 3                                            |
| <i>GDF5</i>     | Growth Differentiation Factor 5                                            |
| <i>GDF6</i>     | Growth Differentiation Factor 6                                            |
| <i>GDNF</i>     | Glial Cell Derived Neurotrophic Factor                                     |
| <i>GFER</i>     | Growth Factor, Augmenter Of Liver Regeneration                             |
| <i>GIPC3</i>    | GIPC PDZ Domain Containing Family Member 3                                 |
| <i>GJA1</i>     | Gap Junction Protein Alpha 1                                               |
| <i>GJB1</i>     | Gap Junction Protein Beta 1                                                |
| <i>GJB2</i>     | Gap Junction Protein Beta 2                                                |
| <i>GJB3</i>     | Gap Junction Protein Beta 3                                                |
| <i>GJB4</i>     | Gap Junction Protein Beta 4                                                |
| <i>GJB6</i>     | Gap Junction Protein Beta 6                                                |
| <i>GJC2</i>     | Gap Junction Protein Gamma 2                                               |
| <i>GLA</i>      | Galactosidase Alpha                                                        |
| <i>GLB1</i>     | Galactosidase Beta 1                                                       |
| <i>GLI3</i>     | GLI Family Zinc Finger 3                                                   |
| <i>GLIS3</i>    | GLIS Family Zinc Finger 3                                                  |
| <i>GLYCTK</i>   | Glycerate Kinase                                                           |
| <i>GMNN</i>     | Geminin DNA Replication Inhibitor                                          |
| <i>GMPPA</i>    | GDP-Mannose Pyrophosphorylase A                                            |
| <i>GMPPB</i>    | GDP-Mannose Pyrophosphorylase B                                            |
| <i>GNAS</i>     | GNAS Complex Locus                                                         |
| <i>GNRH1</i>    | Gonadotropin Releasing Hormone 1                                           |
| <i>GNRHR</i>    | Gonadotropin Releasing Hormone 1                                           |
| <i>GNS</i>      | Glucosamine (N-Acetyl)-6-Sulfatase                                         |
| <i>GP1BB</i>    | Glycoprotein Ib Platelet Subunit Beta                                      |
| <i>GPC3</i>     | Glypican 3                                                                 |
| <i>GPC4</i>     | Glypican 4                                                                 |
| <i>GPSM2</i>    | G Protein Signaling Modulator 2                                            |
| <i>GRHL2</i>    | Grainyhead Like Transcription Factor 2                                     |
| <i>GRIP1</i>    | Glutamate Receptor Interacting Protein 1                                   |
| <i>GRXCR1</i>   | Glutaredoxin And Cysteine Rich Domain Containing 1                         |
| <i>GRXCR2</i>   | Glutaredoxin And Cysteine Rich Domain Containing 2                         |
| <i>GSC</i>      | Goosecoid Homeobox                                                         |
| <i>GSDME</i>    | Gasdermin E                                                                |
| <i>GTF2E2</i>   | General Transcription Factor IIE Subunit 2                                 |
| <i>GTF2I</i>    | General Transcription Factor Iii                                           |
| <i>GTF2IRD1</i> | GTF2I Repeat Domain Containing 1                                           |
| <i>GUCA1B</i>   | Guanylate Cyclase Activator 1B                                             |
| <i>GUCY2D</i>   | Guanylate Cyclase 2D, Retinal                                              |
| <i>GUSB</i>     | Glucuronidase Beta                                                         |
| <i>HACE1</i>    | HECT Domain And Ankyrin Repeat Containing E3<br>Ubiquitin Protein Ligase 1 |
| <i>HARS</i>     | Histidyl-TRNA Synthetase                                                   |
| <i>HARS2</i>    | Histidyl-TRNA Synthetase 2, Mitochondrial                                  |
| <i>HBB</i>      | Hemoglobin Subunit Beta                                                    |
| <i>HCCS</i>     | Holocytochrome C Synthase                                                  |
| <i>HDAC4</i>    | Histone Deacetylase 4                                                      |
| <i>HDAC8</i>    | Histone Deacetylase 8                                                      |
| <i>HESX1</i>    | HESX Homeobox 1                                                            |
| <i>HGF</i>      | Hepatocyte Growth Factor                                                   |
| <i>HGSNAT</i>   | Heparan-Alpha-Glucosaminide N-Acetyltransferase                            |
| <i>HIRA</i>     | Histone Cell Cycle Regulator                                               |
| <i>HLA-DPB1</i> | Major Histocompatibility Complex, Class II, DP Beta 1                      |
| <i>HNF1B</i>    | HNF1 Homeobox B                                                            |
| <i>HNF4A</i>    | Hepatocyte Nuclear Factor 4 Alpha                                          |
| <i>HOXA1</i>    | Homeobox A1                                                                |
| <i>HOXA11</i>   | Homeobox A11                                                               |

|                 |                                                                       |
|-----------------|-----------------------------------------------------------------------|
| <i>HOXA2</i>    | Homeobox A2                                                           |
| <i>HOXB1</i>    | Homeobox B1                                                           |
| <i>HS6ST1</i>   | Heparan Sulfate 6-O-Sulfotransferase 1                                |
| <i>HSD17B10</i> | Hydroxysteroid 17-Beta Dehydrogenase 10                               |
| <i>HSD17B4</i>  | Hydroxysteroid 17-Beta Dehydrogenase 4                                |
| <i>HTRA2</i>    | HtrA Serine Peptidase 2                                               |
| <i>HYMAI</i>    | Hydatidiform Mole Associated And Imprinted                            |
| <i>IARS</i>     | Isoleucyl-TRNA Synthetase                                             |
| <i>IARS2</i>    | Isoleucyl-TRNA Synthetase 2, Mitochondrial                            |
| <i>IDH3B</i>    | Isocitrate Dehydrogenase (NAD(+)) 3 Beta                              |
| <i>IDS</i>      | Iduronate 2-Sulfatase                                                 |
| <i>IDUA</i>     | Iduronidase, Alpha-L-                                                 |
| <i>IFT140</i>   | Intraflagellar Transport 140                                          |
| <i>IFT172</i>   | Intraflagellar Transport 172                                          |
| <i>IFT27</i>    | Intraflagellar Transport 27                                           |
| <i>IGBP1</i>    | Immunoglobulin Binding Protein 1                                      |
| <i>IGF1</i>     | Insulin Like Growth Factor 1                                          |
| <i>IL17RD</i>   | Interleukin 17 Receptor D                                             |
| <i>ILDR1</i>    | Immunoglobulin Like Domain Containing Receptor 1                      |
| <i>IMPAD1</i>   | Inositol Monophosphatase Domain Containing 1                          |
| <i>IMPDH1</i>   | Inosine Monophosphate Dehydrogenase 1                                 |
| <i>IMPG2</i>    | Interphotoreceptor Matrix Proteoglycan 2                              |
| <i>INS</i>      | Insulin                                                               |
| <i>IQCB1</i>    | IQ Motif Containing B1                                                |
| <i>IQSEC2</i>   | IQ Motif And Sec7 Domain 2                                            |
| <i>IRX5</i>     | Iroquois Homeobox 5                                                   |
| <i>ITGB6</i>    | Integrin Subunit Beta 6                                               |
| <i>ITM2B</i>    | Integral Membrane Protein 2B                                          |
| <i>JMJD1C</i>   | Jumonji Domain Containing 1C                                          |
| <i>KARS</i>     | Lysyl-TRNA Synthetase                                                 |
| <i>KAT6B</i>    | Lysine Acetyltransferase 6B                                           |
| <i>KCNAB2</i>   | Potassium Voltage-Gated Channel Subfamily A Regulatory Beta Subunit 2 |
| <i>KCNC3</i>    | Potassium Voltage-Gated Channel Subfamily C Member 3                  |
| <i>KCNE1</i>    | Potassium Voltage-Gated Channel Subfamily E Regulatory Subunit 1      |
| <i>KCNE5</i>    | Potassium Voltage-Gated Channel Subfamily E Regulatory Subunit 5      |
| <i>KCNH1</i>    | Potassium Voltage-Gated Channel Subfamily H Regulatory Subunit 1      |
| <i>KCNJ10</i>   | Potassium Voltage-Gated Channel Subfamily J Member 10                 |
| <i>KCNJ11</i>   | Potassium Voltage-Gated Channel Subfamily J Member 11                 |
| <i>KCNJ13</i>   | Potassium Voltage-Gated Channel Subfamily J Member 13                 |
| <i>KCNQ1</i>    | Potassium Voltage-Gated Channel Subfamily Q Member 1                  |
| <i>KCNQ4</i>    | Potassium Voltage-Gated Channel Subfamily Q Member 4                  |
| <i>KDM6A</i>    | Lysine Demethylase 6A                                                 |
| <i>KDSR</i>     | 3-Ketodihydrosphingosine Reductase                                    |
| <i>KIF7</i>     | Kinesin Family Member 7                                               |
| <i>KISS1</i>    | KiSS-1 Metastasis Suppressor                                          |
| <i>KISS1R</i>   | KISS1 Receptor                                                        |
| <i>KIT</i>      | KIT Proto-Oncogene, Receptor Tyrosine Kinase                          |
| <i>KITLG</i>    | KIT Ligand                                                            |
| <i>KIZ</i>      | Kizuna Centrosomal Protein                                            |
| <i>KLHL7</i>    | Kelch Like Family Member 7                                            |
| <i>KLLN</i>     | Killin, P53 Regulated DNA Replication Inhibitor                       |
| <i>KMT2A</i>    | Lysine Methyltransferase 2A                                           |
| <i>KMT2D</i>    | Lysine Methyltransferase 2D                                           |
| <i>KRAS</i>     | KRAS Proto-Oncogene, GTPase                                           |

|                 |                                                                             |
|-----------------|-----------------------------------------------------------------------------|
| <i>KYNU</i>     | Kynureninase                                                                |
| <i>L2HGDH</i>   | L-2-Hydroxyglutarate Dehydrogenase                                          |
| <i>LAMA4</i>    | Laminin Subunit Alpha 4                                                     |
| <i>LAMB1</i>    | Laminin Subunit Beta 1                                                      |
| <i>LARS</i>     | Leucyl-TRNA Synthetase                                                      |
| <i>LARS2</i>    | Leucyl-TRNA Synthetase 2, Mitochondrial                                     |
| <i>LCA5</i>     | Lebercilin LCA5                                                             |
| <i>LDB3</i>     | LIM Domain Binding 3                                                        |
| <i>LEMD3</i>    | LEM Domain Containing 3                                                     |
| <i>LETM1</i>    | Leucine Zipper And EF-Hand Containing Transmembrane Protein 1               |
| <i>LHFPL5</i>   | LHFPL Tetraspan Subfamily Member 5                                          |
| <i>LHX1</i>     | LIM Homeobox 1                                                              |
| <i>LHX3</i>     | LIM Homeobox 3                                                              |
| <i>LIG4</i>     | DNA Ligase 4                                                                |
| <i>LIMK1</i>    | LIM Domain Kinase 1                                                         |
| <i>LMNA</i>     | Lamin A/C                                                                   |
| <i>LMNB1</i>    | Lamin B1                                                                    |
| <i>LMNB2</i>    | Lamin B2                                                                    |
| <i>LMX1B</i>    | LIM Homeobox Transcription Factor 1 Beta                                    |
| <i>LONP1</i>    | Lon Peptidase 1, Mitochondrial                                              |
| <i>LOR</i>      | Loricrin                                                                    |
| <i>LOXHD1</i>   | Lipoxygenase Homology Domains 1                                             |
| <i>LRAT</i>     | Lecithin Retinol Acyltransferase                                            |
| <i>LRP2</i>     | LDL Receptor Related Protein 2                                              |
| <i>LRP4</i>     | LDL Receptor Related Protein 4                                              |
| <i>LRP5</i>     | LDL Receptor Related Protein 5                                              |
| <i>LRTOMT</i>   | Leucine Rich Transmembrane And O-Methyltransferase Domain Containing        |
| <i>LZTFL1</i>   | Leucine Zipper Transcription Factor Like 1                                  |
| <i>LZTR1</i>    | Leucine Zipper Like Transcription Regulator 1                               |
| <i>MAD2L2</i>   | Mitotic Arrest Deficient 2 Like 2                                           |
| <i>MAF</i>      | MAF BZIP Transcription Factor                                               |
| <i>MAFB</i>     | MAF BZIP Transcription Factor B                                             |
| <i>MAK</i>      | Male Germ Cell Associated Kinase                                            |
| <i>MAN2B1</i>   | Mannosidase Alpha Class 2B Member 1                                         |
| <i>MANBA</i>    | Mannosidase Beta                                                            |
| <i>MAP2K1</i>   | Mitogen-Activated Protein Kinase Kinase 1                                   |
| <i>MAP3K20</i>  | Mitogen-Activated Protein Kinase Kinase Kinase 20                           |
| <i>MAP3K7</i>   | Mitogen-Activated Protein Kinase Kinase Kinase 7                            |
| <i>MAPK1</i>    | Mitogen-Activated Protein Kinase 1                                          |
| <i>MARS2</i>    | Methionyl-TRNA Synthetase 2, Mitochondrial                                  |
| <i>MARVELD2</i> | MARVEL Domain Containing 2                                                  |
| <i>MASP1</i>    | Mannan Binding Lectin Serine Peptidase 1                                    |
| <i>MBTPS2</i>   | Membrane Bound Transcription Factor Peptidase, Site 2                       |
| <i>MCM2</i>     | Minichromosome Maintenance Complex Component 2                              |
| <i>MCTP2</i>    | Multiple C2 And Transmembrane Domain Containing 2                           |
| <i>MECOM</i>    | MDS1 And EVI1 Complex Locus                                                 |
| <i>MECP2</i>    | Methyl-CpG Binding Protein 2                                                |
| <i>MED12</i>    | Mediator Complex Subunit 12                                                 |
| <i>MEGF8</i>    | Multiple EGF Like Domains 8                                                 |
| <i>MEOX1</i>    | Mesenchyme Homeobox 1                                                       |
| <i>MERTK</i>    | MER Proto-Oncogene, Tyrosine Kinase                                         |
| <i>MFN2</i>     | Mitofusin 2                                                                 |
| <i>MGAT2</i>    | Mannosyl (Alpha-1,6-)-Glycoprotein Beta-1,2-N-Acetylglucosaminyltransferase |
| <i>MGP</i>      | Matrix Gla Protein                                                          |
| <i>MIR96</i>    | MicroRNA 96                                                                 |
| <i>MITF</i>     | Melanocyte Inducing Transcription Factor                                    |
| <i>MKKS</i>     | McKusick-Kaufman Syndrome                                                   |

|                |                                                                       |
|----------------|-----------------------------------------------------------------------|
| <i>MKS1</i>    | MKS Transition Zone Complex Subunit 1                                 |
| <i>MLXIPL</i>  | MLX Interacting Protein Like                                          |
| <i>MOGS</i>    | Mannosyl-Oligosaccharide Glucosidase                                  |
| <i>MORC2</i>   | MORC Family CW-Type Zinc Finger 2                                     |
| <i>MPZ</i>     | Myelin Protein Zero                                                   |
| <i>MSRB3</i>   | Methionine Sulfoxide Reductase B3                                     |
| <i>MYBPC3</i>  | Myosin Binding Protein C, Cardiac                                     |
| <i>MYCN</i>    | MYCN Proto-Oncogene, BHLH Transcription Factor                        |
| <i>MYD88</i>   | Myeloid Differentiation Primary Response 88                           |
| <i>MYH14</i>   | Myosin Heavy Chain 14                                                 |
| <i>MYH3</i>    | Myosin Heavy Chain 3                                                  |
| <i>MYH6</i>    | Myosin Heavy Chain 6                                                  |
| <i>MYH7</i>    | Myosin Heavy Chain 7                                                  |
| <i>MYH9</i>    | Myosin Heavy Chain 9                                                  |
| <i>MYO15A</i>  | Myosin XVA                                                            |
| <i>MYO1A</i>   | Myosin IA                                                             |
| <i>MYO3A</i>   | Myosin IIIA                                                           |
| <i>MYO6</i>    | Myosin VI                                                             |
| <i>MYO7A</i>   | Myosin VIIA                                                           |
| <i>MYPN</i>    | Myopalladin                                                           |
| <i>NAA10</i>   | N(Alpha)-Acetyltransferase 10, NatA Catalytic Subunit                 |
| <i>NAGA</i>    | Alpha-N-Acetylgalactosaminidase                                       |
| <i>NAGLU</i>   | N-Acetyl-Alpha-Glucosaminidase                                        |
| <i>NALCN</i>   | Sodium Leak Channel, Non-Selective                                    |
| <i>ND1</i>     | Mitochondrially Encoded NADH:Ubiquinone Oxidoreductase Core Subunit 1 |
| <i>ND4</i>     | Mitochondrially Encoded NADH:Ubiquinone Oxidoreductase Core Subunit 4 |
| <i>ND5</i>     | Mitochondrially Encoded NADH:Ubiquinone Oxidoreductase Core Subunit 5 |
| <i>ND6</i>     | Mitochondrially Encoded NADH:Ubiquinone Oxidoreductase Core Subunit 6 |
| <i>NDP</i>     | Norrin Cystine Knot Growth Factor NDP                                 |
| <i>NDRG1</i>   | N-Myc Downstream Regulated 1                                          |
| <i>NDUFA1</i>  | NADH:Ubiquinone Oxidoreductase Subunit A1                             |
| <i>NDUFA10</i> | NADH:Ubiquinone Oxidoreductase Subunit A10                            |
| <i>NDUFA11</i> | NADH:Ubiquinone Oxidoreductase Subunit A11                            |
| <i>NDUFA12</i> | NADH:Ubiquinone Oxidoreductase Subunit A12                            |
| <i>NDUFA2</i>  | NADH:Ubiquinone Oxidoreductase Subunit A2                             |
| <i>NDUFA9</i>  | NADH:Ubiquinone Oxidoreductase Subunit A9                             |
| <i>NDUFAF1</i> | NADH:Ubiquinone Oxidoreductase Complex Assembly Factor 1              |
| <i>NDUFAF2</i> | NADH:Ubiquinone Oxidoreductase Complex Assembly Factor 2              |
| <i>NDUFAF3</i> | NADH:Ubiquinone Oxidoreductase Complex Assembly Factor 3              |
| <i>NDUFAF4</i> | NADH:Ubiquinone Oxidoreductase Complex Assembly Factor 4              |
| <i>NDUFAF5</i> | NADH:Ubiquinone Oxidoreductase Complex Assembly Factor 5              |
| <i>NDUFAF6</i> | NADH:Ubiquinone Oxidoreductase Complex Assembly Factor 6              |
| <i>NDUFB11</i> | NADH:Ubiquinone Oxidoreductase Subunit B11                            |
| <i>NDUFB3</i>  | NADH:Ubiquinone Oxidoreductase Subunit B3                             |
| <i>NDUFB9</i>  | NADH:Ubiquinone Oxidoreductase Subunit B9                             |
| <i>NDUFS1</i>  | NADH:Ubiquinone Oxidoreductase Core Subunit S1                        |
| <i>NDUFS2</i>  | NADH:Ubiquinone Oxidoreductase Core Subunit S2                        |
| <i>NDUFS3</i>  | NADH:Ubiquinone Oxidoreductase Core Subunit S3                        |
| <i>NDUFS4</i>  | NADH:Ubiquinone Oxidoreductase Core Subunit S4                        |
| <i>NDUFS6</i>  | NADH:Ubiquinone Oxidoreductase Core Subunit S6                        |
| <i>NDUFS7</i>  | NADH:Ubiquinone Oxidoreductase Core Subunit S7                        |
| <i>NDUFS8</i>  | NADH:Ubiquinone Oxidoreductase Core Subunit S8                        |

|               |                                                                      |
|---------------|----------------------------------------------------------------------|
| <i>NDUFV1</i> | NADH:Ubiquinone Oxidoreductase Core Subunit V1                       |
| <i>NDUFV2</i> | NADH:Ubiquinone Oxidoreductase Core Subunit V2                       |
| <i>NEBL</i>   | Nebulette                                                            |
| <i>NEDD4L</i> | NEDD4 Like E3 Ubiquitin Protein Ligase                               |
| <i>NEK2</i>   | NIMA Related Kinase 2                                                |
| <i>NELFA</i>  | Negative Elongation Factor Complex Member A                          |
| <i>NEU1</i>   | Neuraminidase 1                                                      |
| <i>NEXN</i>   | Nexilin F-Actin Binding Protein                                      |
| <i>NF2</i>    | Neurofibromin 2                                                      |
| <i>NFIX</i>   | Nuclear Factor I X                                                   |
| <i>NHP2</i>   | NHP2 Ribonucleoprotein                                               |
| <i>NIPAL4</i> | NIPA Like Domain Containing 4                                        |
| <i>NIPBL</i>  | NIPBL Cohesin Loading Factor                                         |
| <i>NLRC4</i>  | NLR Family CARD Domain Containing 4                                  |
| <i>NLRP12</i> | NLR Family Pyrin Domain Containing 12                                |
| <i>NLRP3</i>  | NLR Family Pyrin Domain Containing 3                                 |
| <i>NMNAT1</i> | Nicotinamide Nucleotide Adenylyltransferase 1                        |
| <i>NOG</i>    | Noggin                                                               |
| <i>NOP10</i>  | NOP10 Ribonucleoprotein                                              |
| <i>NOTCH2</i> | Notch Receptor 2                                                     |
| <i>NOTCH3</i> | Notch Receptor 3                                                     |
| <i>NPHP1</i>  | Nephrocystin 1                                                       |
| <i>NR2E3</i>  | Nuclear Receptor Subfamily 2 Group E Member 3                        |
| <i>NR5A1</i>  | Nuclear Receptor Subfamily 5 Group A Member 1                        |
| <i>NRAS</i>   | NRAS Proto-Oncogene, GTPase                                          |
| <i>NRL</i>    | Neural Retina Leucine Zipper                                         |
| <i>NRTN</i>   | Neurturin                                                            |
| <i>NSD1</i>   | Nuclear Receptor Binding SET Domain Protein 1                        |
| <i>NSD2</i>   | Nuclear Receptor Binding SET Domain Protein 2                        |
| <i>NSDHL</i>  | NAD(P) Dependent Steroid Dehydrogenase-Like                          |
| <i>NSMF</i>   | NMDA Receptor Synaptonuclear Signaling And Neuronal Migration Factor |
| <i>NSUN2</i>  | NOP2/Sun RNA Methyltransferase 2                                     |
| <i>NTNG1</i>  | Netrin G1                                                            |
| <i>NUBPL</i>  | Nucleotide Binding Protein Like                                      |
| <i>NUP107</i> | Nucleoporin 107                                                      |
| <i>NUS1</i>   | NUS1 Dehydrodolichyl Diphosphate Synthase Subunit                    |
| <i>OFD1</i>   | OFD1, Centriole And Centriolar Satellite Protein                     |
| <i>OPA1</i>   | OPA1 Mitochondrial Dynamin Like GTPase                               |
| <i>ORC1</i>   | Origin Recognition Complex Subunit 1                                 |
| <i>ORC4</i>   | Origin Recognition Complex Subunit 4                                 |
| <i>ORC6</i>   | Origin Recognition Complex Subunit 6                                 |
| <i>OSBPL2</i> | Oxysterol Binding Protein Like 2                                     |
| <i>OTOA</i>   | Otoancorin                                                           |
| <i>OTOF</i>   | Otoferlin                                                            |
| <i>OTOG</i>   | Otogelin                                                             |
| <i>OTOGL</i>  | Otogelin Like                                                        |
| <i>OTUD6B</i> | OTU Domain Containing 6B                                             |
| <i>OTX2</i>   | Orthodenticle Homeobox 2                                             |
| <i>P2RX2</i>  | Purinergic Receptor P2X 2                                            |
| <i>PALB2</i>  | Partner And Localizer Of BRCA2                                       |
| <i>PARN</i>   | Poly(A)-Specific Ribonuclease                                        |
| <i>PAX1</i>   | Paired Box 1                                                         |
| <i>PAX2</i>   | Paired Box 2                                                         |
| <i>PAX3</i>   | Paired Box 3                                                         |
| <i>PCDH15</i> | Protocadherin Related 15                                             |
| <i>PCLO</i>   | Piccolo Presynaptic Cytomatrix Protein                               |
| <i>PCNT</i>   | Pericentrin                                                          |
| <i>PCYT1A</i> | Phosphate Cytidyltransferase 1, Choline, Alpha                       |
| <i>PDE4D</i>  | Phosphodiesterase 4D                                                 |

|                |                                                                        |
|----------------|------------------------------------------------------------------------|
| <i>PDE6A</i>   | Phosphodiesterase 6A                                                   |
| <i>PDE6B</i>   | Phosphodiesterase 6B                                                   |
| <i>PDE6G</i>   | Phosphodiesterase 6G                                                   |
| <i>PDGFRB</i>  | Platelet Derived Growth Factor Receptor Beta                           |
| <i>PDX1</i>    | Pancreatic And Duodenal Homeobox 1                                     |
| <i>PDZD7</i>   | PDZ Domain Containing 7                                                |
| <i>PEPD</i>    | Peptidase D                                                            |
| <i>PET100</i>  | PET100 Cytochrome C Oxidase Chaperone                                  |
| <i>PEX1</i>    | Peroxisomal Biogenesis Factor 1                                        |
| <i>PEX10</i>   | Peroxisomal Biogenesis Factor 10                                       |
| <i>PEX11B</i>  | Peroxisomal Biogenesis Factor 11B                                      |
| <i>PEX12</i>   | Peroxisomal Biogenesis Factor 12                                       |
| <i>PEX13</i>   | Peroxisomal Biogenesis Factor 13                                       |
| <i>PEX14</i>   | Peroxisomal Biogenesis Factor 14                                       |
| <i>PEX16</i>   | Peroxisomal Biogenesis Factor 16                                       |
| <i>PEX19</i>   | Peroxisomal Biogenesis Factor 19                                       |
| <i>PEX2</i>    | Peroxisomal Biogenesis Factor 2                                        |
| <i>PEX26</i>   | Peroxisomal Biogenesis Factor 26                                       |
| <i>PEX3</i>    | Peroxisomal Biogenesis Factor 3                                        |
| <i>PEX5</i>    | Peroxisomal Biogenesis Factor 5                                        |
| <i>PEX6</i>    | Peroxisomal Biogenesis Factor 6                                        |
| <i>PEX7</i>    | Peroxisomal Biogenesis Factor 7                                        |
| <i>PGM3</i>    | Phosphoglucomutase 3                                                   |
| <i>PHEX</i>    | Phosphate Regulating Endopeptidase Homolog X-Linked                    |
| <i>PHF6</i>    | PHD Finger Protein 6                                                   |
| <i>PHOX2B</i>  | Paired Like Homeobox 2b                                                |
| <i>PHYH</i>    | Phytanoyl-CoA 2-Hydroxylase                                            |
| <i>PIEZO1</i>  | Piezo Type Mechanosensitive Ion Channel Component 1                    |
| <i>PIEZO2</i>  | Piezo Type Mechanosensitive Ion Channel Component 2                    |
| <i>PIGA</i>    | Phosphatidylinositol Glycan Anchor Biosynthesis Class A                |
| <i>PIGL</i>    | Phosphatidylinositol Glycan Anchor Biosynthesis Class L                |
| <i>PIGV</i>    | Phosphatidylinositol Glycan Anchor Biosynthesis Class V                |
| <i>PIK3CA</i>  | Phosphatidylinositol-4,5-Bisphosphate 3-Kinase Catalytic Subunit Alpha |
| <i>PIK3R1</i>  | Phosphoinositide-3-Kinase Regulatory Subunit 1                         |
| <i>PITX2</i>   | Paired Like Homeodomain 2                                              |
| <i>PJVK</i>    | Pejvakin                                                               |
| <i>PLA2G6</i>  | Phospholipase A2 Group VI                                              |
| <i>PLAGL1</i>  | PLAG1 Like Zinc Finger 1                                               |
| <i>PLN</i>     | Phospholamban                                                          |
| <i>PLOD3</i>   | Procollagen-Lysine,2-Oxoglutarate 5-Dioxygenase 3                      |
| <i>PLP1</i>    | Proteolipid Protein 1                                                  |
| <i>PLXND1</i>  | Plexin D1                                                              |
| <i>PMP22</i>   | Peripheral Myelin Protein 22                                           |
| <i>PNPLA1</i>  | Patatin Like Phospholipase Domain Containing 1                         |
| <i>PNPLA2</i>  | Patatin Like Phospholipase Domain Containing 2                         |
| <i>PNPLA6</i>  | Patatin Like Phospholipase Domain Containing 6                         |
| <i>PNPLA8</i>  | Patatin Like Phospholipase Domain Containing 8                         |
| <i>PNPT1</i>   | Polyribonucleotide Nucleotidyltransferase 1                            |
| <i>POGZ</i>    | Pogo Transposable Element Derived With ZNF Domain                      |
| <i>POLA1</i>   | DNA Polymerase Alpha 1, Catalytic Subunit                              |
| <i>POLD1</i>   | DNA Polymerase Delta 1, Catalytic Subunit                              |
| <i>POLG</i>    | DNA Polymerase Gamma, Catalytic Subunit                                |
| <i>POLR1C</i>  | RNA Polymerase I And III Subunit C                                     |
| <i>POLR1D</i>  | RNA Polymerase I And III Subunit D                                     |
| <i>POMGNT1</i> | Protein O-Linked Mannose N-Acetylglucosaminyltransferase 1 (Beta 1,2-) |
| <i>POMK</i>    | Protein-O-Mannose Kinase                                               |
| <i>POR</i>     | Cytochrome P450 Oxidoreductase                                         |
| <i>PORCN</i>   | Porcupine O-Acyltransferase                                            |



|                 |                                                               |
|-----------------|---------------------------------------------------------------|
| <i>POU3F4</i>   | POU Class 3 Homeobox 4                                        |
| <i>POU4F3</i>   | POU Class 4 Homeobox 3                                        |
| <i>PPP1R15B</i> | Protein Phosphatase 1 Regulatory Subunit 15B                  |
| <i>PQBP1</i>    | Polyglutamine Binding Protein 1                               |
| <i>PRCD</i>     | Photoreceptor Disc Component                                  |
| <i>PRDM16</i>   | PR/SET Domain 16                                              |
| <i>PRDM5</i>    | PR/SET Domain 5                                               |
| <i>PRKAR1A</i>  | Protein Kinase CAMP-Dependent Type I Regulatory Subunit Alpha |
| <i>PRKDC</i>    | Protein Kinase, DNA-Activated, Catalytic Subunit              |
| <i>PROK2</i>    | Prokineticin 2                                                |
| <i>PROKR2</i>   | Prokineticin Receptor 2                                       |
| <i>PROM1</i>    | Prominin 1                                                    |
| <i>PRPF3</i>    | Pre-mRNA Processing Factor 3                                  |
| <i>PRPF31</i>   | Pre-mRNA Processing Factor 31                                 |
| <i>PRPF4</i>    | Pre-mRNA Processing Factor 4                                  |
| <i>PRPF6</i>    | Pre-mRNA Processing Factor 6                                  |
| <i>PRPF8</i>    | Pre-mRNA Processing Factor 8                                  |
| <i>PRPH2</i>    | Peripherin 2                                                  |
| <i>PRPS1</i>    | Phosphoribosyl Pyrophosphate Synthetase 1                     |
| <i>PRRT2</i>    | Proline Rich Transmembrane Protein 2                          |
| <i>PRRX1</i>    | Paired Related Homeobox 1                                     |
| <i>PRTN3</i>    | Proteinase 3                                                  |
| <i>PSEN1</i>    | Presenilin 1                                                  |
| <i>PSEN2</i>    | Presenilin 2                                                  |
| <i>PSMC3IP</i>  | PSMC3 Interacting Protein                                     |
| <i>PTDSS1</i>   | Phosphatidylserine Synthase 1                                 |
| <i>PTEN</i>     | Phosphatase And Tensin Homolog                                |
| <i>PTH1R</i>    | Parathyroid Hormone 1 Receptor                                |
| <i>PTPN11</i>   | Protein Tyrosine Phosphatase, Non-Receptor Type 11            |
| <i>PTPN22</i>   | Protein Tyrosine Phosphatase Non-Receptor Type 22             |
| <i>PTPRQ</i>    | Protein Tyrosine Phosphatase Receptor Type Q                  |
| <i>PTRH2</i>    | Peptidyl-TRNA Hydrolase 2                                     |
| <i>PYCR2</i>    | Pyrroline-5-Carboxylate Reductase 2                           |
| <i>RAB23</i>    | RAB23, Member RAS Oncogene Family                             |
| <i>RAD21</i>    | RAD21 Cohesin Complex Component                               |
| <i>RAD51</i>    | RAD51 Recombinase                                             |
| <i>RAD51C</i>   | RAD51 Paralog C                                               |
| <i>RAF1</i>     | Raf-1 Proto-Oncogene, Serine/Threonine Kinase                 |
| <i>RAI1</i>     | Retinoic Acid Induced 1                                       |
| <i>RAP1A</i>    | RAP1A, Member Of RAS Oncogene Family                          |
| <i>RAP1B</i>    | RAP1B, Member Of RAS Oncogene Family                          |
| <i>RASA2</i>    | RAS P21 Protein Activator 2                                   |
| <i>RBM20</i>    | RNA Binding Motif Protein 20                                  |
| <i>RBM8A</i>    | RNA Binding Motif Protein 8A                                  |
| <i>RBP3</i>     | Retinol Binding Protein 3                                     |
| <i>RD3</i>      | Retinal Degeneration 3, GUCY2D Regulator                      |
| <i>RDH12</i>    | Retinol Dehydrogenase 12                                      |
| <i>RDX</i>      | Radixin                                                       |
| <i>RECQL4</i>   | RecQ Like Helicase 4                                          |
| <i>REEP6</i>    | Receptor Accessory Protein 6                                  |
| <i>RERE</i>     | Arginine-Glutamic Acid Dipeptide Repeats                      |
| <i>RET</i>      | Ret Proto-Oncogene                                            |
| <i>REV3L</i>    | REV3 Like, DNA Directed Polymerase Zeta Catalytic Subunit     |
| <i>RFC2</i>     | Replication Factor C Subunit 2                                |
| <i>RFT1</i>     | RFT1 Homolog                                                  |
| <i>RGR</i>      | Retinal G Protein Coupled Receptor                            |
| <i>RHO</i>      | Rhodopsin                                                     |
| <i>RIPOR2</i>   | RHO Family Interacting Cell Polarization Regulator 2          |

|                 |                                                                |
|-----------------|----------------------------------------------------------------|
| <i>RIT1</i>     | Ras Like Without CAAX 1                                        |
| <i>RLBP1</i>    | Retinaldehyde Binding Protein 1                                |
| <i>RMND1</i>    | Required For Meiotic Nuclear Division 1 Homolog                |
| <i>RNASET2</i>  | Ribonuclease T2                                                |
| <i>RNF135</i>   | Ring Finger Protein 135                                        |
| <i>RNR1</i>     | RNA, Ribosomal 45S Cluster 1                                   |
| <i>ROBO3</i>    | Roundabout Guidance Receptor 3                                 |
| <i>ROM1</i>     | Retinal Outer Segment Membrane Protein 1                       |
| <i>ROR2</i>     | Receptor Tyrosine Kinase Like Orphan Receptor 2                |
| <i>RP1</i>      | RP1 Axonemal Microtubule Associated                            |
| <i>RP2</i>      | RP2 Activator Of ARL3 GTPase                                   |
| <i>RP9</i>      | RP9 Pre-mRNA Splicing Factor                                   |
| <i>RPE65</i>    | Retinoid Isomerohydrolase RPE65                                |
| <i>RPGR</i>     | Retinitis Pigmentosa GTPase Regulator                          |
| <i>RPGRIP1</i>  | RPGR Interacting Protein 1                                     |
| <i>RPL10</i>    | Ribosomal Protein L10                                          |
| <i>RPL11</i>    | Ribosomal Protein L11                                          |
| <i>RPS23</i>    | Ribosomal Protein S23                                          |
| <i>RPS26</i>    | Ribosomal Protein S26                                          |
| <i>RPS28</i>    | Ribosomal Protein S28                                          |
| <i>RPS6KA3</i>  | Ribosomal Protein S6 Kinase A3                                 |
| <i>RRAS</i>     | RAS Related                                                    |
| <i>RREB1</i>    | Ras Responsive Element Binding Protein 1                       |
| <i>RRM2B</i>    | Ribonucleotide Reductase Regulatory TP53 Inducible Subunit M2B |
| <i>RTEL1</i>    | Regulator Of Telomere Elongation Helicase 1                    |
| <i>RUNX2</i>    | RUNX Family Transcription Factor 2                             |
| <i>S1PR2</i>    | Sphingosine-1-Phosphate Receptor 2                             |
| <i>SAG</i>      | S-Antigen Visual Arrestin                                      |
| <i>SALL1</i>    | Spalt Like Transcription Factor 1                              |
| <i>SALL4</i>    | Spalt Like Transcription Factor 4                              |
| <i>SBF2</i>     | SET Binding Factor 2                                           |
| <i>SC5D</i>     | Sterol-C5-Desaturase                                           |
| <i>SCN1A</i>    | Sodium Voltage-Gated Channel Alpha Subunit 1                   |
| <i>SCN5A</i>    | Sodium Voltage-Gated Channel Alpha Subunit 5                   |
| <i>SCO1</i>     | SCO Cytochrome C Oxidase Assembly Protein 1                    |
| <i>SDCCAG8</i>  | Serologically Defined Colon Cancer Antigen 8                   |
| <i>SDHA</i>     | Succinate Dehydrogenase Complex Flavoprotein Subunit A         |
| <i>SDHB</i>     | Succinate Dehydrogenase Complex Iron Sulfur Subunit B          |
| <i>SDHC</i>     | Succinate Dehydrogenase Complex Subunit C                      |
| <i>SDHD</i>     | Succinate Dehydrogenase Complex Subunit D                      |
| <i>SEC23B</i>   | SEC23 Homolog B, Coat Complex II Component                     |
| <i>SEC24C</i>   | SEC24 Homolog C, COPII Coat Complex Component                  |
| <i>SEM1</i>     | SEM1 26S Proteasome Complex Subunit                            |
| <i>SEMA3A</i>   | Semaphorin 3A                                                  |
| <i>SEMA3C</i>   | Semaphorin 3C                                                  |
| <i>SEMA3D</i>   | Semaphorin 3D                                                  |
| <i>SEMA3E</i>   | Semaphorin 3E                                                  |
| <i>SEMA4A</i>   | Semaphorin 4A                                                  |
| <i>SERAC1</i>   | Serine Active Site Containing 1                                |
| <i>SERPINB6</i> | Serpin Family B Member 6                                       |
| <i>SETD2</i>    | SET Domain Containing 2                                        |
| <i>SETD5</i>    | SET Domain Containing 5                                        |
| <i>SF3B4</i>    | Splicing Factor 3b Subunit 4                                   |
| <i>SGCD</i>     | Sarcoglycan Delta                                              |
| <i>SGSH</i>     | N-Sulfoglucosamine Sulfohydrolase                              |
| <i>SH3TC2</i>   | SH3 Domain And Tetratricopeptide Repeats 2                     |
| <i>SHANK3</i>   | SH3 And Multiple Ankyrin Repeat Domains 3                      |
| <i>SHOC2</i>    | SHOC2 Leucine Rich Repeat Scaffold Protein                     |

|                 |                                                                                                   |
|-----------------|---------------------------------------------------------------------------------------------------|
| <i>SIN3A</i>    | SIN3 Transcription Regulator Family Member A                                                      |
| <i>SIX1</i>     | SIX Homeobox 1                                                                                    |
| <i>SIX5</i>     | SIX Homeobox 5                                                                                    |
| <i>SIX6</i>     | SIX Homeobox 6                                                                                    |
| <i>SKI</i>      | SKI Proto-Oncogene                                                                                |
| <i>SLC17A8</i>  | Solute Carrier Family 17 Member 8                                                                 |
| <i>SLC19A2</i>  | Solute Carrier Family 19 Member 2                                                                 |
| <i>SLC25A4</i>  | Solute Carrier Family 25 Member 4                                                                 |
| <i>SLC26A2</i>  | Solute Carrier Family 26 Member 2                                                                 |
| <i>SLC26A4</i>  | Solute Carrier Family 26 Member 4                                                                 |
| <i>SLC26A5</i>  | Solute Carrier Family 26 Member 5                                                                 |
| <i>SLC29A3</i>  | Solute Carrier Family 29 Member 3                                                                 |
| <i>SLC33A1</i>  | Solute Carrier Family 33 Member 1                                                                 |
| <i>SLC39A8</i>  | Solute Carrier Family 39 Member 8                                                                 |
| <i>SLC4A11</i>  | Solute Carrier Family 4 Member 11                                                                 |
| <i>SLC52A2</i>  | Solute Carrier Family 52 Member 2                                                                 |
| <i>SLC52A3</i>  | Solute Carrier Family 52 Member 3                                                                 |
| <i>SLC7A14</i>  | Solute Carrier Family 7 Member 14                                                                 |
| <i>SLITRK6</i>  | SLIT And NTRK Like Family Member 6                                                                |
| <i>SLX4</i>     | SLX4 Structure-Specific Endonuclease Subunit                                                      |
| <i>SMAD4</i>    | SMAD Family Member 4                                                                              |
| <i>SMARCA4</i>  | SWI/SNF Related, Matrix Associated, Actin Dependent Regulator Of Chromatin, Subfamily A, Member 4 |
| <i>SMARCB1</i>  | SWI/SNF Related, Matrix Associated, Actin Dependent Regulator Of Chromatin, Subfamily B, Member 1 |
| <i>SMARCE1</i>  | SWI/SNF Related, Matrix Associated, Actin Dependent Regulator Of Chromatin, Subfamily E, Member 1 |
| <i>SMC1A</i>    | Structural Maintenance Of Chromosomes 1A                                                          |
| <i>SMC3</i>     | Structural Maintenance Of Chromosomes 3                                                           |
| <i>SMCHD1</i>   | Structural Maintenance Of Chromosomes Flexible Hinge Domain Containing 1                          |
| <i>SNAI2</i>    | Snail Family Transcriptional Repressor 2                                                          |
| <i>SNAP29</i>   | Synaptosome Associated Protein 29                                                                 |
| <i>SNRNP200</i> | Small Nuclear Ribonucleoprotein U5 Subunit 200                                                    |
| <i>SNRNPB</i>   | Small Nuclear Ribonucleoprotein Polypeptides B And B1                                             |
| <i>SNX10</i>    | Sorting Nexin 10                                                                                  |
| <i>SNX14</i>    | Sorting Nexin 14                                                                                  |
| <i>SOS1</i>     | SOS Ras/Rac Guanine Nucleotide Exchange Factor 1                                                  |
| <i>SOS2</i>     | SOS Ras/Rac Guanine Nucleotide Exchange Factor 2                                                  |
| <i>SOST</i>     | Sclerostin                                                                                        |
| <i>SOX10</i>    | SRY-Box 10                                                                                        |
| <i>SOX11</i>    | SRY-Box 11                                                                                        |
| <i>SOX2</i>     | SRY-Box 2                                                                                         |
| <i>SOX3</i>     | SRY-Box 3                                                                                         |
| <i>SOX9</i>     | SRY-Box 9                                                                                         |
| <i>SPATA5</i>   | Spermatogenesis Associated 5                                                                      |
| <i>SPATA7</i>   | Spermatogenesis Associated 7                                                                      |
| <i>SPECC1L</i>  | Sperm Antigen With Calponin Homology And Coiled-Coil Domains 1 Like                               |
| <i>SPIDR</i>    | Scaffold Protein Involved In DNA Repair                                                           |
| <i>SPRY4</i>    | Sprouty RTK Signaling Antagonist 4                                                                |
| <i>SPTLC1</i>   | Serine Palmitoyltransferase Long Chain Base Subunit 1                                             |
| <i>SQSTM1</i>   | Sequestosome 1                                                                                    |
| <i>SRCAP</i>    | Snf2 Related CREBBP Activator Protein                                                             |
| <i>SRP72</i>    | Signal Recognition Particle 72                                                                    |
| <i>SRY</i>      | Sex Determining Region Y                                                                          |
| <i>ST3GAL5</i>  | ST3 Beta-Galactoside Alpha-2,3-Sialyltransferase 5                                                |
| <i>STAMBP</i>   | STAM Binding Protein                                                                              |
| <i>STAT3</i>    | Signal Transducer And Activator Of Transcription 3                                                |
| <i>STRC</i>     | Stereocilin                                                                                       |
| <i>SUCLA2</i>   | Succinate-CoA Ligase ADP-Forming Beta Subunit                                                     |

|                  |                                                                 |
|------------------|-----------------------------------------------------------------|
| <i>SUCLG1</i>    | Succinate-CoA Ligase Alpha Subunit                              |
| <i>SUMF1</i>     | Sulfatase Modifying Factor 1                                    |
| <i>SURF1</i>     | SURF1 Cytochrome C Oxidase Assembly Factor                      |
| <i>SYNE4</i>     | Spectrin Repeat Containing Nuclear Envelope Family Member 4     |
| <i>SYT2</i>      | Synaptotagmin 2                                                 |
| <i>TAC3</i>      | Tachykinin 3                                                    |
| <i>TACO1</i>     | Translational Activator Of Cytochrome C Oxidase I               |
| <i>TACR3</i>     | Tachykinin Receptor 3                                           |
| <i>TAF1</i>      | TATA-Box Binding Protein Associated Factor 1                    |
| <i>TANGO2</i>    | Transport And Golgi Organization 2 Homolog                      |
| <i>TAZ</i>       | Tafazzin                                                        |
| <i>TBC1D24</i>   | TBC1 Domain Family Member 24                                    |
| <i>TBL2</i>      | Transducin Beta Like 2                                          |
| <i>TBX1</i>      | T-Box 1                                                         |
| <i>TBX15</i>     | T-Box 15                                                        |
| <i>TBX22</i>     | T-Box 22                                                        |
| <i>TBX4</i>      | T-Box 4                                                         |
| <i>TCAP</i>      | Titin-Cap                                                       |
| <i>TCF12</i>     | Transcription Factor 12                                         |
| <i>TCIRG1</i>    | T Cell Immune Regulator 1, ATPase H+ Transporting V0 Subunit A3 |
| <i>TCOF1</i>     | Treacle Ribosome Biogenesis Factor 1                            |
| <i>TCTN3</i>     | Tectonic Family Member 3                                        |
| <i>TECTA</i>     | Tectorin Alpha                                                  |
| <i>TELO2</i>     | Telomere Maintenance 2                                          |
| <i>TERC</i>      | Telomerase RNA Component                                        |
| <i>TERT</i>      | Telomerase Reverse Transcriptase                                |
| <i>TFAP2A</i>    | Transcription Factor AP-2 Alpha                                 |
| <i>TFAP2B</i>    | Transcription Factor AP-2 Beta                                  |
| <i>TGFB1</i>     | Transforming Growth Factor Beta 1                               |
| <i>TGM1</i>      | Transglutaminase 1                                              |
| <i>THRB</i>      | Thyroid Hormone Receptor Beta                                   |
| <i>TIMM8A</i>    | Translocase Of Inner Mitochondrial Membrane 8A                  |
| <i>TIMMDC1</i>   | Translocase Of Inner Mitochondrial Membrane Domain Containing 1 |
| <i>TINF2</i>     | TERF1 Interacting Nuclear Factor 2                              |
| <i>TK2</i>       | Thymidine Kinase 2                                              |
| <i>TMC1</i>      | Transmembrane Channel Like 1                                    |
| <i>TMEM126A</i>  | Transmembrane Protein 126A                                      |
| <i>TMEM126B</i>  | Transmembrane Protein 126B                                      |
| <i>TMIE</i>      | Transmembrane Inner Ear                                         |
| <i>TMPO</i>      | Thymopoietin                                                    |
| <i>TNC</i>       | Tenascin C                                                      |
| <i>TNFRSF11A</i> | TNF Receptor Superfamily Member 11a                             |
| <i>TNFRSF11B</i> | TNF Receptor Superfamily Member 11b                             |
| <i>TNFSF11</i>   | TNF Superfamily Member 11                                       |
| <i>TNNC1</i>     | Troponin C1, Slow Skeletal And Cardiac Type                     |
| <i>TNNI3</i>     | Troponin I3, Cardiac Type                                       |
| <i>TNNT2</i>     | Troponin T2, Cardiac Type                                       |
| <i>TOPORS</i>    | TOP1 Binding Arginine/Serine Rich Protein                       |
| <i>TP63</i>      | Tumor Protein P63                                               |
| <i>TPM1</i>      | Tropomyosin 1                                                   |
| <i>TPRN</i>      | Taperin                                                         |
| <i>TRAPPC11</i>  | Trafficking Protein Particle Complex 11                         |
| <i>TRIM32</i>    | Tripartite Motif Containing 32                                  |
| <i>TRIOBP</i>    | TRIO And F-Actin Binding Protein                                |
| <i>TRIP13</i>    | Thyroid Hormone Receptor Interactor 13                          |
| <i>TRMU</i>      | TRNA 5-Methylaminomethyl-2-Thiouridylate Methyltransferase      |

|               |                                                                  |
|---------------|------------------------------------------------------------------|
| <i>TRNC</i>   | Mitochondrially Encoded TRNA-Cys (UGU/C)                         |
| <i>TRNE</i>   | Mitochondrially Encoded TRNA-Glu (GAA/G)                         |
| <i>TRNF</i>   | Mitochondrially Encoded TRNA-Phe (UUU/C)                         |
| <i>TRNH</i>   | Mitochondrially Encoded TRNA-His (CAU/C)                         |
| <i>TRNI</i>   | Mitochondrially Encoded TRNA-Ile (AUU/C)                         |
| <i>TRNK</i>   | Mitochondrially Encoded TRNA-Lys (AAA/G)                         |
| <i>TRNL1</i>  | Mitochondrially Encoded TRNA-Leu (UUA/G) 1                       |
| <i>TRNN</i>   | Mitochondrially Encoded TRNA-Asn (AAU/C)                         |
| <i>TRNP</i>   | Mitochondrially Encoded TRNA-Pro (CCN)                           |
| <i>TRNQ</i>   | Mitochondrially Encoded TRNA-Gln (CAA/G)                         |
| <i>TRNS1</i>  | Mitochondrially Encoded TRNA-Ser (UCN) 1                         |
| <i>TRNS2</i>  | Mitochondrially Encoded TRNA-Ser (AGU/C) 2                       |
| <i>TRNT1</i>  | TRNA Nucleotidyl Transferase 1                                   |
| <i>TRNV</i>   | Mitochondrially Encoded TRNA-Val (GUN)                           |
| <i>TRNW</i>   | Mitochondrially Encoded TRNA-Trp (UGA/G)                         |
| <i>TRPS1</i>  | Transcriptional Repressor GATA Binding 1                         |
| <i>TRPV4</i>  | Transient Receptor Potential Cation Channel Subfamily V Member 4 |
| <i>TSHZ1</i>  | Teashirt Zinc Finger Homeobox 1                                  |
| <i>TSPEAR</i> | Thrombospondin Type Laminin G Domain And EAR Repeats             |
| <i>TSR2</i>   | TSR2 Ribosome Maturation Factor                                  |
| <i>TTC19</i>  | Tetratricopeptide Repeat Domain 19                               |
| <i>TTC8</i>   | Tetratricopeptide Repeat Domain 8                                |
| <i>TTN</i>    | Titin                                                            |
| <i>TTR</i>    | Transthyretin                                                    |
| <i>TUB</i>    | TUB Bipartite Transcription Factor                               |
| <i>TULP1</i>  | TUB Like Protein 1                                               |
| <i>TWIST1</i> | Twist Family BHLH Transcription Factor 1                         |
| <i>TWIST2</i> | Twist Family BHLH Transcription Factor 2                         |
| <i>TWNK</i>   | Twinkle MtDNA Helicase                                           |
| <i>TXNL4A</i> | Thioredoxin Like 4A                                              |
| <i>TXNRD2</i> | Thioredoxin Reductase 2                                          |
| <i>TYMP</i>   | Thymidine Phosphorylase                                          |
| <i>TYR</i>    | Tyrosinase                                                       |
| <i>UBE2T</i>  | Ubiquitin Conjugating Enzyme E2 T                                |
| <i>UBR1</i>   | Ubiquitin Protein Ligase E3 Component N-Recognin 1               |
| <i>UFD1</i>   | Ubiquitin Recognition Factor In ER Associated Degradation 1      |
| <i>UGT1A1</i> | UDP Glucuronosyltransferase Family 1 Member A1                   |
| <i>USB1</i>   | U6 SnRNA Biogenesis Phosphodiesterase 1                          |
| <i>USH1C</i>  | USH1 Protein Network Component Harmonin                          |
| <i>USH1G</i>  | USH1 Protein Network Component Sans                              |
| <i>USH2A</i>  | Usherin                                                          |
| <i>USP9X</i>  | Ubiquitin Specific Peptidase 9 X-Linked                          |
| <i>VCL</i>    | Vinculin                                                         |
| <i>VHL</i>    | Von Hippel-Lindau Tumor Suppressor                               |
| <i>VPS11</i>  | VPS11, CORVET/HOPS Core Subunit                                  |
| <i>VPS13B</i> | Vacuolar Protein Sorting 13 Homolog B                            |
| <i>WAC</i>    | WW Domain Containing Adaptor With Coiled-Coil                    |
| <i>WDPCP</i>  | WD Repeat Containing Planar Cell Polarity Effector               |
| <i>WDR11</i>  | WD Repeat Domain 11                                              |
| <i>WFS1</i>   | Wolframin ER Transmembrane Glycoprotein                          |
| <i>WHRN</i>   | Whirlin                                                          |
| <i>WNT10B</i> | Wnt Family Member 10B                                            |
| <i>WNT5A</i>  | Wnt Family Member 5A                                             |
| <i>WRAP53</i> | WD Repeat Containing Antisense To TP53                           |
| <i>XPA</i>    | XPA, DNA Damage Recognition And Repair Factor                    |
| <i>XPC</i>    | XPC Complex Subunit, DNA Damage Recognition And Repair Factor    |

|                 |                                          |
|-----------------|------------------------------------------|
| <i>XPNPEP3</i>  | X-Prolyl Aminopeptidase 3                |
| <i>XRCC2</i>    | X-Ray Repair Cross Complementing 2       |
| <i>XRCC4</i>    | X-Ray Repair Cross Complementing 4       |
| <i>XYLT2</i>    | Xylosyltransferase 2                     |
| <i>YAP1</i>     | Yes Associated Protein 1                 |
| <i>ZBTB20</i>   | Zinc Finger And BTB Domain Containing 20 |
| <i>ZFP57</i>    | ZFP57 Zinc Finger Protein                |
| <i>ZIC1</i>     | Zic Family Member 1                      |
| <i>ZMPSTE24</i> | Zinc Metallopeptidase STE24              |
| <i>ZNF408</i>   | Zinc Finger Protein 408                  |
| <i>ZNF469</i>   | Zinc Finger Protein 469                  |
| <i>ZNF513</i>   | Zinc Finger Protein 513                  |

***Severe hearing impairment (HP:0012714), 5 genes***

|               |                                                    |
|---------------|----------------------------------------------------|
| <i>BRAF</i>   | B-Raf Proto-Oncogene, Serine/Threonine Kinase      |
| <i>GPSM2</i>  | G Protein Signaling Modulator 2                    |
| <i>PTPN11</i> | Protein Tyrosine Phosphatase, Non-Receptor Type 11 |
| <i>RAF1</i>   | Raf-1 Proto-Oncogene, Serine/Threonine Kinase      |
| <i>TRIOBP</i> | TRIO And F-Actin Binding Protein                   |
